# Supplementary material for: Synthesis and Biological Evaluation of Curcumin Derivatives with Water-Soluble Groups as Potential Antitumor Agents: An in Vitro Investigation Using Tumor Cell Lines
Source: PubMed Central journal article supplement (PMC6332428; doi:10.3390/molecules201219772), 2015-12-02
Supplement: molecules-20-19772-s001.pdf [file molecules-20-19772-s001.pdf]

# Supplementary Materials: Synthesis and Biological Evaluation of Curcumin Derivatives with Water-Soluble Groups as Potential Antitumor Agents: An *in Vitro* Investigation Using Tumor Cell Lines

Luyang Ding, Shuli Ma, Hongxiang Lou, Longru Sun and Mei Ji

## 1. Cell Apoptosis Effects of Compounds 8 and 9 on HeLa or 12 on MCF-7

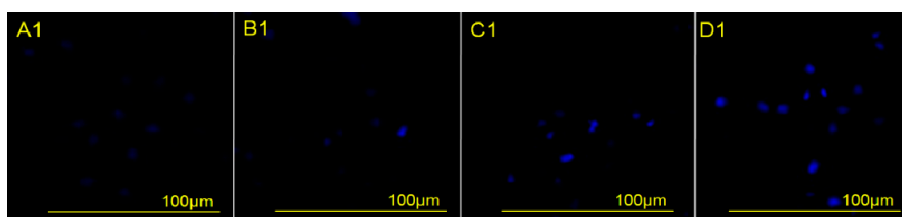

**Figure S1.** Effects of compound 8 on HeLa cell apoptosis was observed by DAPI staining under an inversion fluorescent microscope. HeLa cells were incubated with 0  $\mu\text{M}$  (A1); 2.5  $\mu\text{M}$  (B1); 5  $\mu\text{M}$  (C1); or 10  $\mu\text{M}$  (D1) of compound 8 for 48 h.

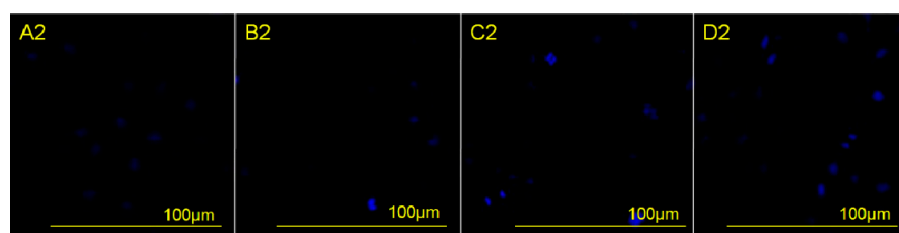

**Figure S2.** Effects of compound 9 on HeLa cell apoptosis was observed by DAPI staining under an inversion fluorescent microscope. HeLa cells were incubated with 0  $\mu\text{M}$  (A2); 2.5  $\mu\text{M}$  (B2); 5  $\mu\text{M}$  (C2); or 10  $\mu\text{M}$  (D2) of compound 9 for 48 h.

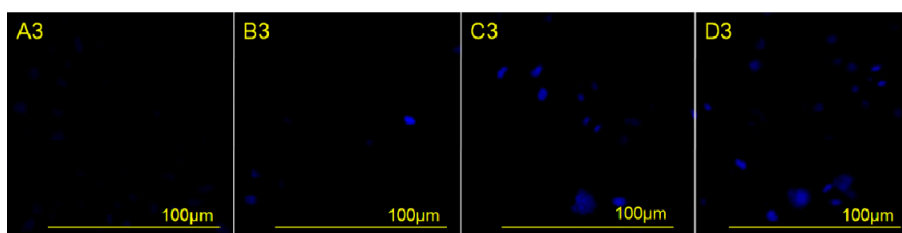

**Figure S3.** Effects of compound 12 on HeLa cell apoptosis was observed by DAPI staining under an inversion fluorescent microscope. HeLa cells were incubated with 0  $\mu\text{M}$  (A3); 2.5  $\mu\text{M}$  (B3); 5  $\mu\text{M}$  (C3); or 10  $\mu\text{M}$  (D3) of compound 12 for 48 h.

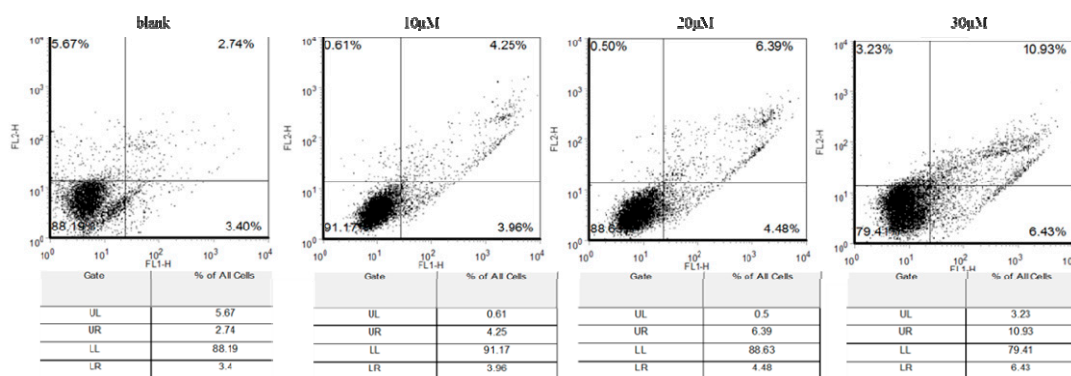

**A**

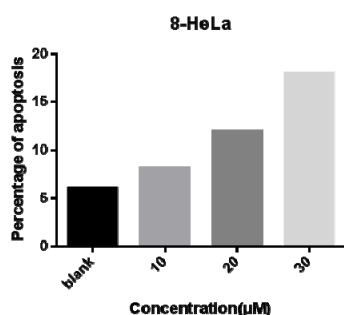

**B**

**Figure S4.** (A) HeLa cells were treated with compound 8 (0, 10, 20, or 30 μM) for 24 h and then analyzed by Annexin V-FITC/PI staining and flow cytometry. The apoptotic cell scatter plot is divided into four quadrants: upper left (UL), upper right (UR), lower left (LL), and lower right (LR) quadrants; (B) Apoptosis rate of HeLa cells treated with various concentrations of compound 8.

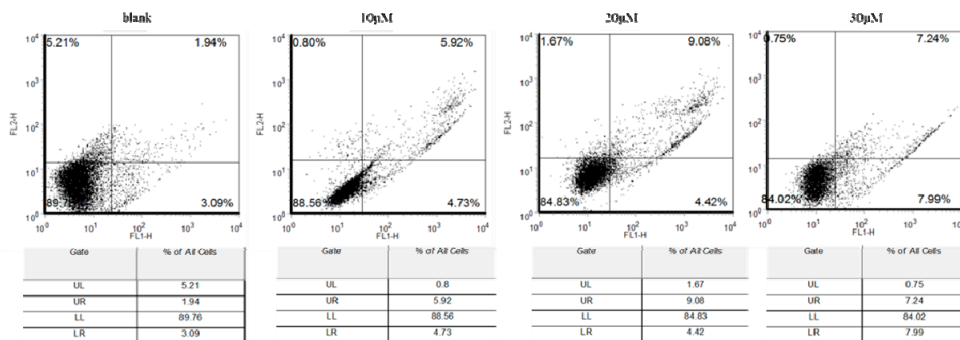

**A**

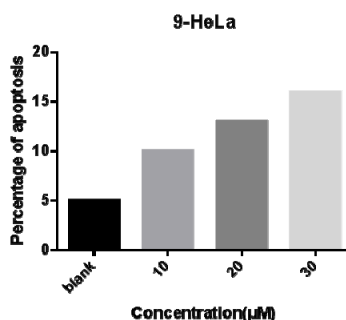

**B**

**Figure S5.** (A) HeLa cells were treated with compound 9 (0, 10, 20, or 30 μM) for 24 h and then analyzed by Annexin V-FITC/PI staining and flow cytometry. The apoptotic cell scatter plot is divided into four quadrants: upper left (UL), upper right (UR), lower left (LL), and lower right (LR) quadrants; (B) Apoptosis rate of HeLa cells treated with various concentrations of compound 9.

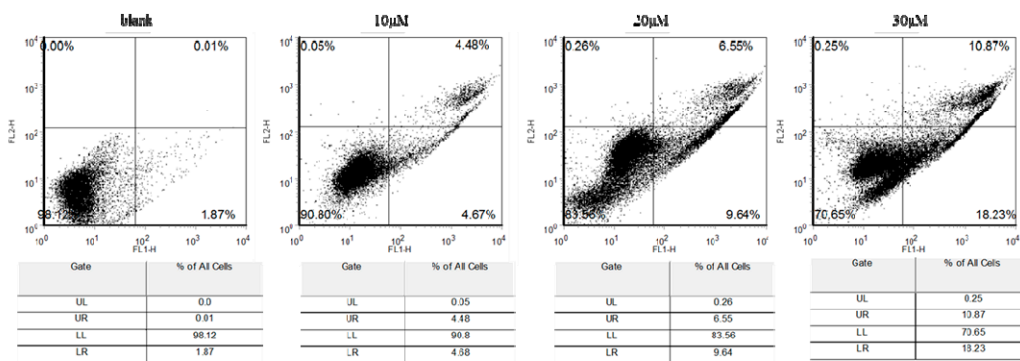

A

12-MCF-7

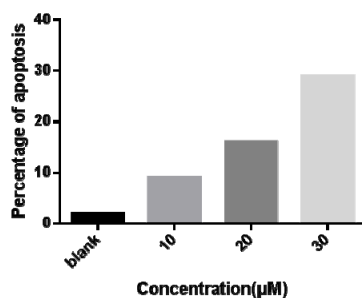

B

**Figure S6.** (A) MCF-7 cells were treated with compound **12** (0, 10, 20, or 30  $\mu\text{M}$ ) for 24 h and then analyzed by Annexin V-FITC/PI staining and flow cytometry. The apoptotic cell scatter plot is divided into four quadrants: upper left (UL), upper right (UR), lower left (LL), and lower right (LR) quadrants. (B) Apoptosis rate of MCF-7 cells treated with various concentrations of compound **12**.

## 2. $^1\text{H-NMR}$ , $^{13}\text{C-NMR}$ , $^{31}\text{P-NMR}$ , MS-ESI, and HRMS-ESI of the Synthetic Compounds

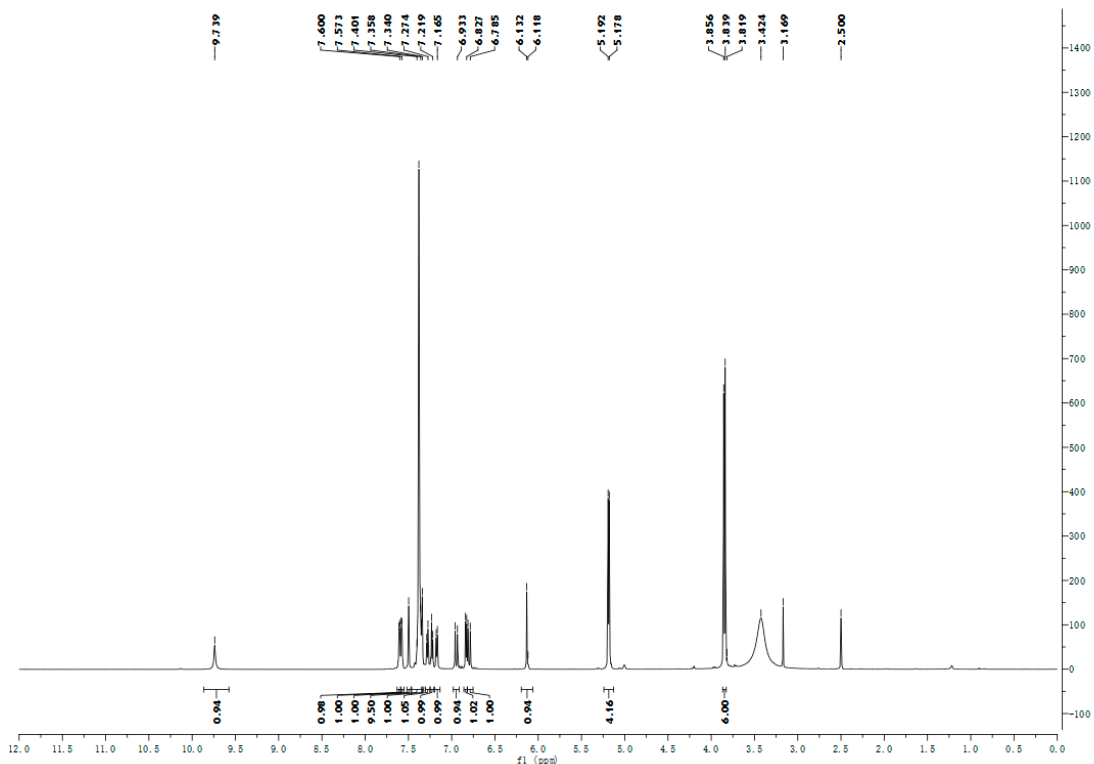

**Figure S7.**  $^1\text{H-NMR}$  for compound **1**.

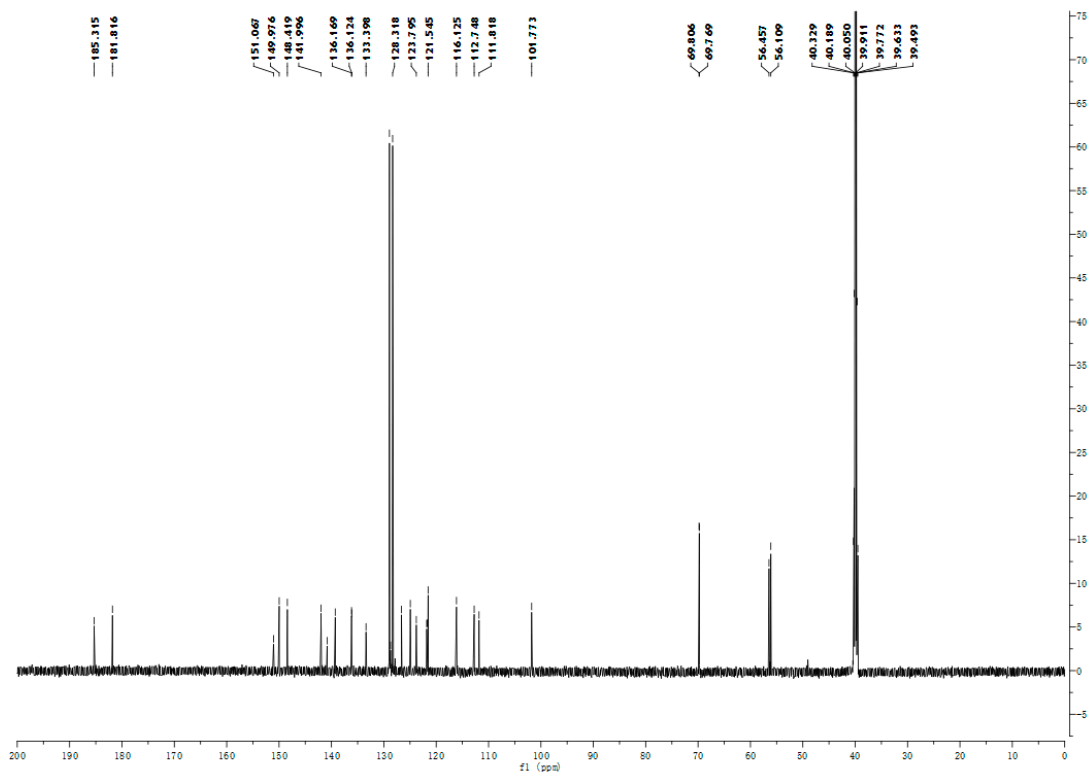

Figure S8. <sup>13</sup>C-NMR for compound 1.

R.Time:0.983(Scan#:119)  
 MassPeaks:700 BasePeak:627(50711)  
 Spectrum Mode:Single 0.983(119)  
 BG Mode:Averaged 0.033-0.692(5-84) Polarity:Negative Segment 1 - Event 1

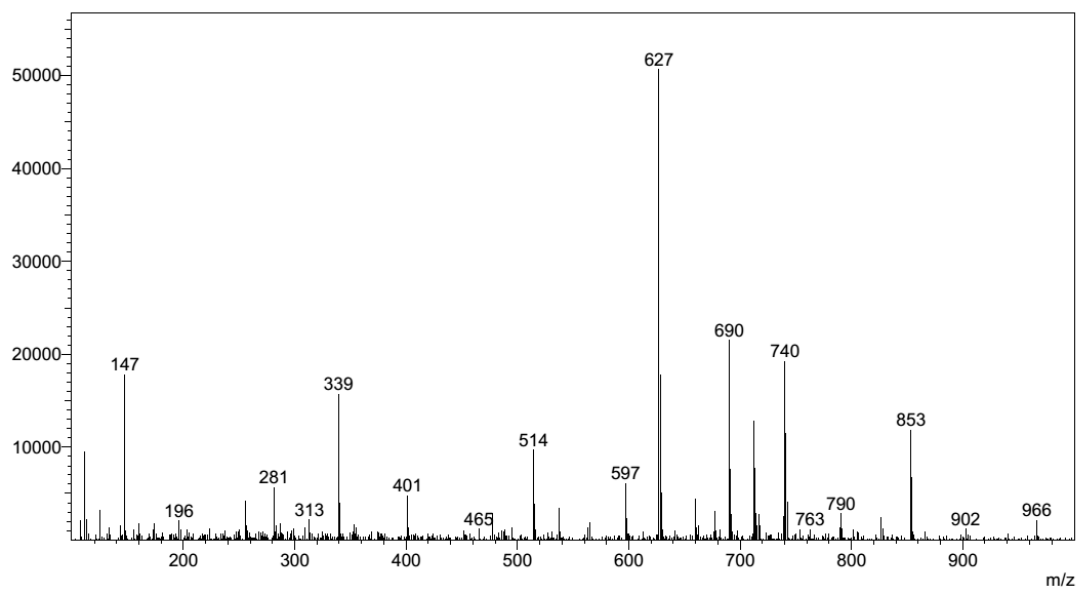

Figure S9. MS-ESI for compound 1.

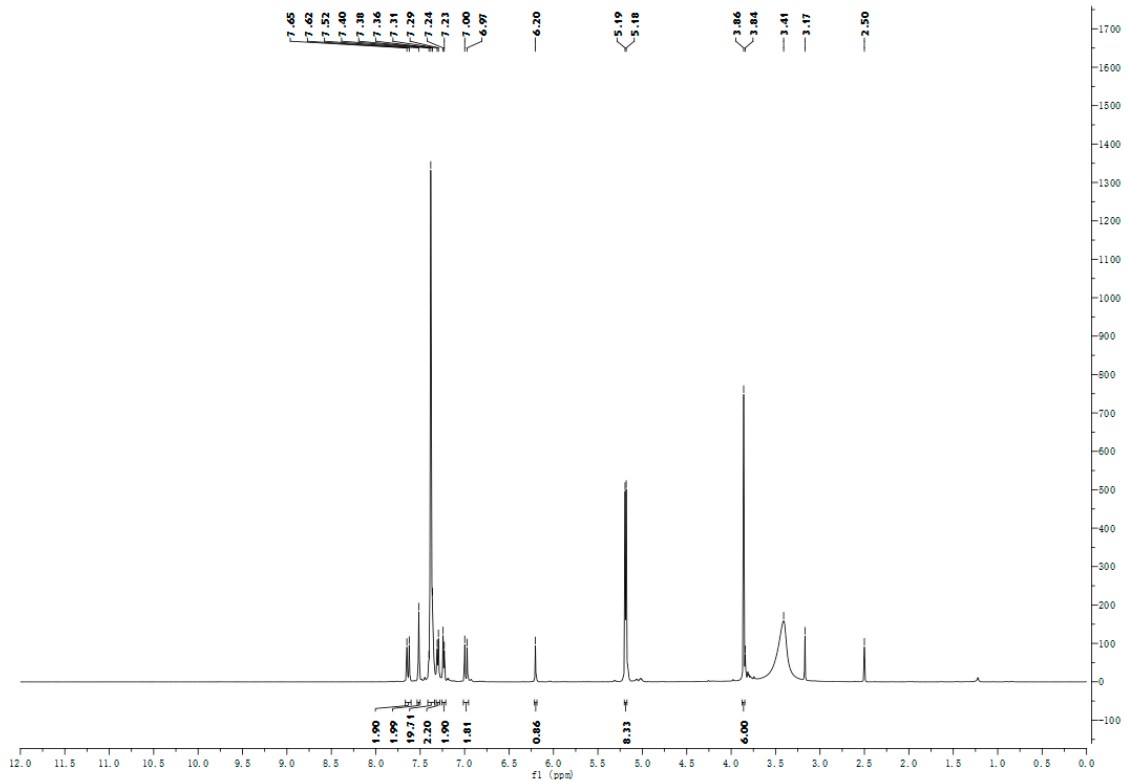

Figure S10. <sup>1</sup>H-NMR for compound 2.

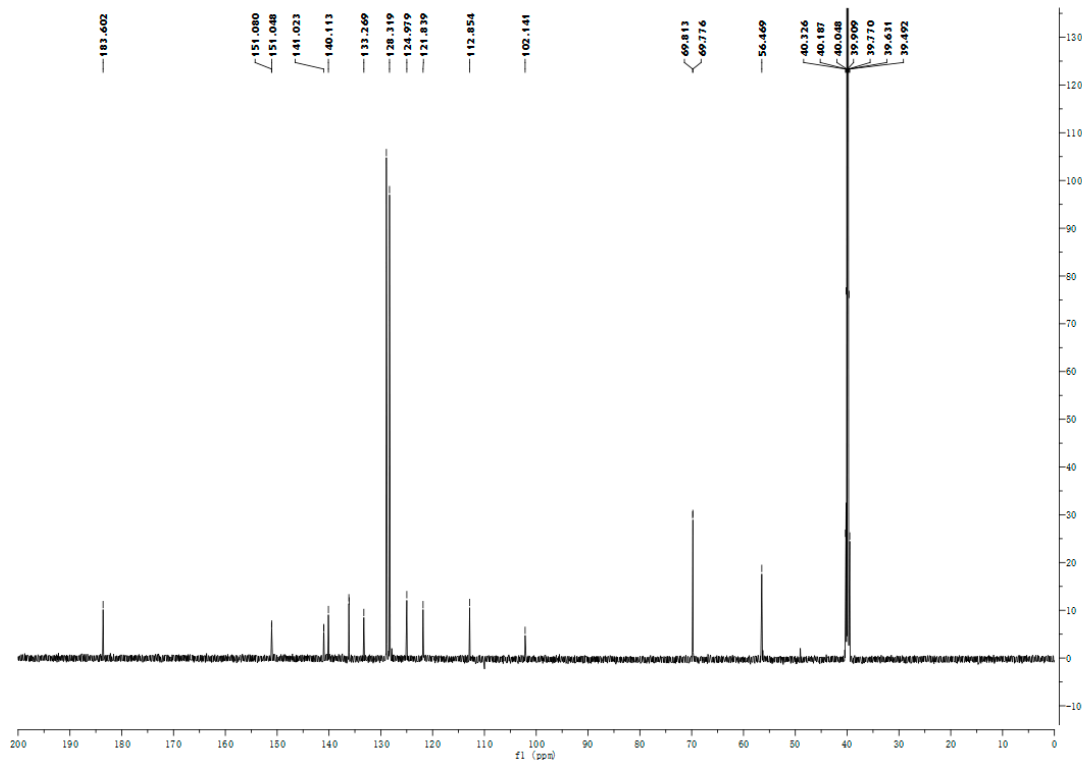

Figure S11. <sup>13</sup>C-NMR for compound 2.

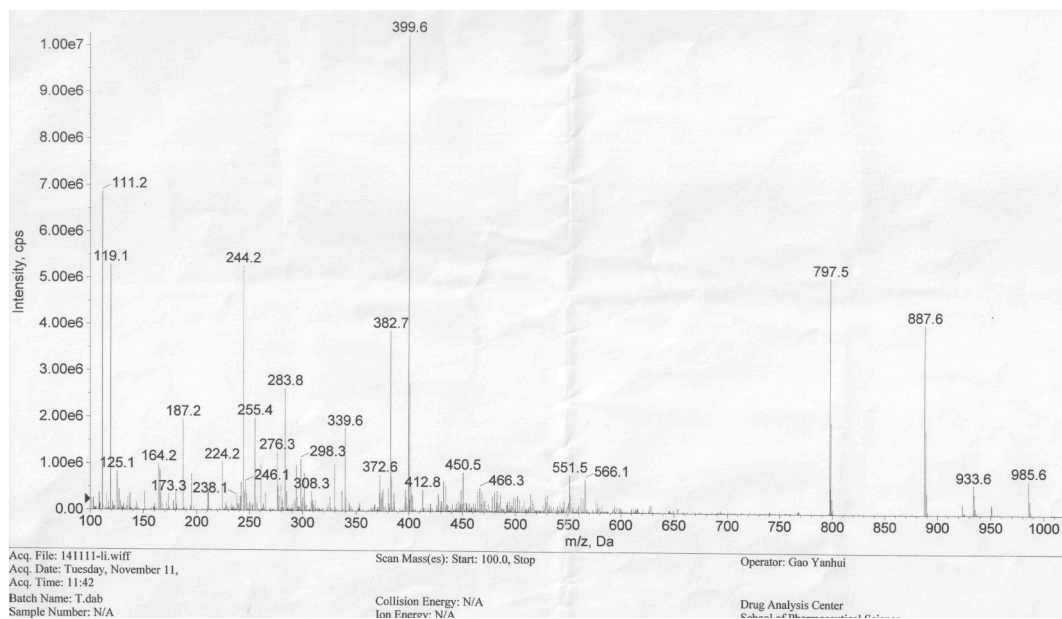

Figure S12. MS-ESI for compound 2.

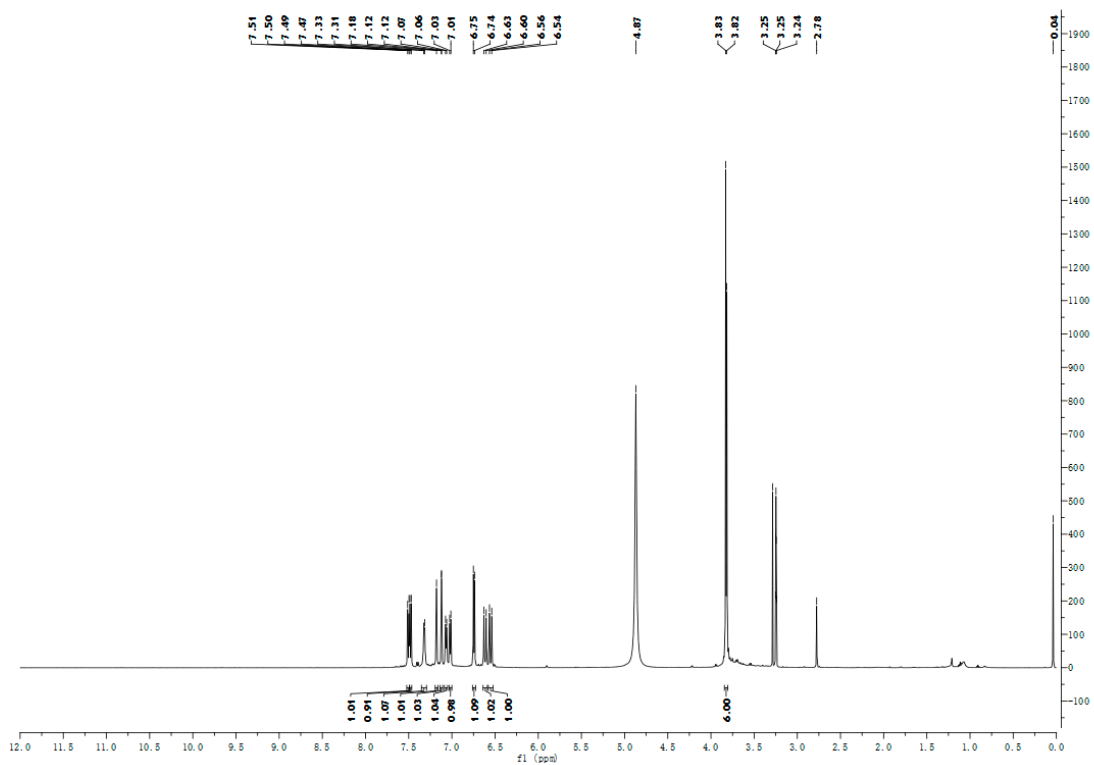

Figure S13. <sup>1</sup>H-NMR for compound 3.

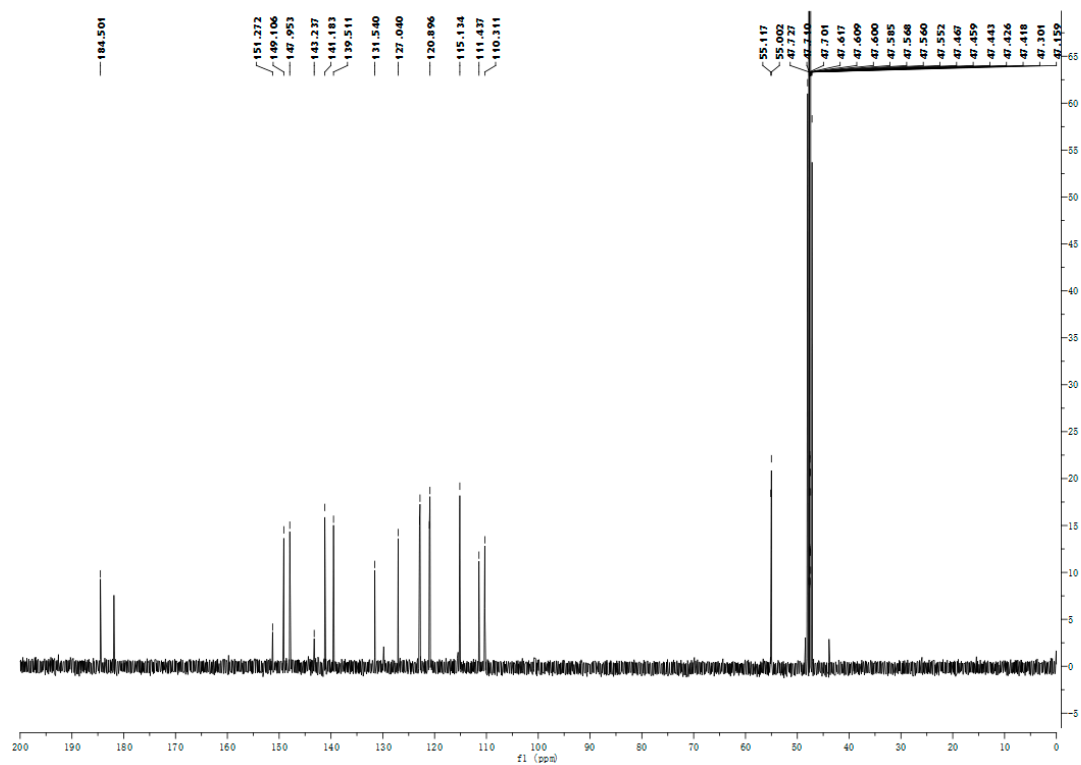

Figure S14.  $^{13}\text{C}$ -NMR for compound 3.

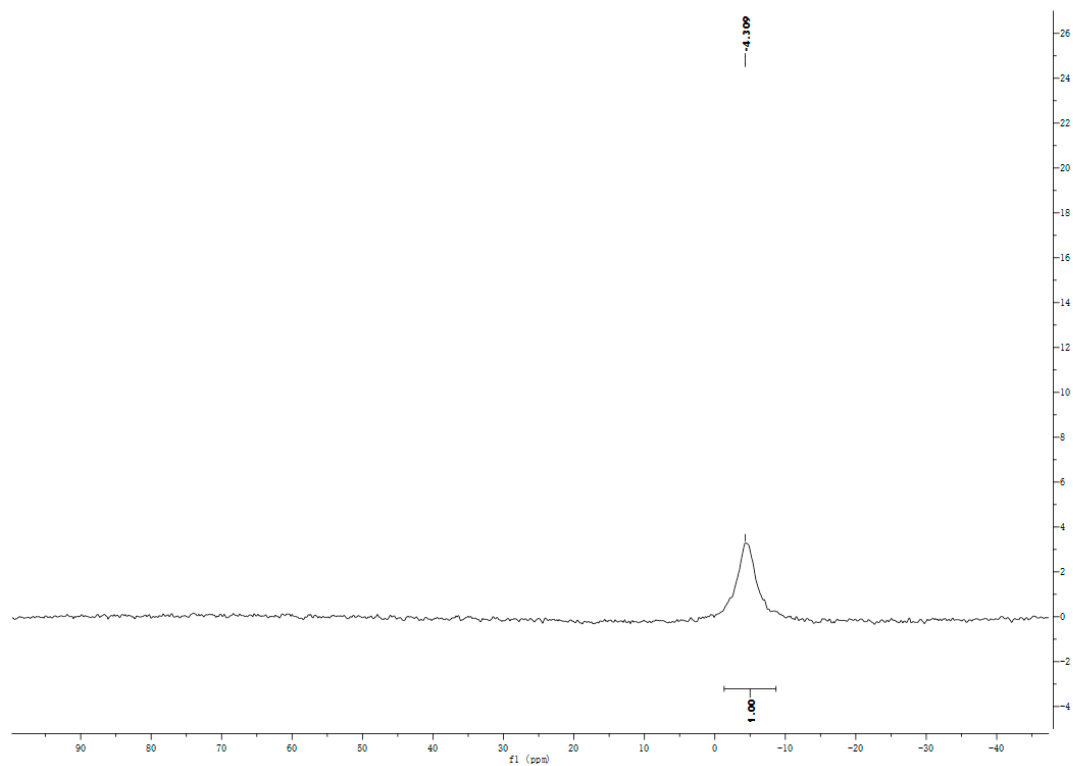

Figure S15.  $^{31}\text{P}$ -NMR for compound 3.

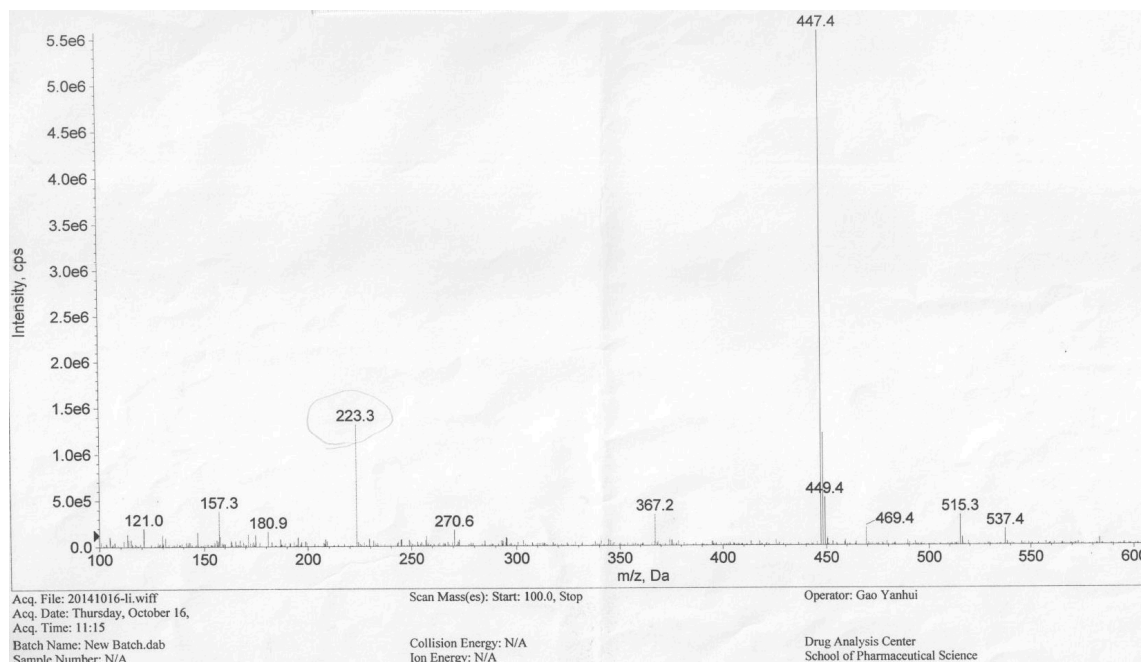

**Figure S16.** MS-ESI for compound 3.

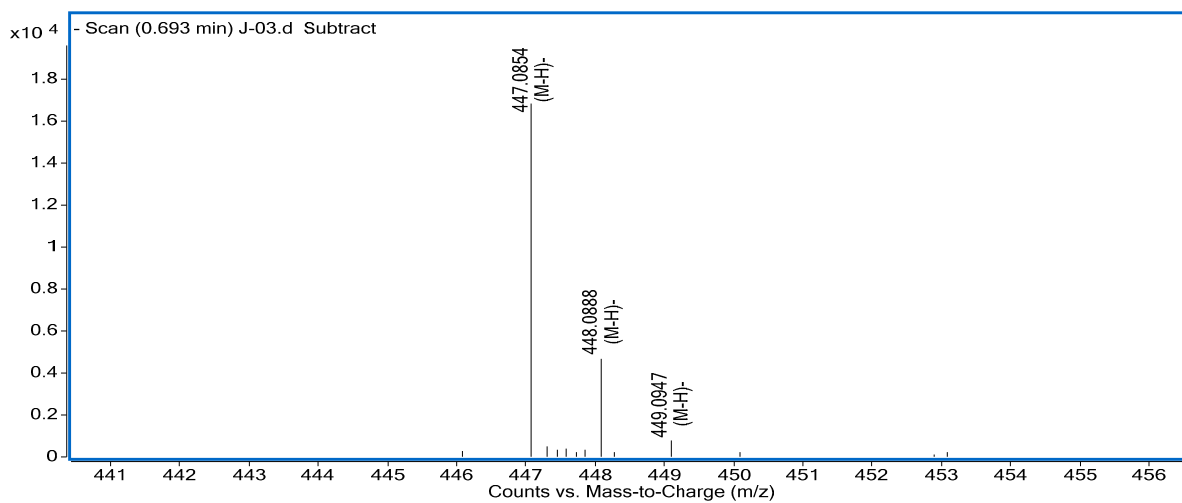

**Figure S17.** HRMS-ESI for compound 3.



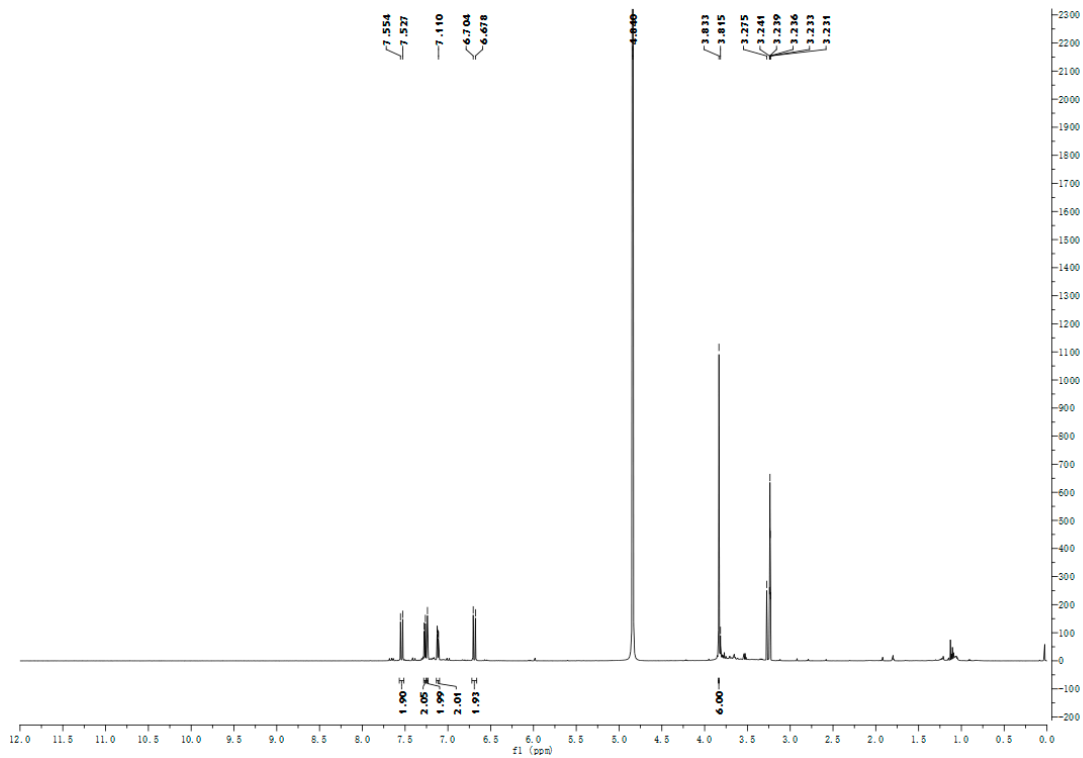

Figure S18. <sup>1</sup>H-NMR for compound 4.

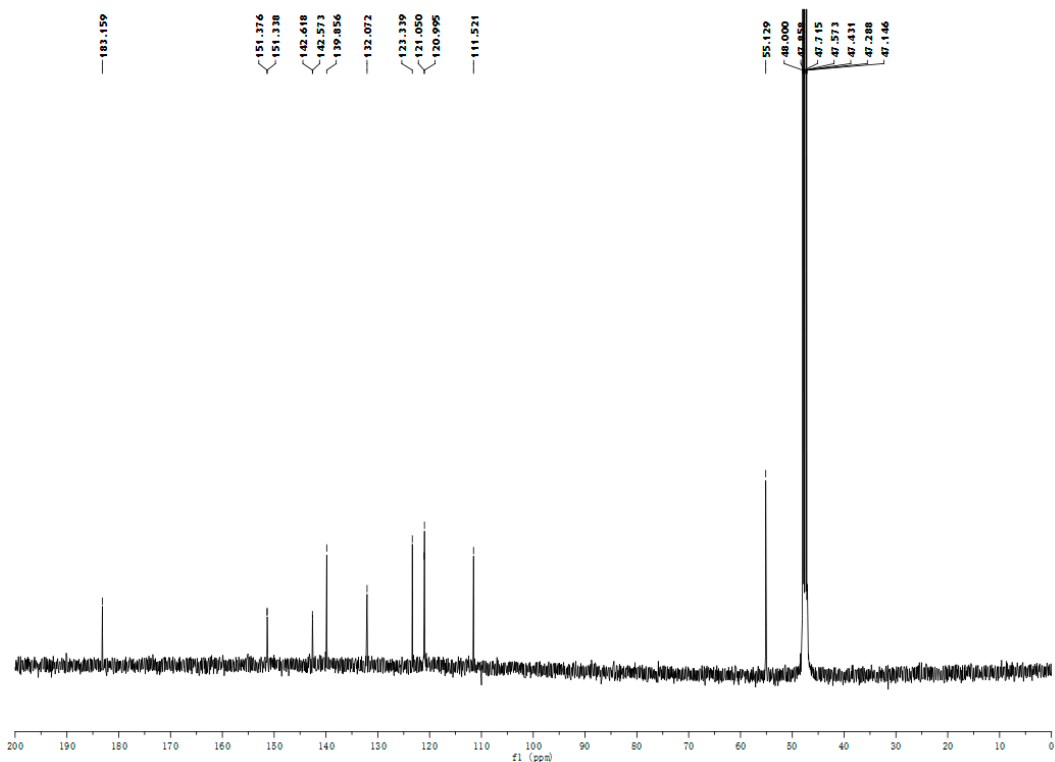

Figure S19. <sup>13</sup>C-NMR for compound 4.

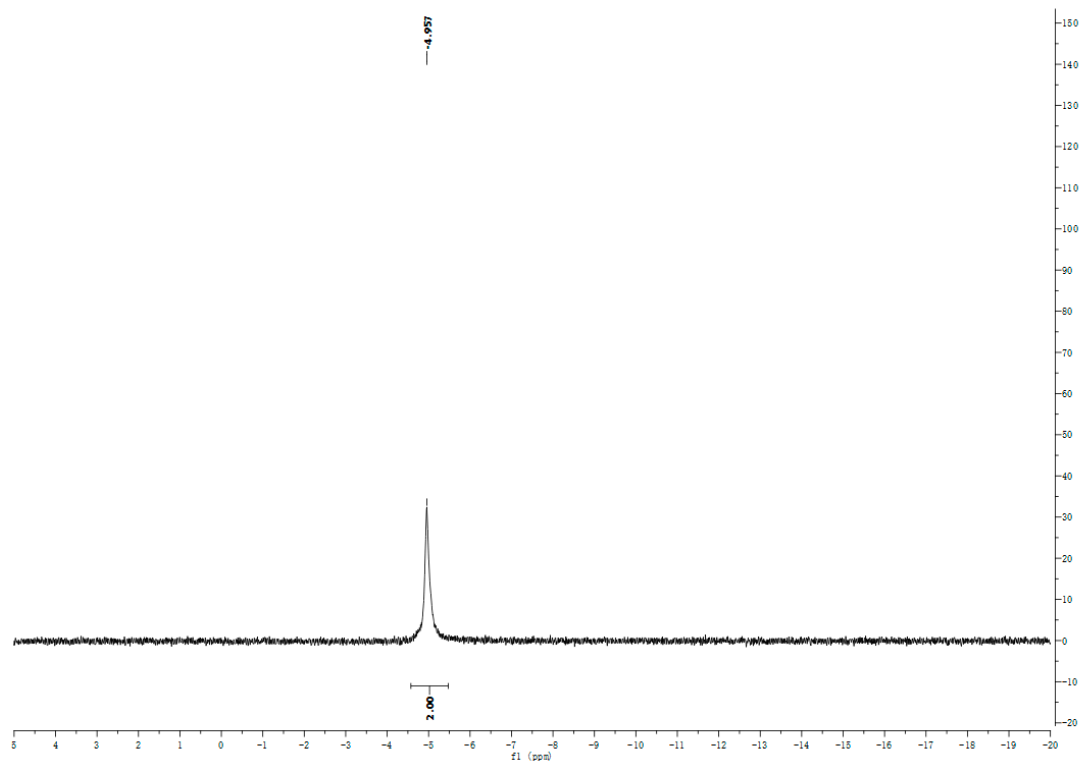

Figure S20. <sup>31</sup>P-NMR for compound 4.

R.Time:0.183(Scan#:23)  
MassPeaks:996 BasePeak:263(270259)  
Spectrum Mode:Single 0.183(23)  
BG Mode:None Polarity:Negative Segment 1 - Event 1

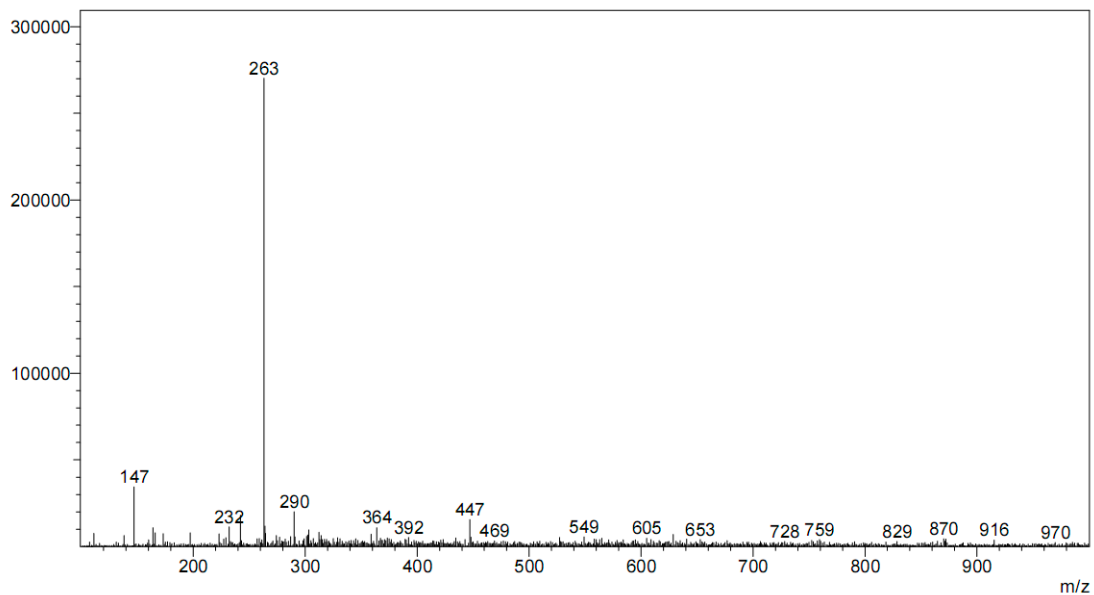

Figure S21. MS-ESI for compound 4.

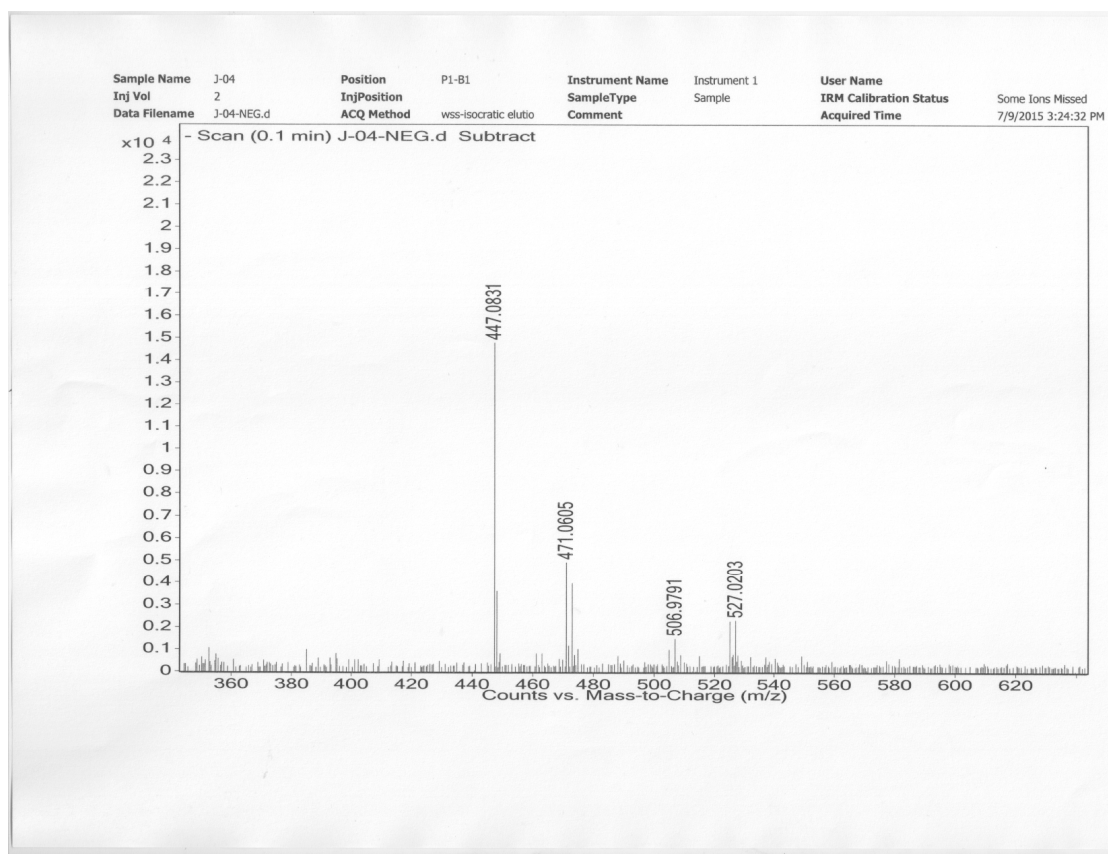

Figure S22. HRMS-ESI for compound 4.

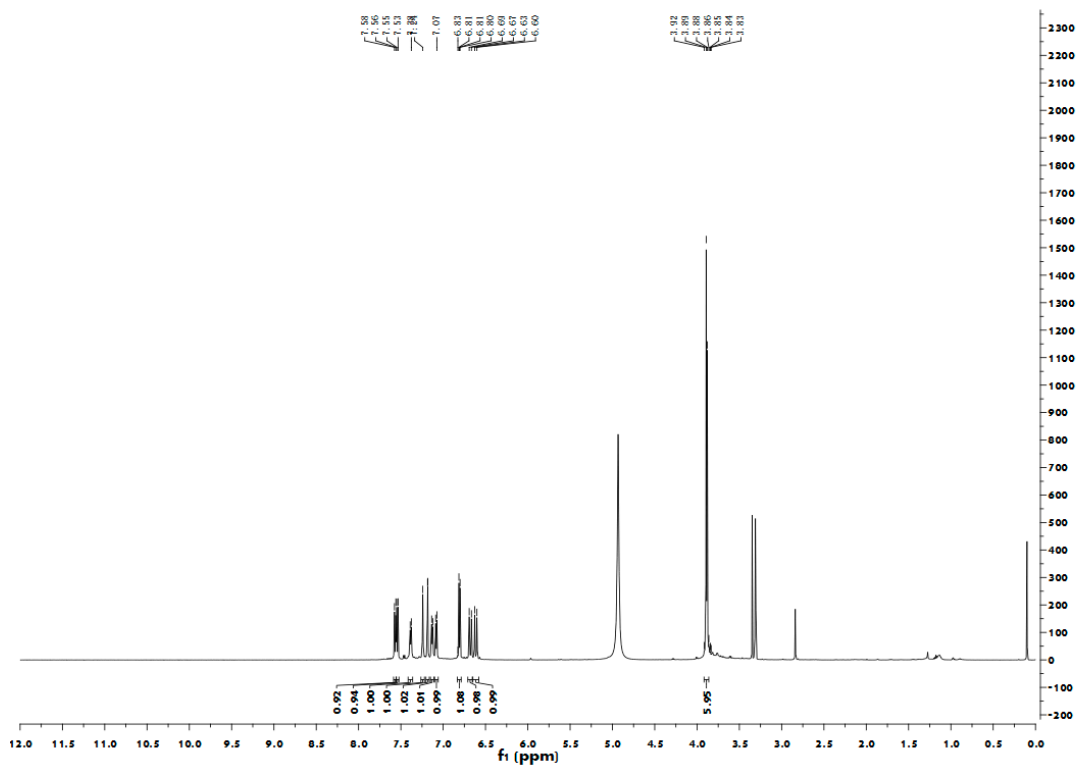

Figure S23.  $^1\text{H}$ -NMR for compound 5.

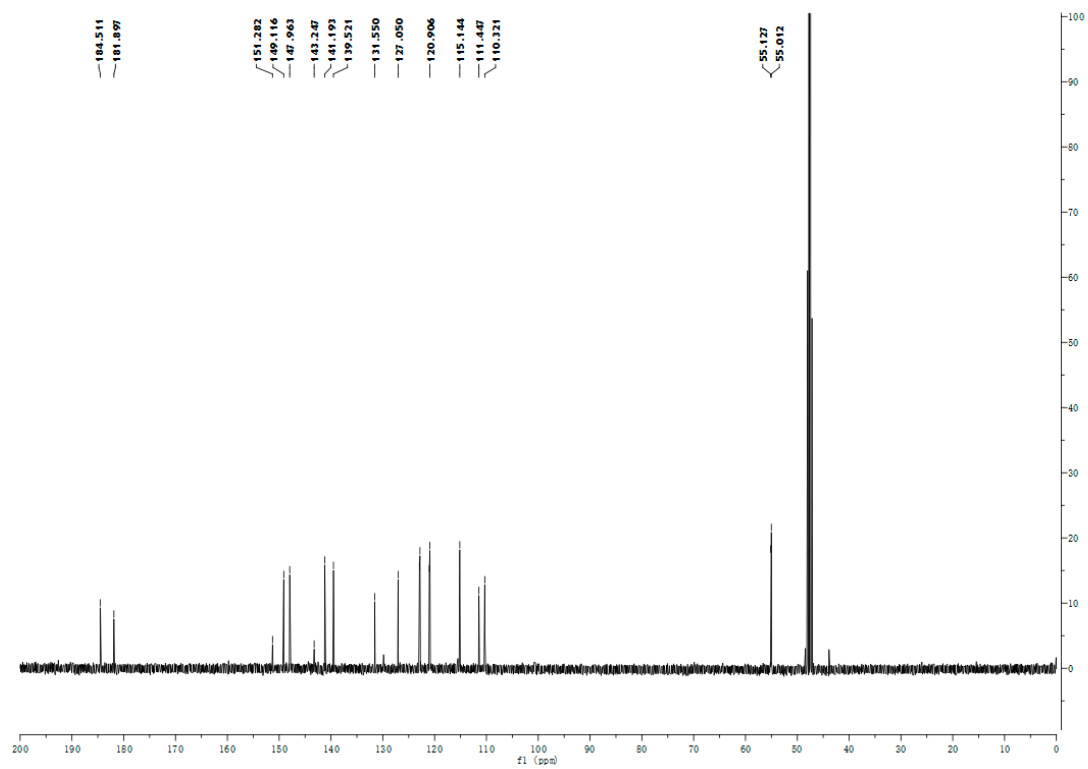

Figure S24.  $^{13}\text{C}$ -NMR for compound 5.

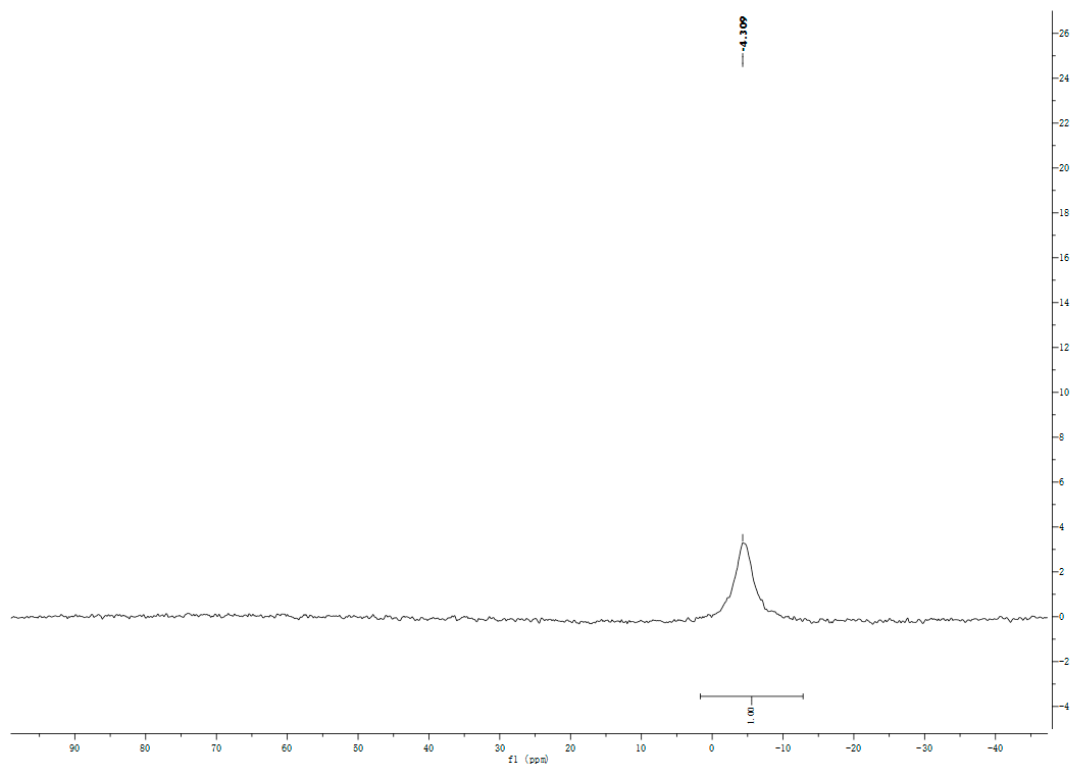

Figure S25.  $^{31}\text{P}$ -NMR for compound 5.

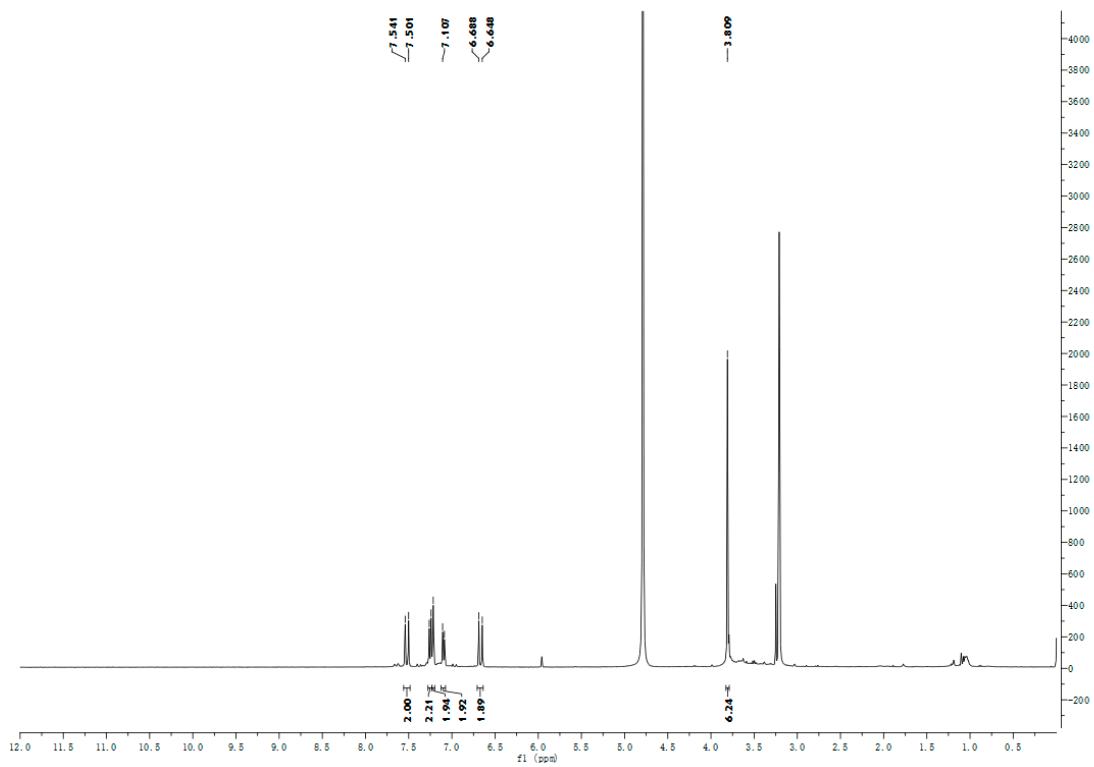

Figure S26.  $^1\text{H-NMR}$  for compound 6.

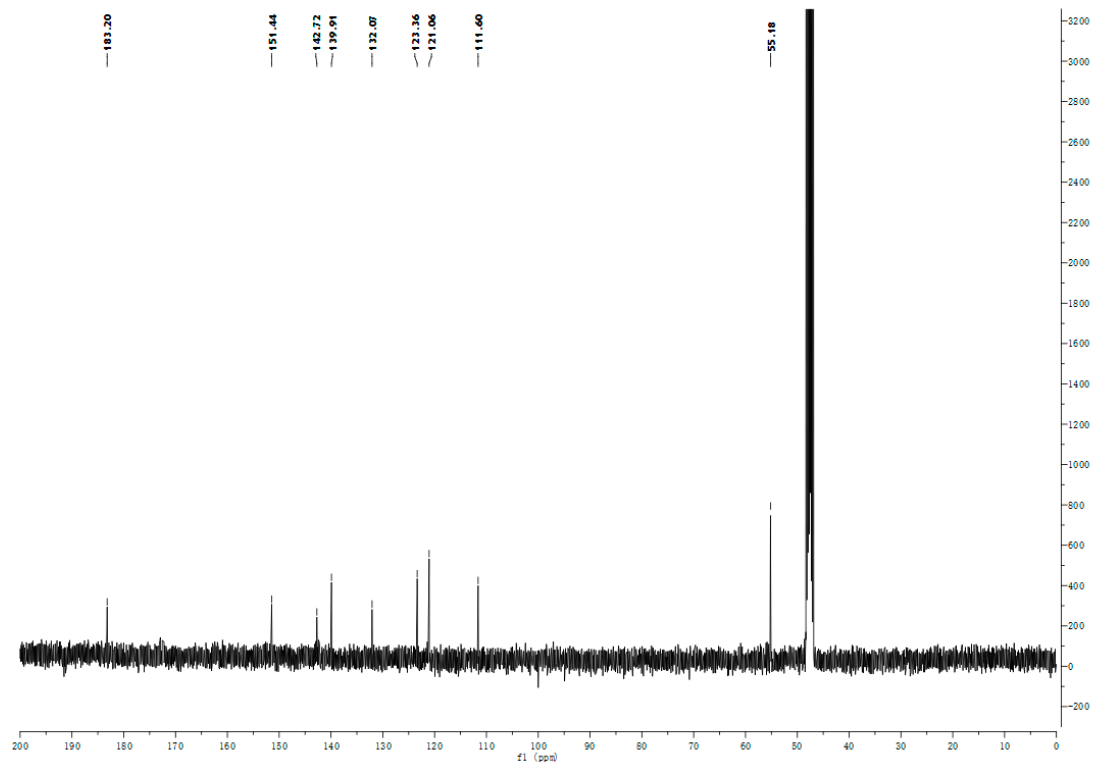

Figure S27.  $^{13}\text{C-NMR}$  for compound 6.

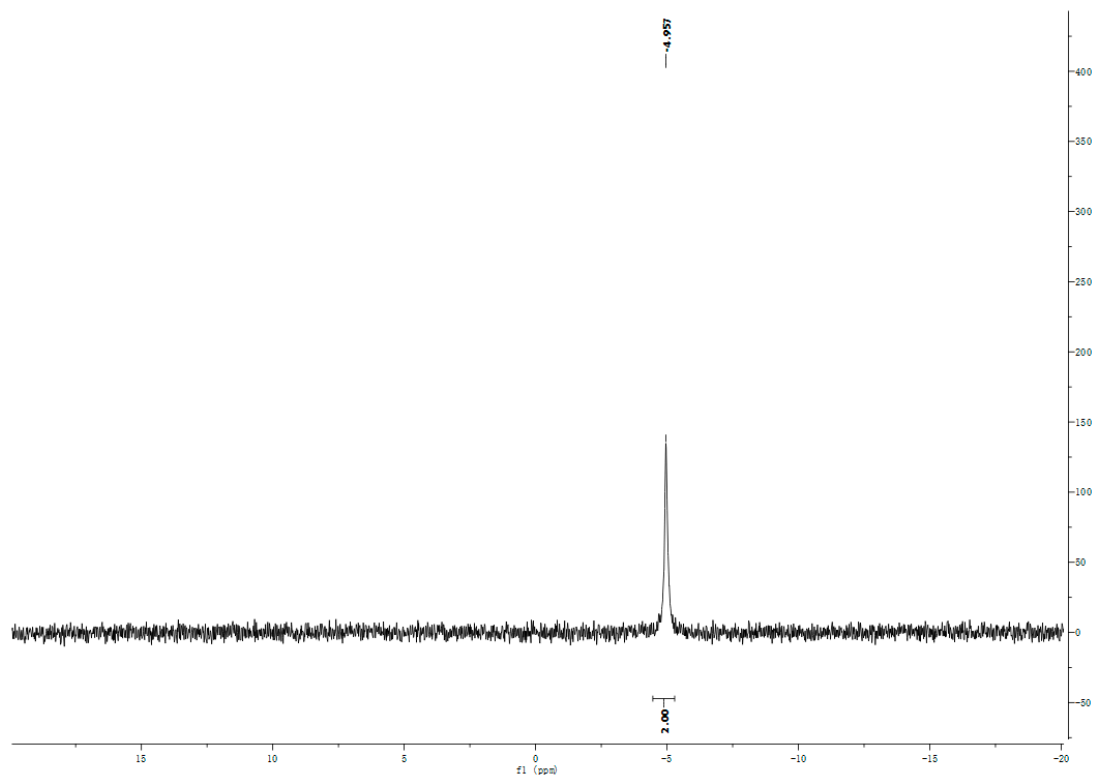

Figure S28. <sup>31</sup>P-NMR for compound 6.

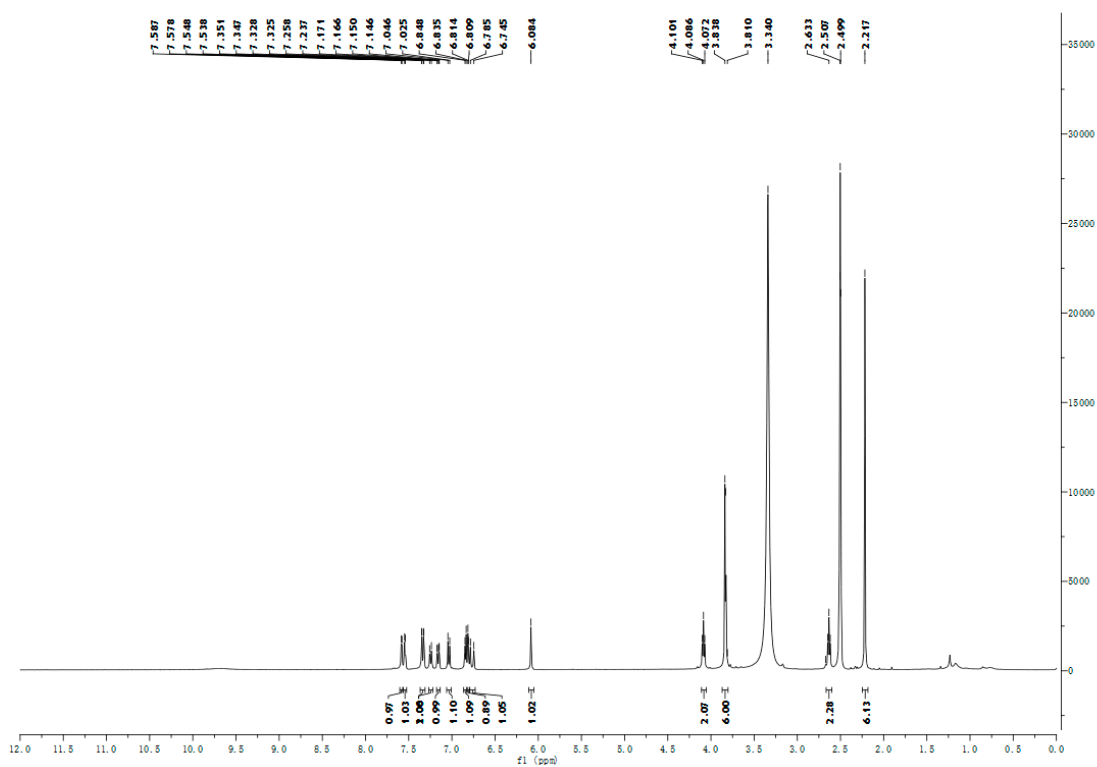

Figure S29. <sup>1</sup>H-NMR for compound 7.

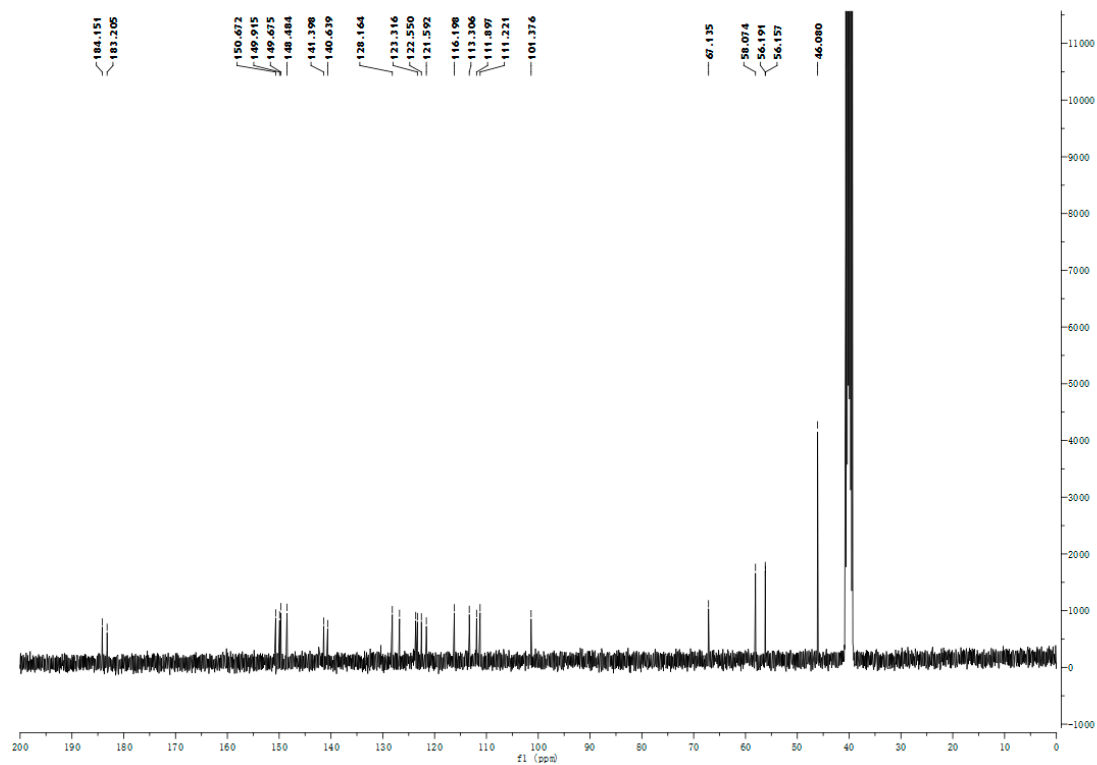

Figure S30. <sup>13</sup>C-NMR for compound 7.

R.Time:1.292(Scan#:156)  
MassPeaks:439 BasePeak:440(116788)  
Spectrum Mode:Single 1.292(156)  
BG Mode:Averaged 0.092-1.142(12-138) Polarity:Positive Segment 1 - Event 1

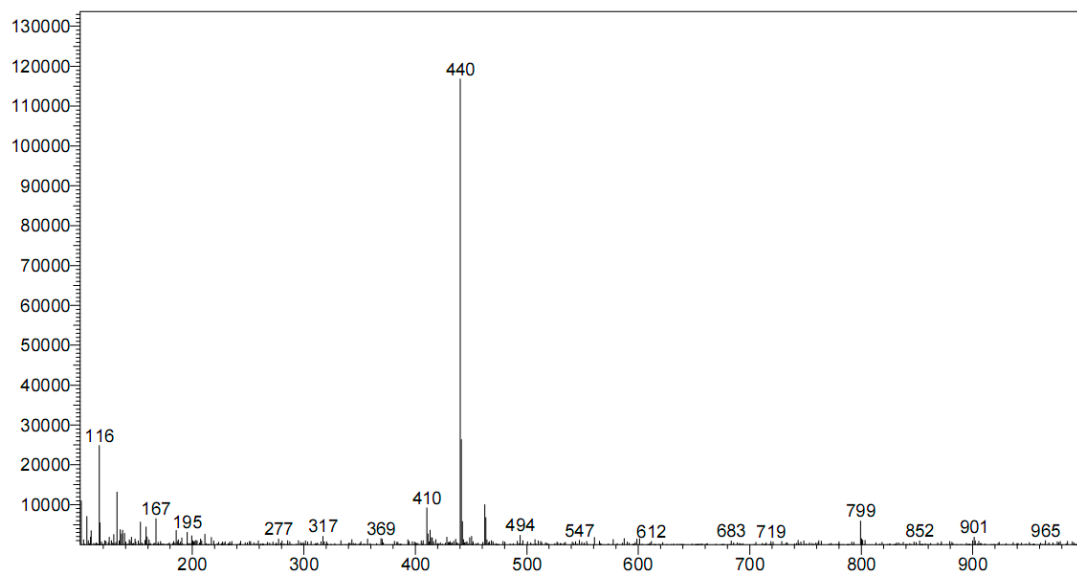

Figure S31. MS-ESI for compound 7.

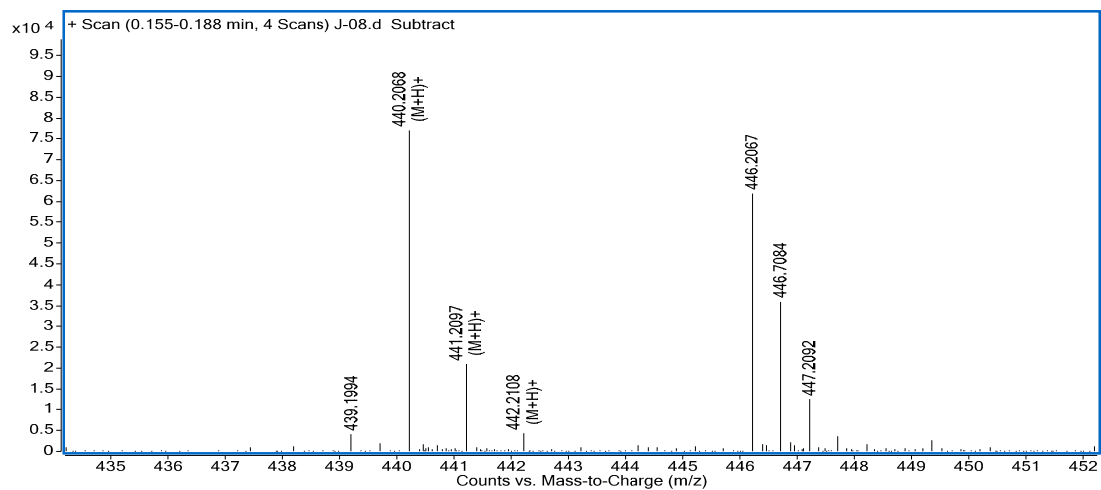

Figure S32. HRMS-ESI for compound 7.

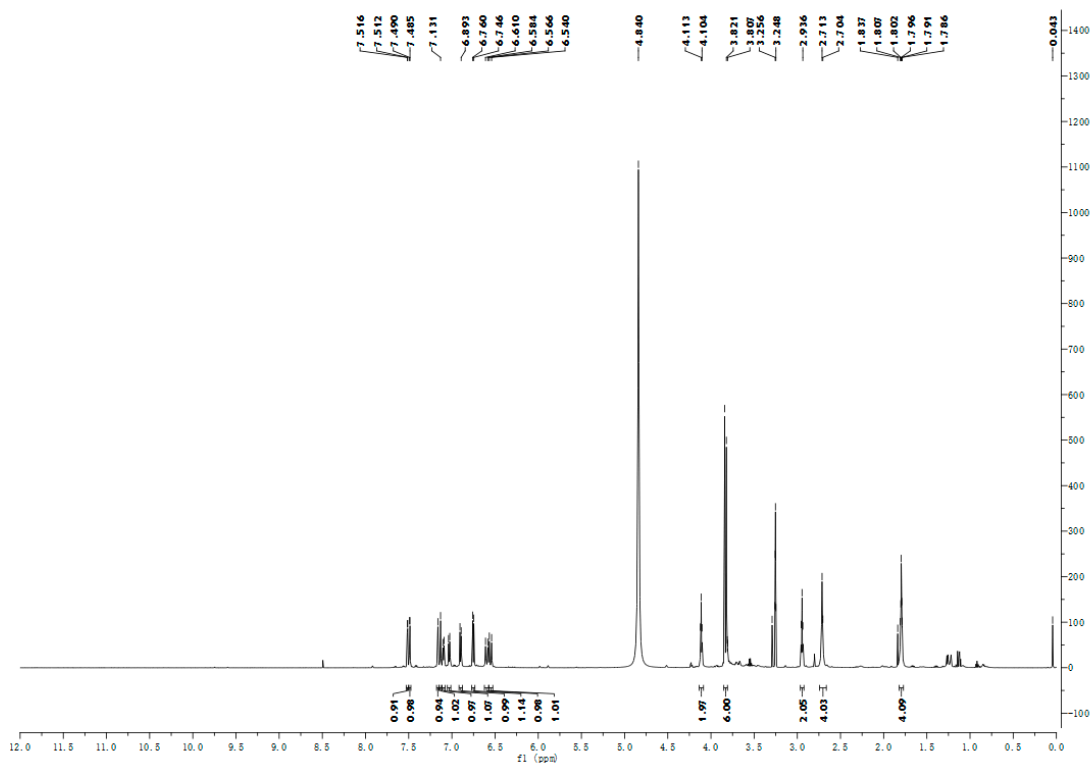

Figure S33. <sup>1</sup>H-NMR for compound 8.



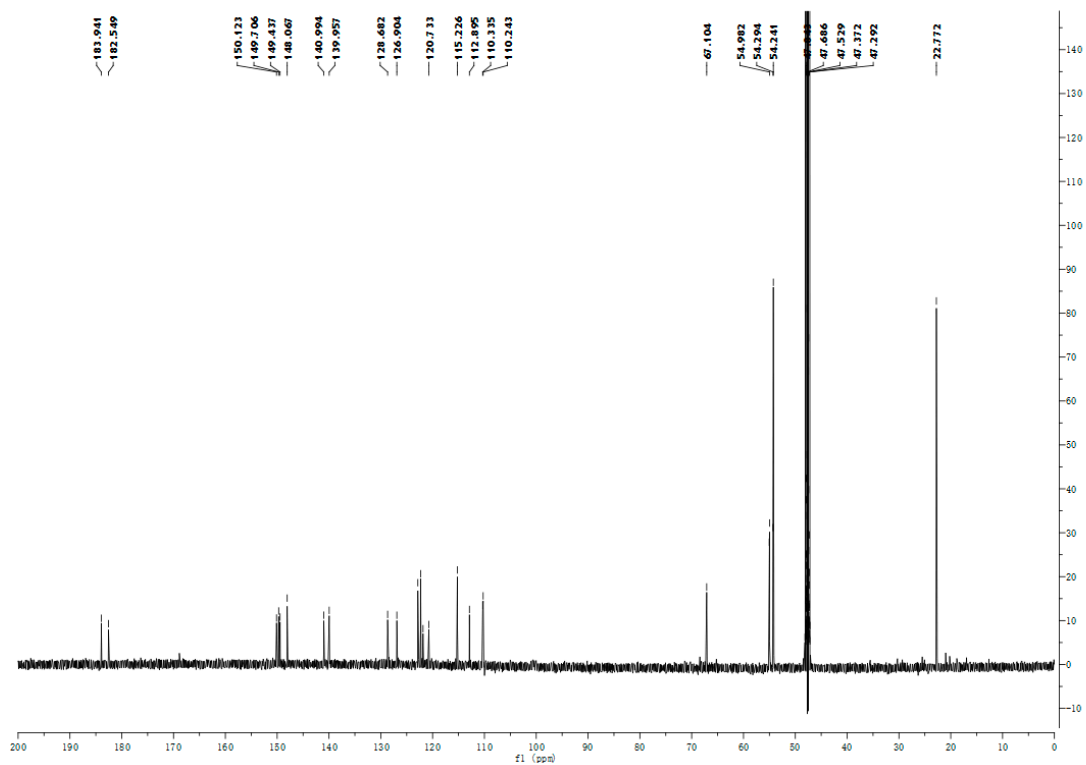

Figure S34.  $^{13}\text{C}$ -NMR for compound 8.

R. Time: 0.508 (Scan#: 62)  
 MassPeaks: 213 BasePeak: 466 (123500)  
 Spectrum Mode: Single 0.508 (62)  
 BG Mode: Averaged 0.025-0.342 (4-42) Polarity: Positive Segment 1 - Event 1

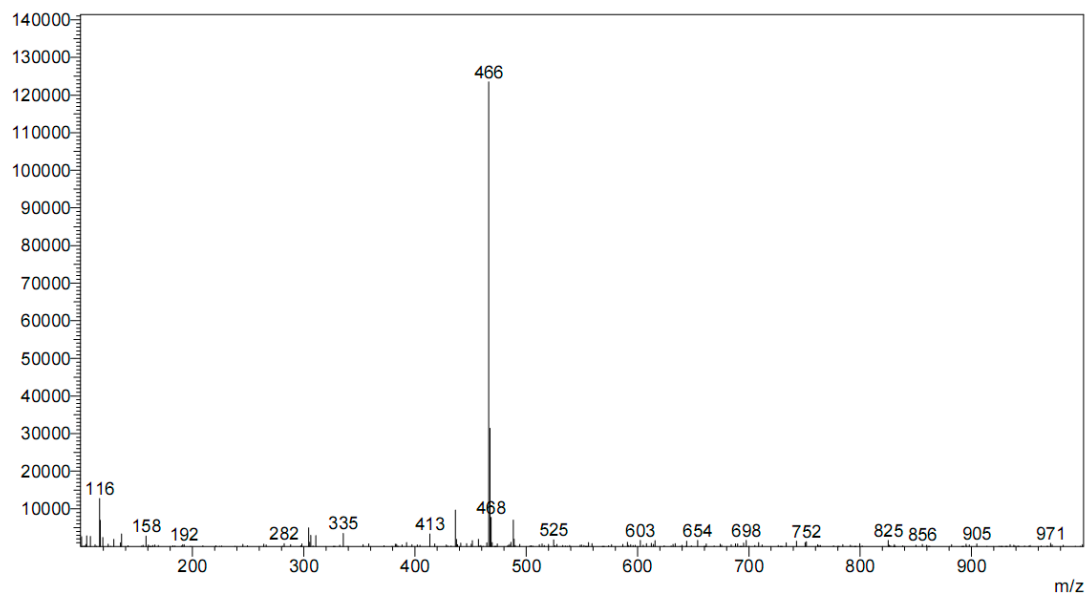

Figure S35. MS-ESI for compound 8.

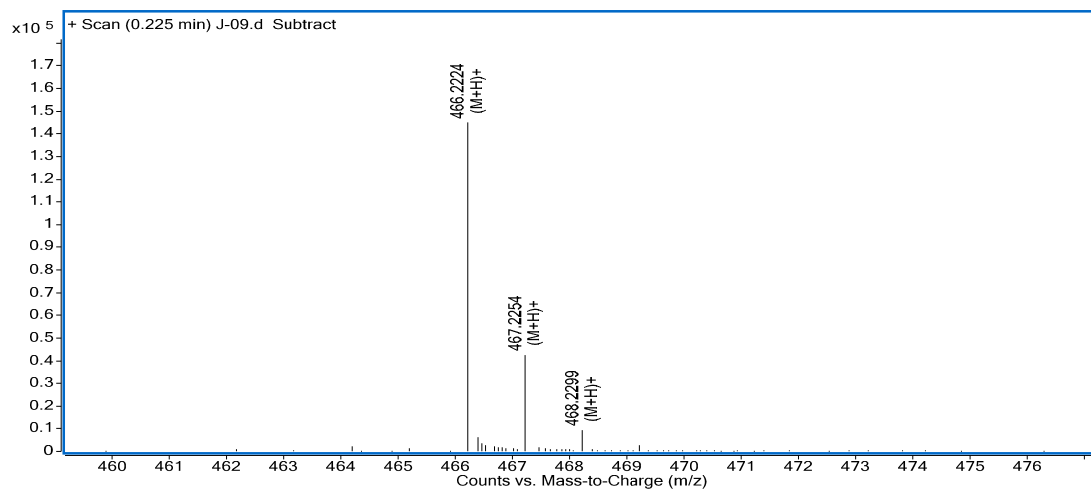

Figure S36. HRMS-ESI for compound 8.

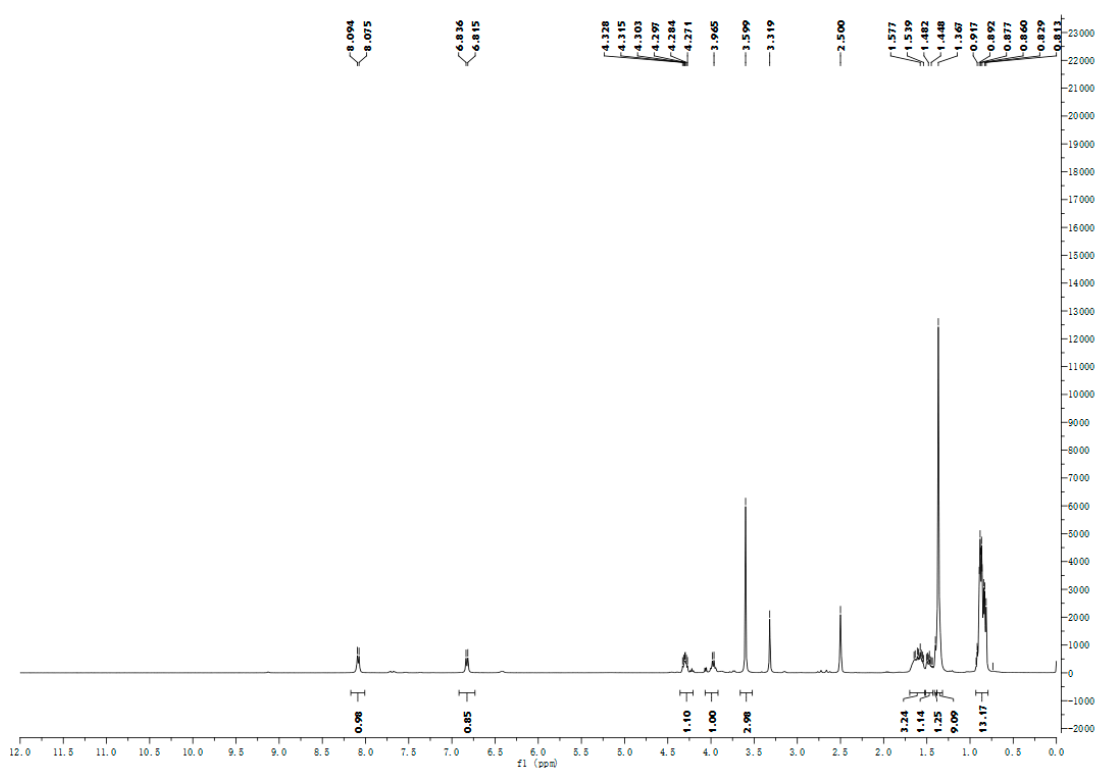

Figure S37. <sup>1</sup>H-NMR for compound Leu-01.

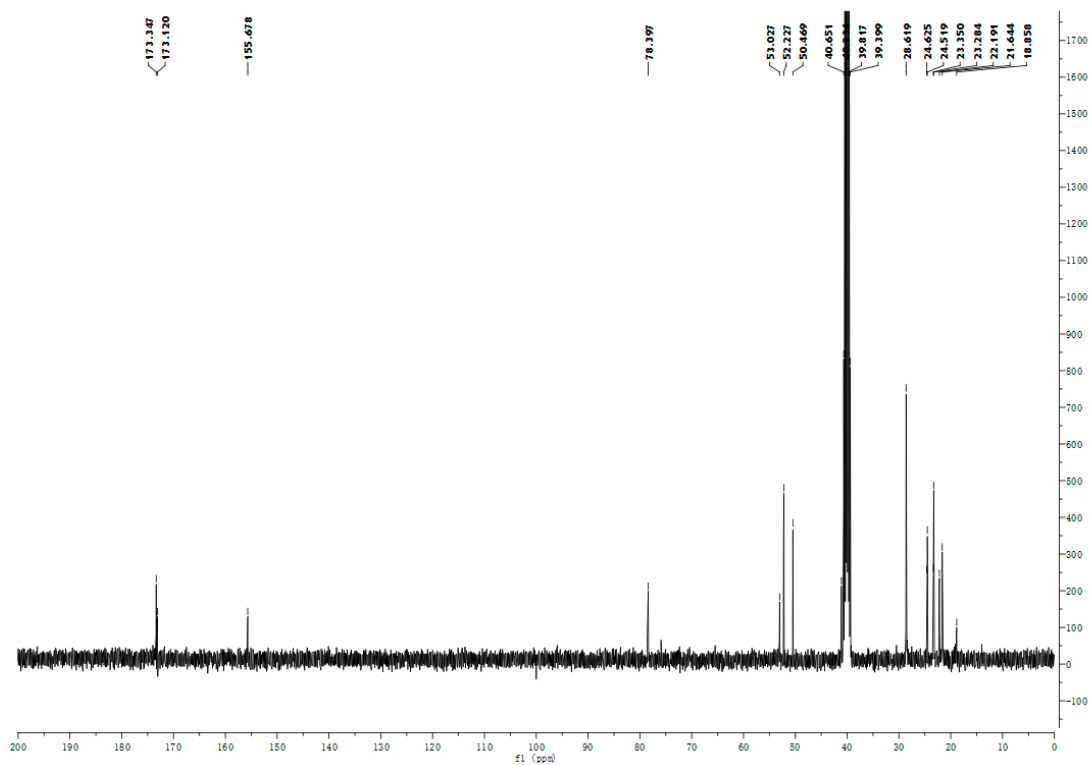

Figure S38.  $^{13}\text{C}$ -NMR for compound Leu-01.

R.Time:0.783(Scan#:95)  
 MassPeaks:545 BasePeak:381(1481153)  
 Spectrum Mode:Single 0.783(95)  
 BG Mode:Averaged 0.042-0.458(6-56) Polarity:Positive Segment 1 - Event 1

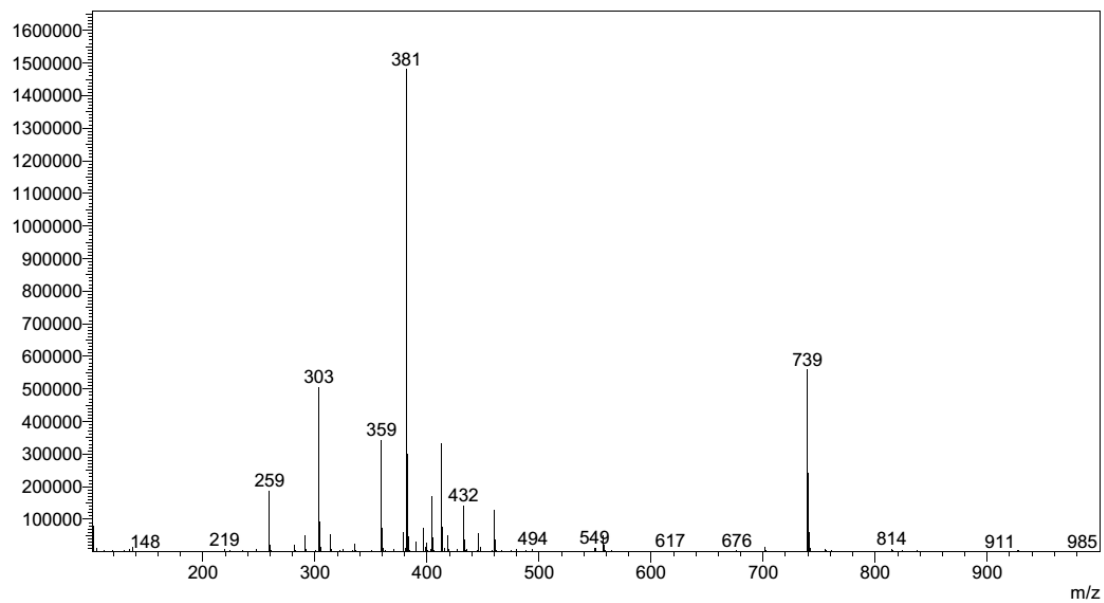

Figure S39. MS-ESI for compound Leu-01.

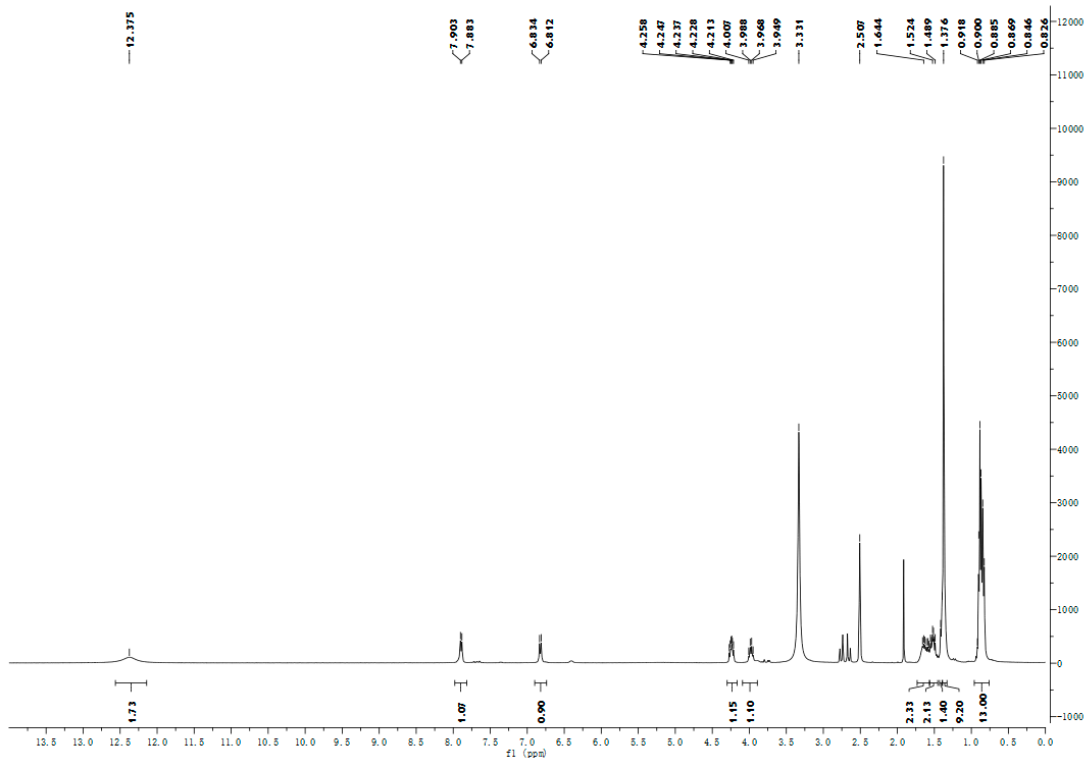

Figure S40. <sup>1</sup>H-NMR for compound Leu-02.

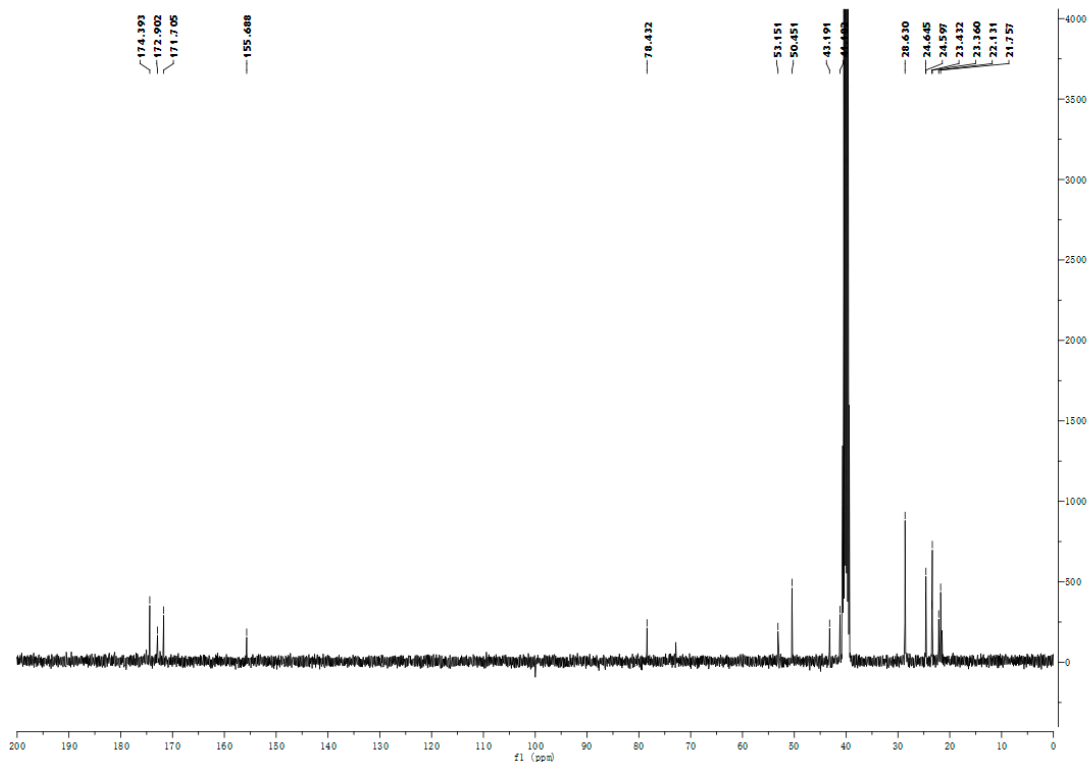

Figure S41. <sup>13</sup>C-NMR for compound Leu-02.

R.Time:0.225(Scan#:28)  
MassPeaks:937 BasePeak:343(839367)  
Spectrum Mode:Single 0.225(28)  
BG Mode:None Polarity:Negative Segment 1 - Event 1

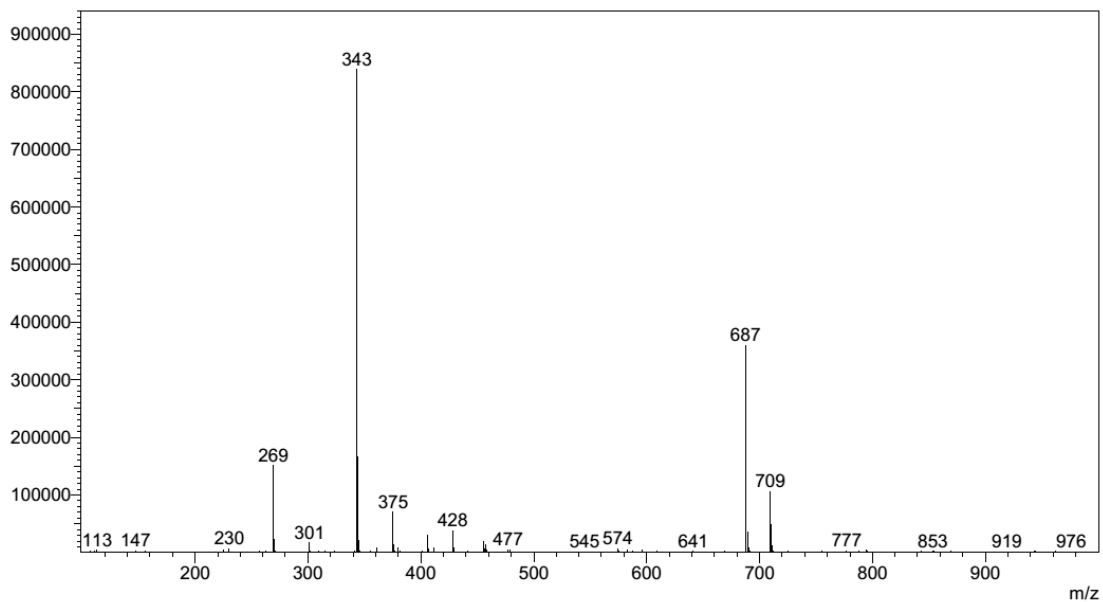

Figure S42. MS-ESI for compound Leu-02.

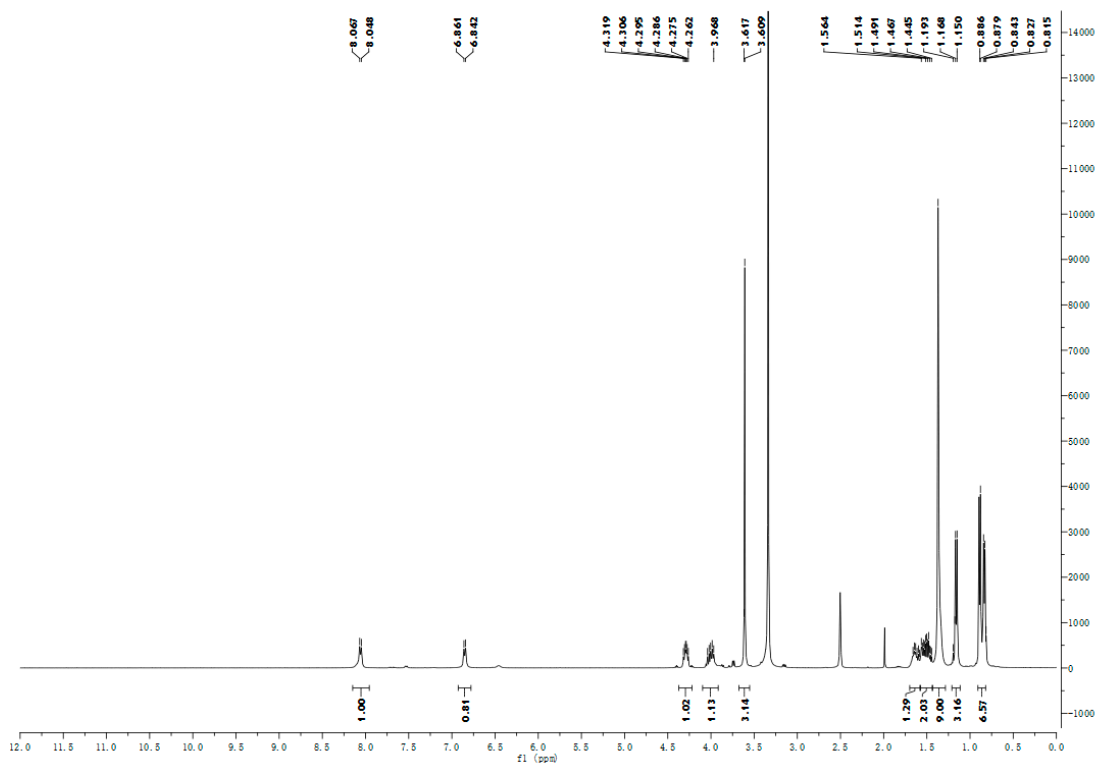

Figure S43. <sup>1</sup>H-NMR for compound Leu-03.

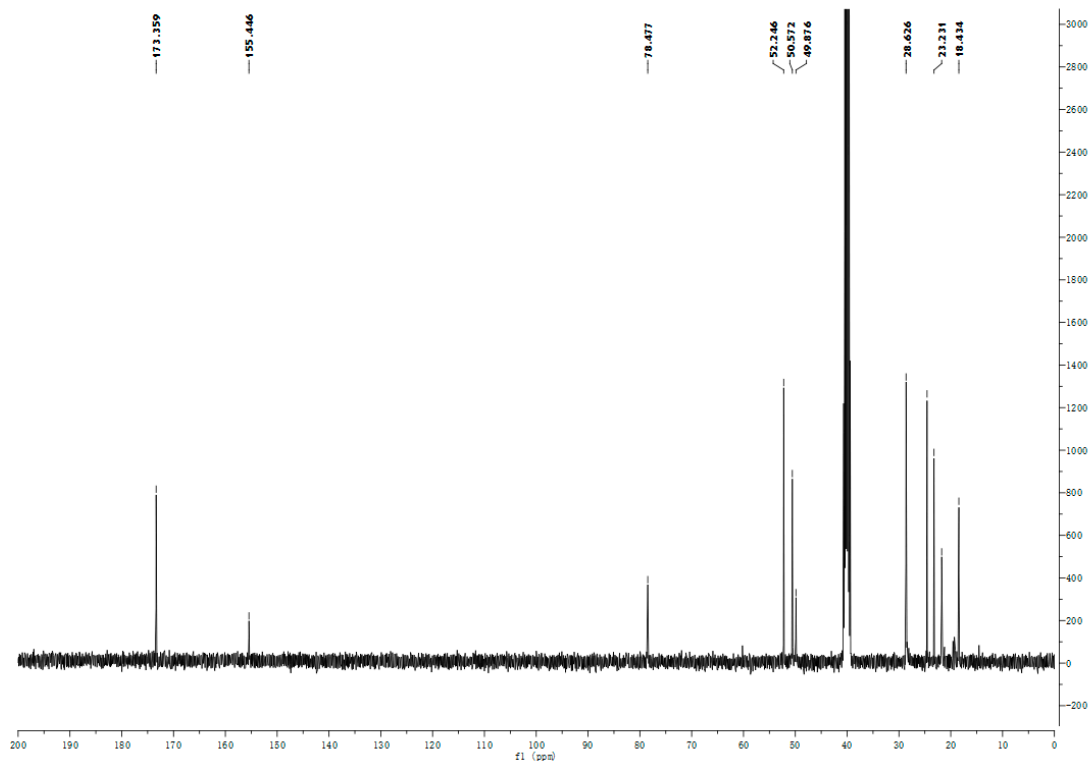

Figure S44. <sup>13</sup>C-NMR for compound Leu-03.

R.Time:0.208(Scan#:26)  
 MassPeaks:963 BasePeak:339(2375134)  
 Spectrum Mode:Single 0.208(26)  
 BG Mode:None Polarity:Positive Segment 1 - Event 1

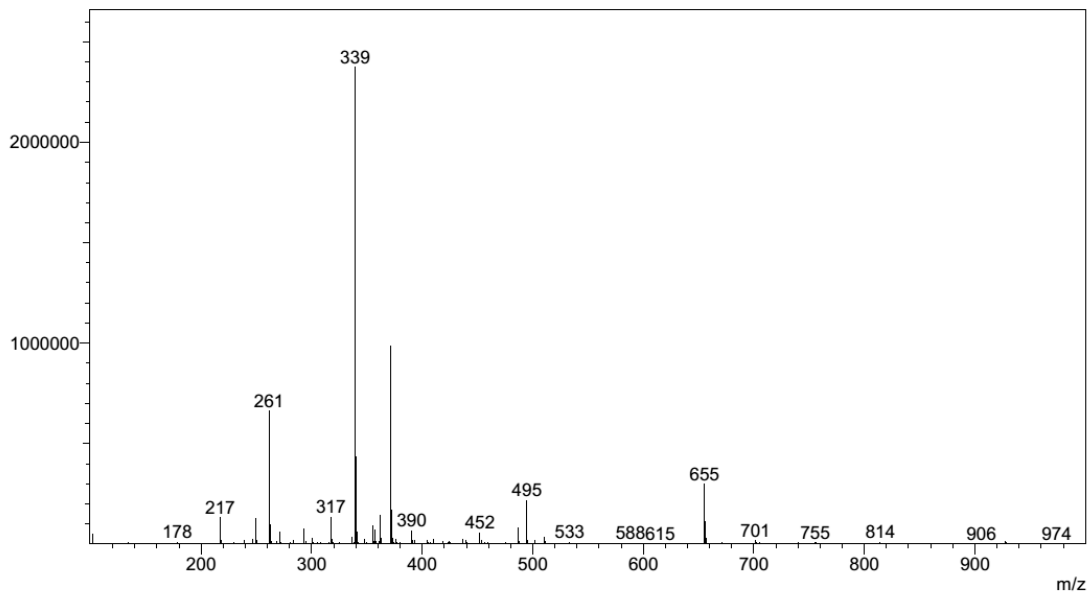

Figure S45. MS-ESI for compound Leu-03.

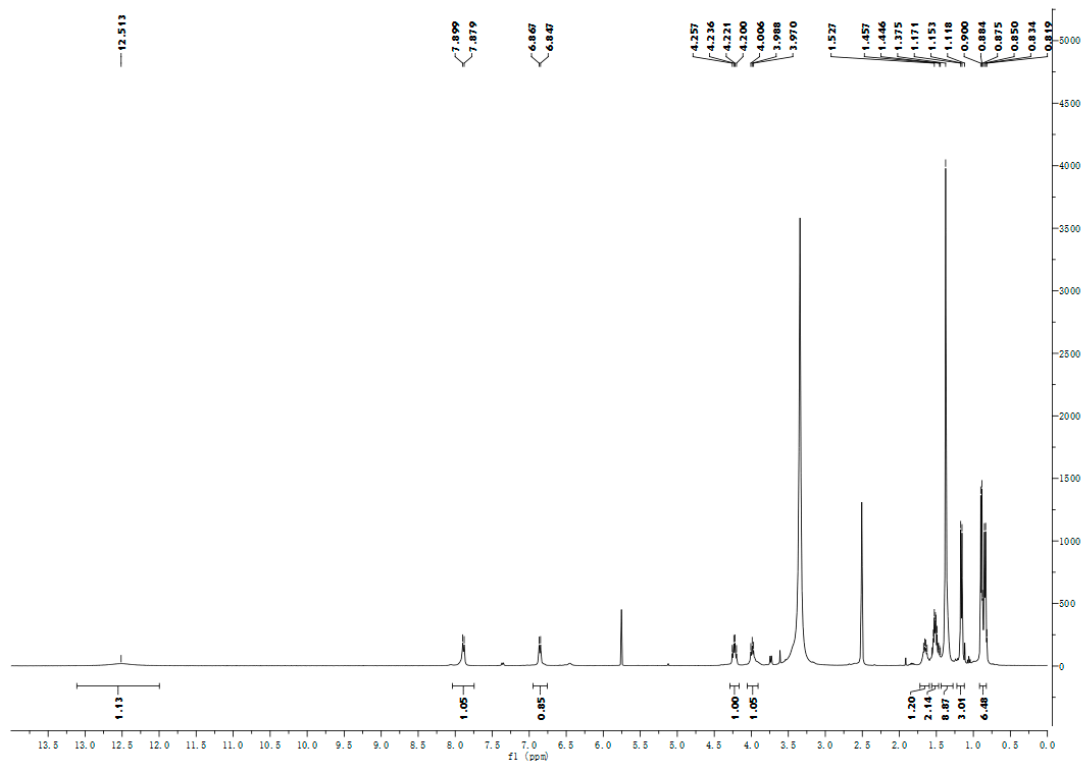

Figure S46. <sup>1</sup>H-NMR for compound Leu-04.

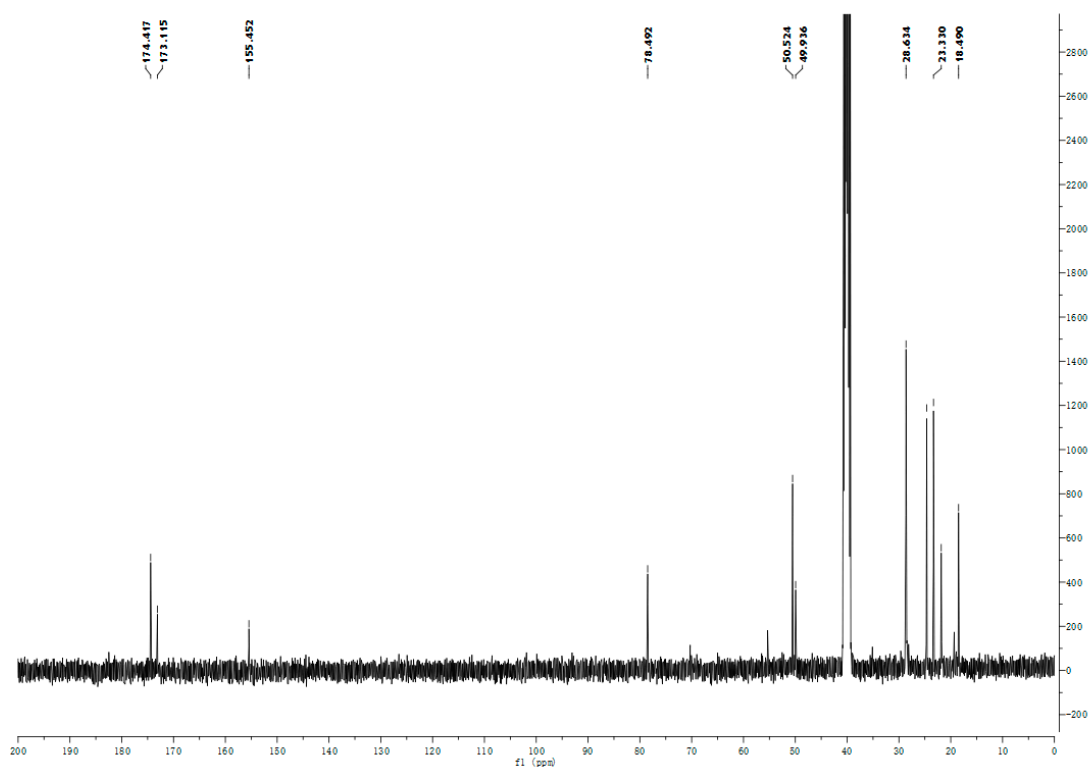

Figure S47. <sup>13</sup>C-NMR for compound Leu-04.

R.Time:0.800(Scan#:97)  
MassPeaks:944 BasePeak:301(204057)  
Spectrum Mode:Single 0.800(97)  
BG Mode:None Polarity:Negative Segment 1 - Event 1

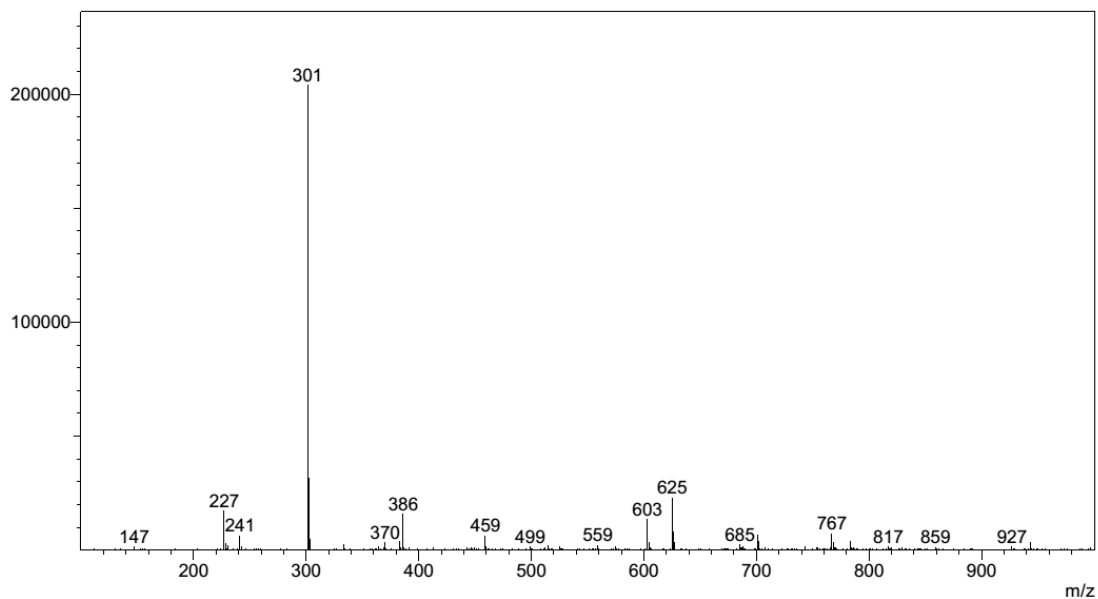

Figure S48. MS-ESI for compound Leu-04.

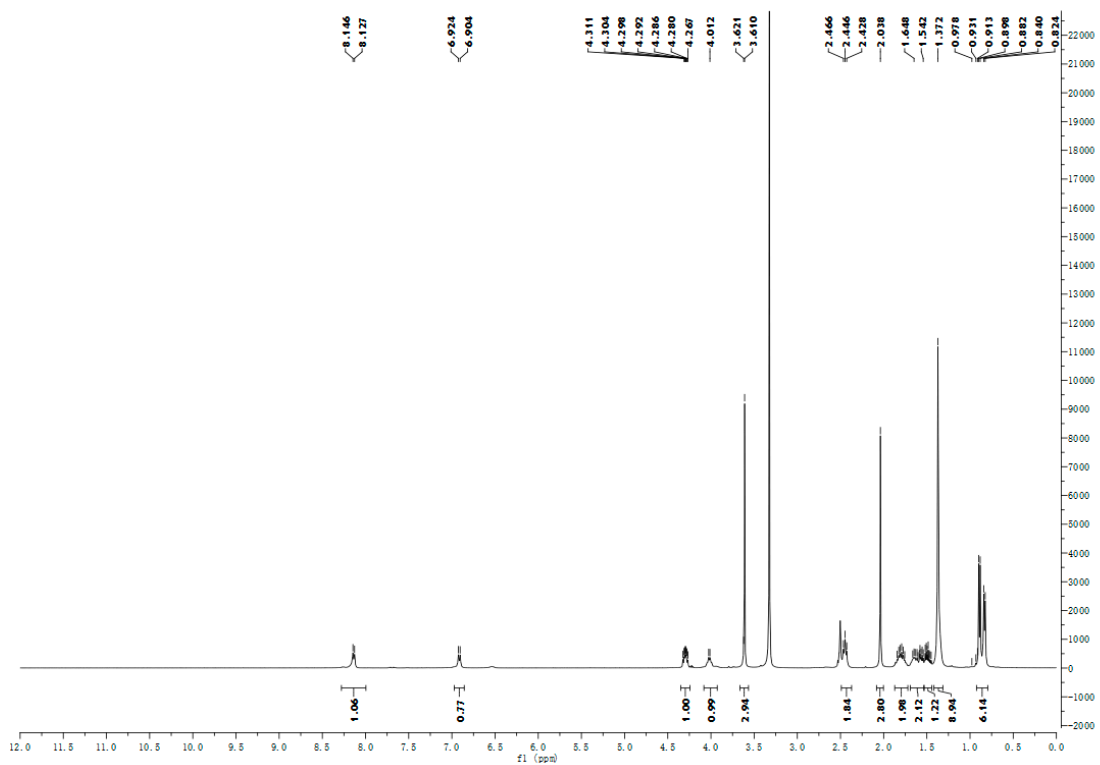

Figure S49. <sup>1</sup>H-NMR for compound Leu-05.



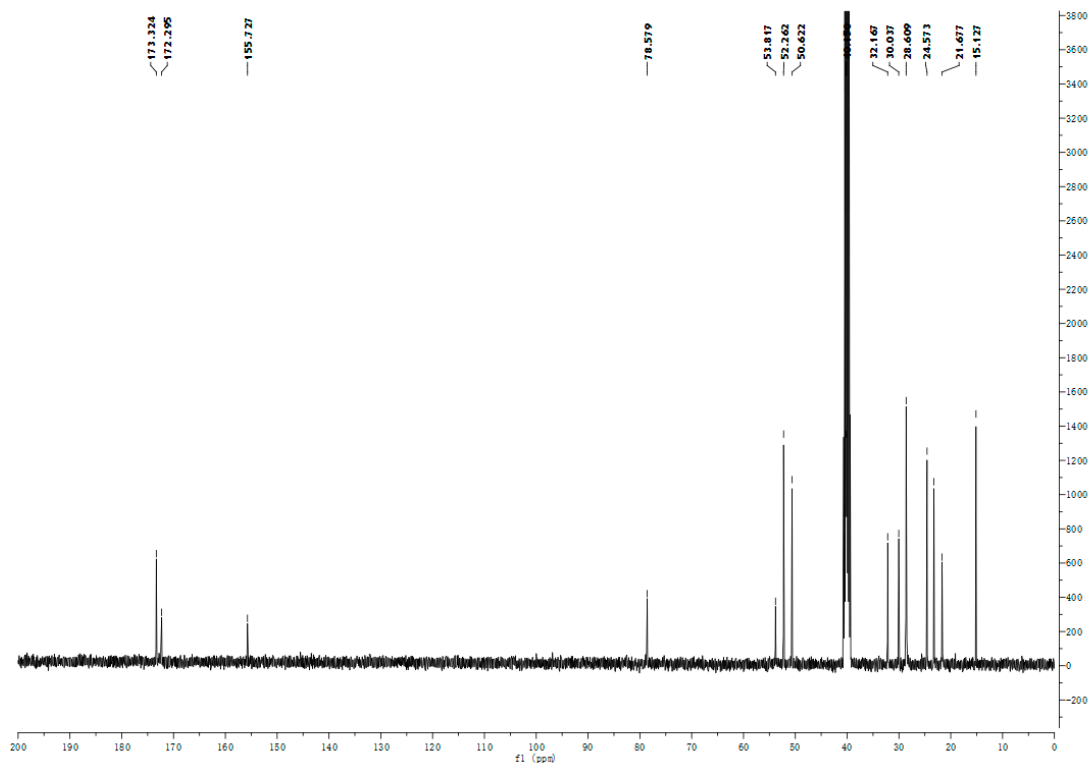

Figure S50.  $^{13}\text{C}$ -NMR for compound Leu-05.

R.Time:0.242(Scan#:30)  
 MassPeaks:552 BasePeak:399(2512602)  
 Spectrum Mode:Single 0.242(30)  
 BG Mode:Averaged 0.008-0.142(2-18) Polarity:Positive Segment 1 - Event 1

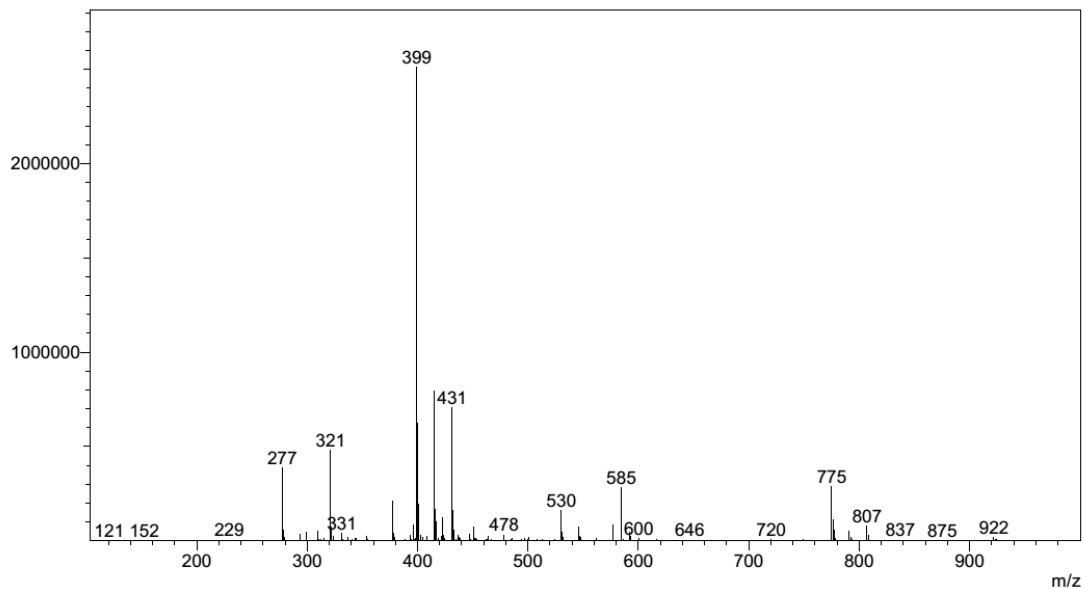

Figure S51. MS-ESI for compound Leu-05.

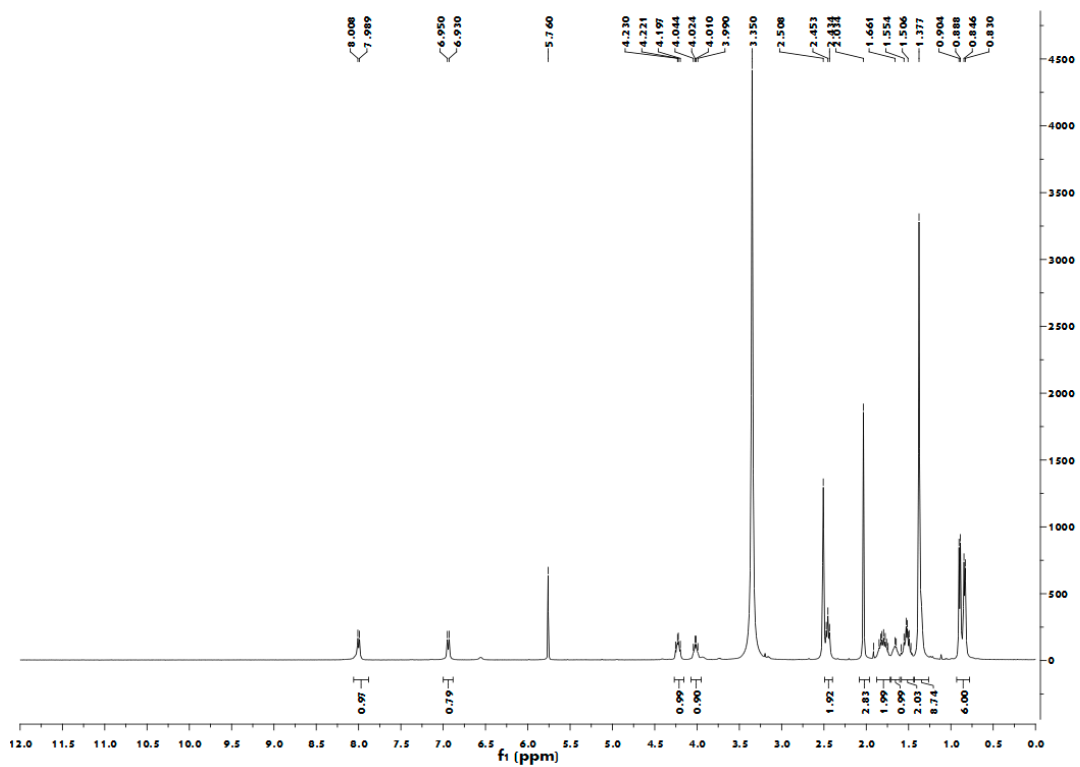

Figure S52. <sup>1</sup>H-NMR for compound Leu-06.

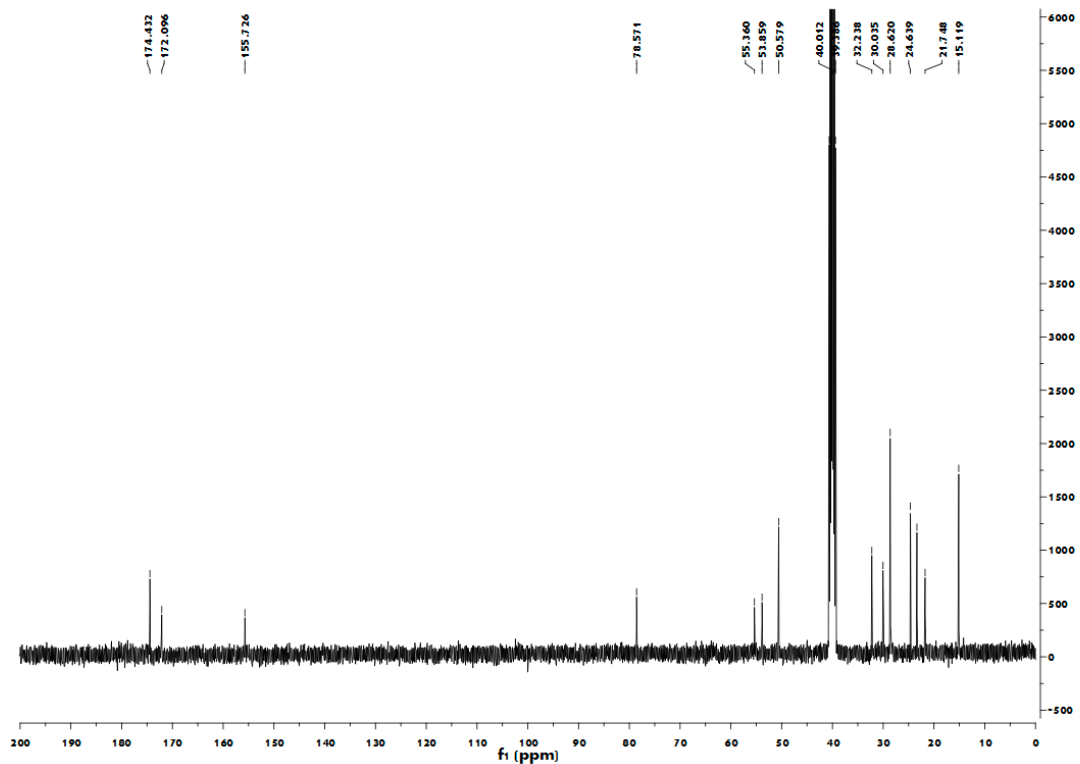

Figure S53. <sup>13</sup>C-NMR for compound Leu-06.

R.Time:0.783(Scan#:95)  
MassPeaks:915 BasePeak:361(230340)  
Spectrum Mode:Single 0.783(95)  
BG Mode:None Polarity:Negative Segment 1 - Event 1

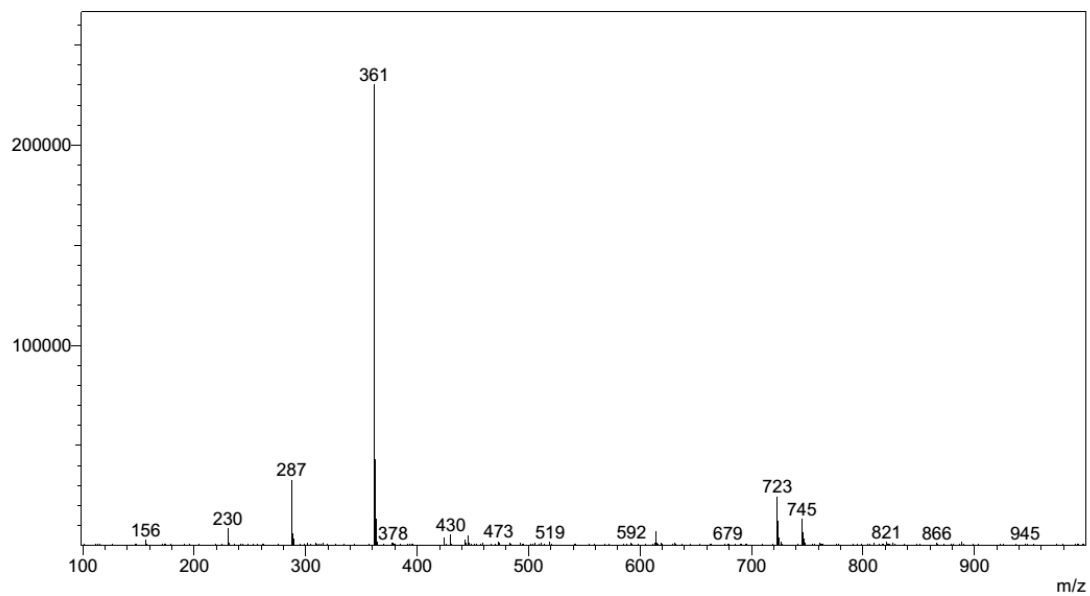

Figure S54. MS-ESI for compound Leu-06.

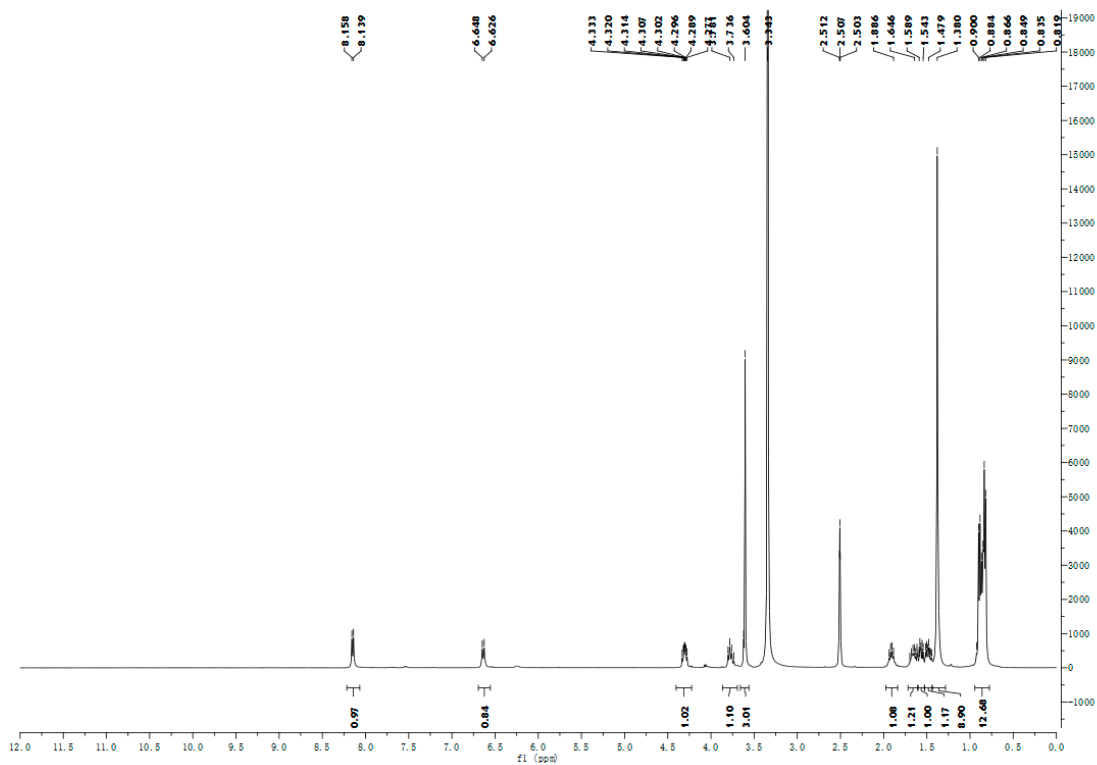

Figure S55. <sup>1</sup>H-NMR for compound Leu-07.

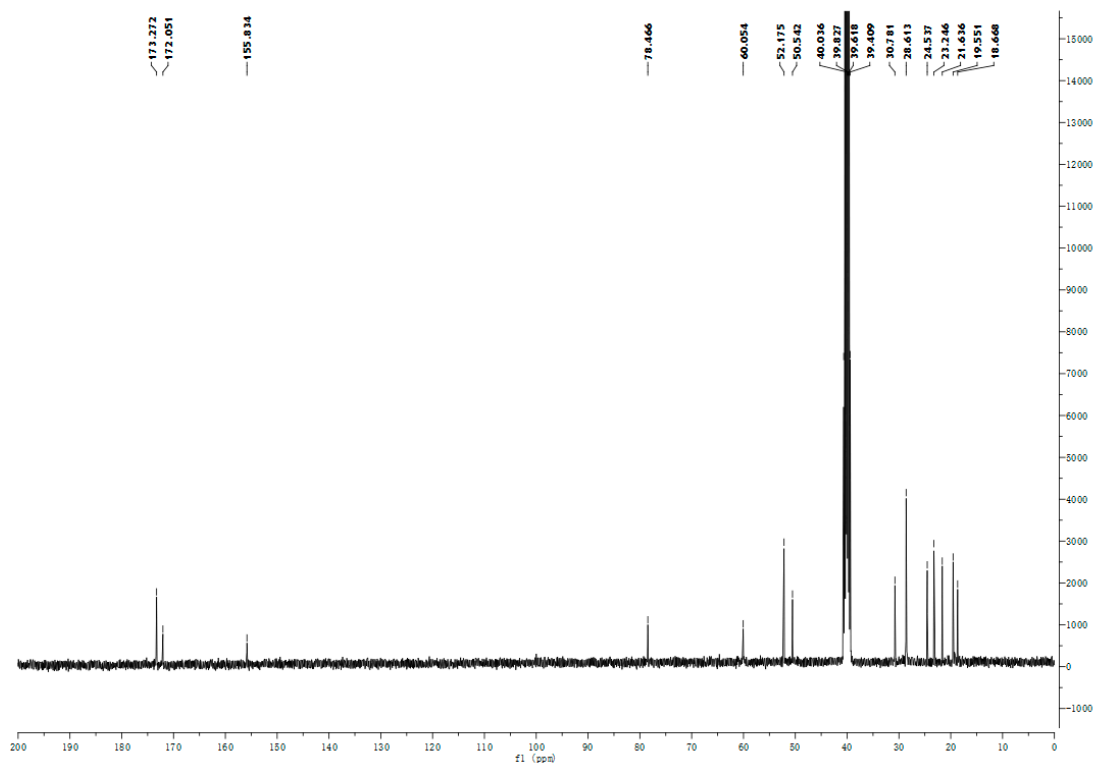

Figure S56.  $^{13}\text{C}$ -NMR for compound Leu-07.

R.Time:0.225(Scan#:28)  
 MassPeaks:944 BasePeak:367(3256550)  
 Spectrum Mode:Single 0.225(28)  
 BG Mode:None Polarity:Positive Segment 1 - Event 1

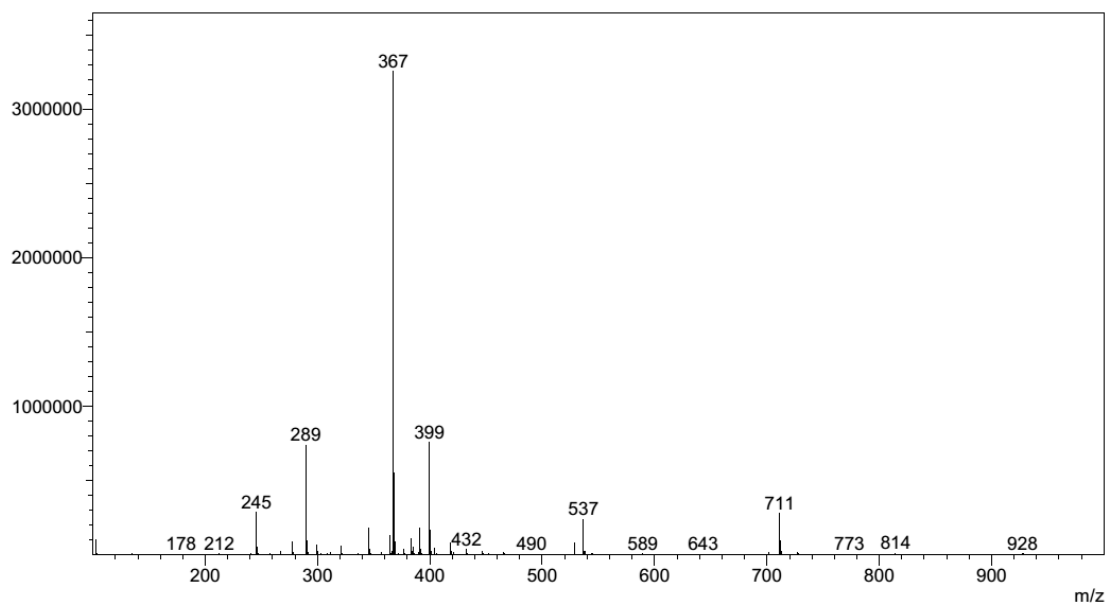

Figure S57. MS-ESI for compound Leu-07.

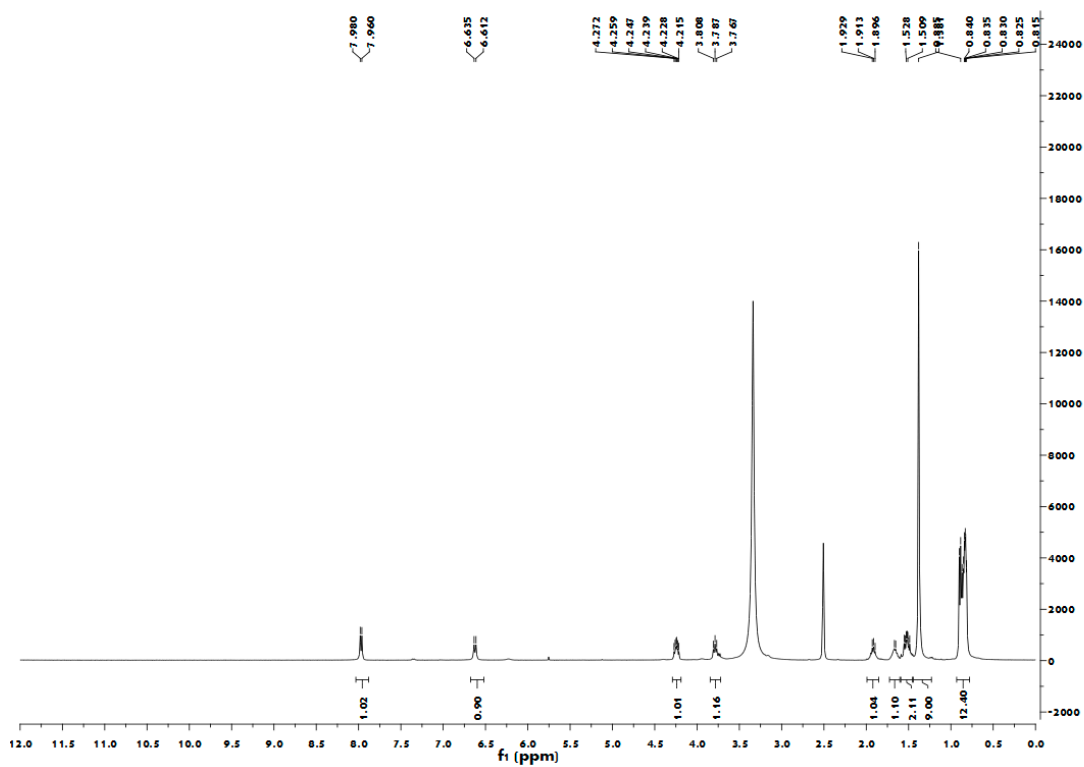

Figure S58. <sup>1</sup>H-NMR for compound Leu-08.

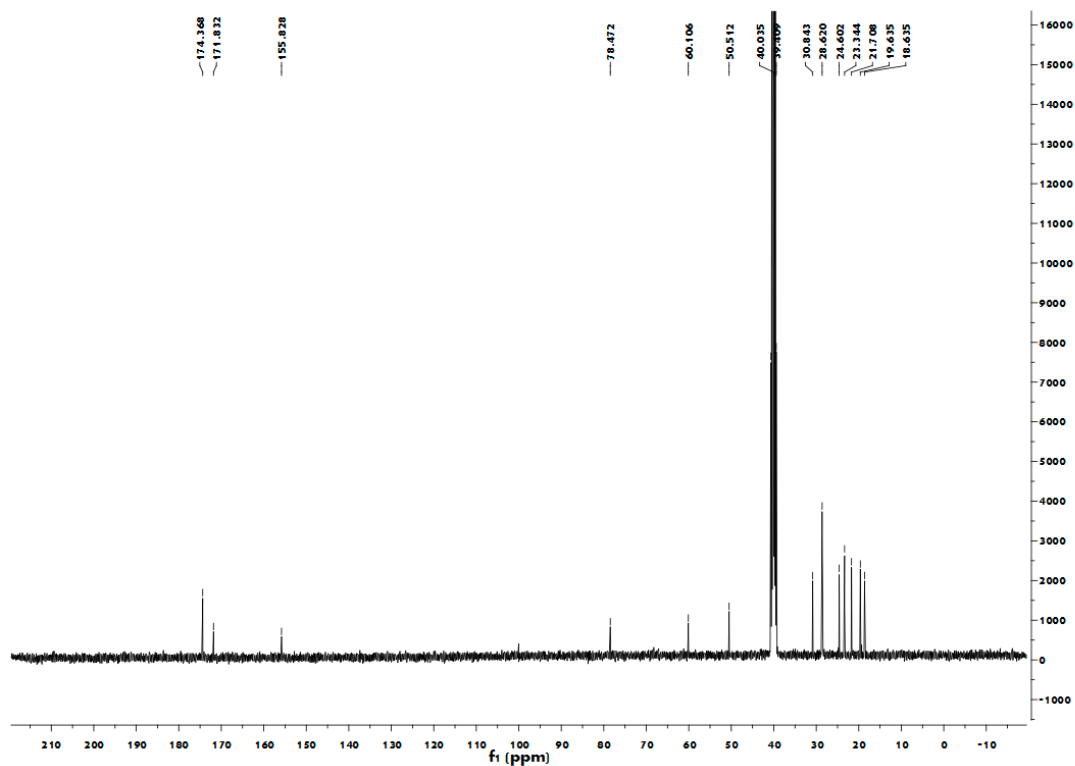

Figure S59. <sup>13</sup>C-NMR for compound Leu-08.

R.Time:0.200(Scan#:25)  
MassPeaks:939 BasePeak:329(1065062)  
Spectrum Mode:Single 0.200(25)  
BG Mode:None Polarity:Negative Segment 1 - Event 1

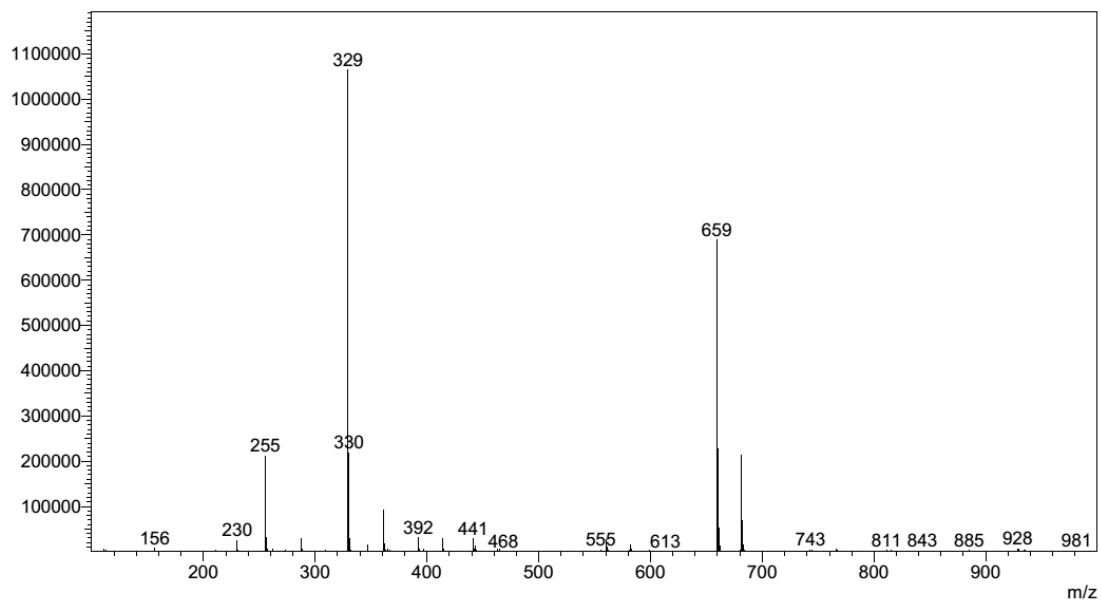

Figure S60. MS-ESI for compound Leu-08.

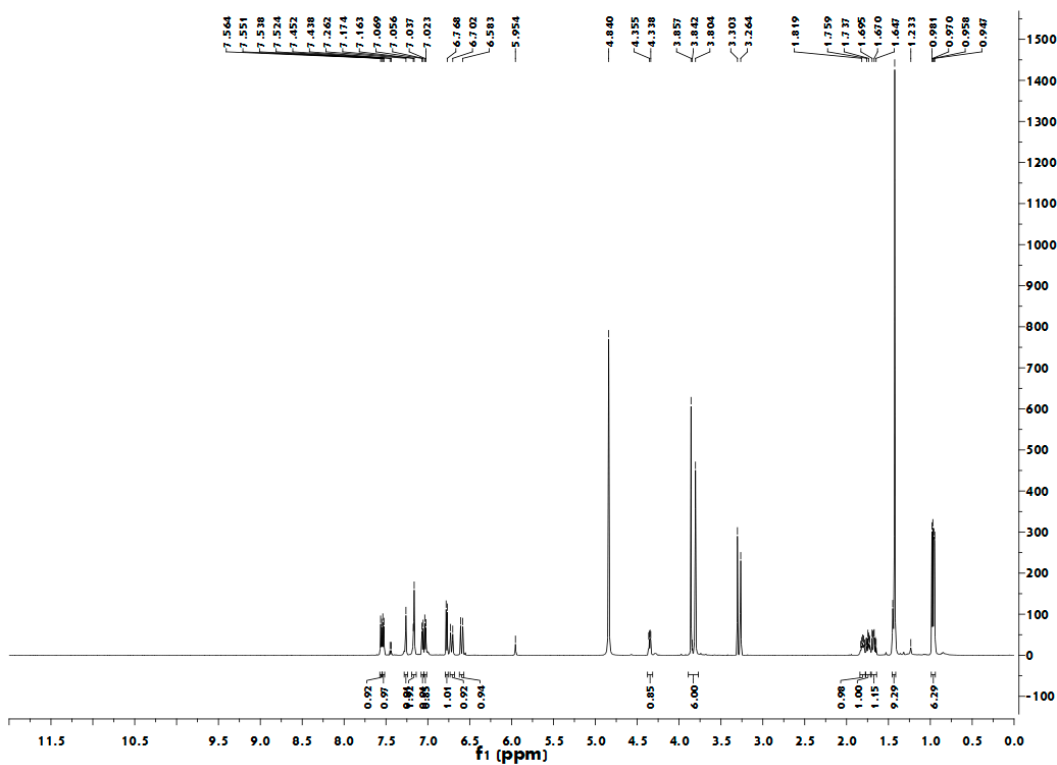

Figure S61. <sup>1</sup>H-NMR for compound 9.

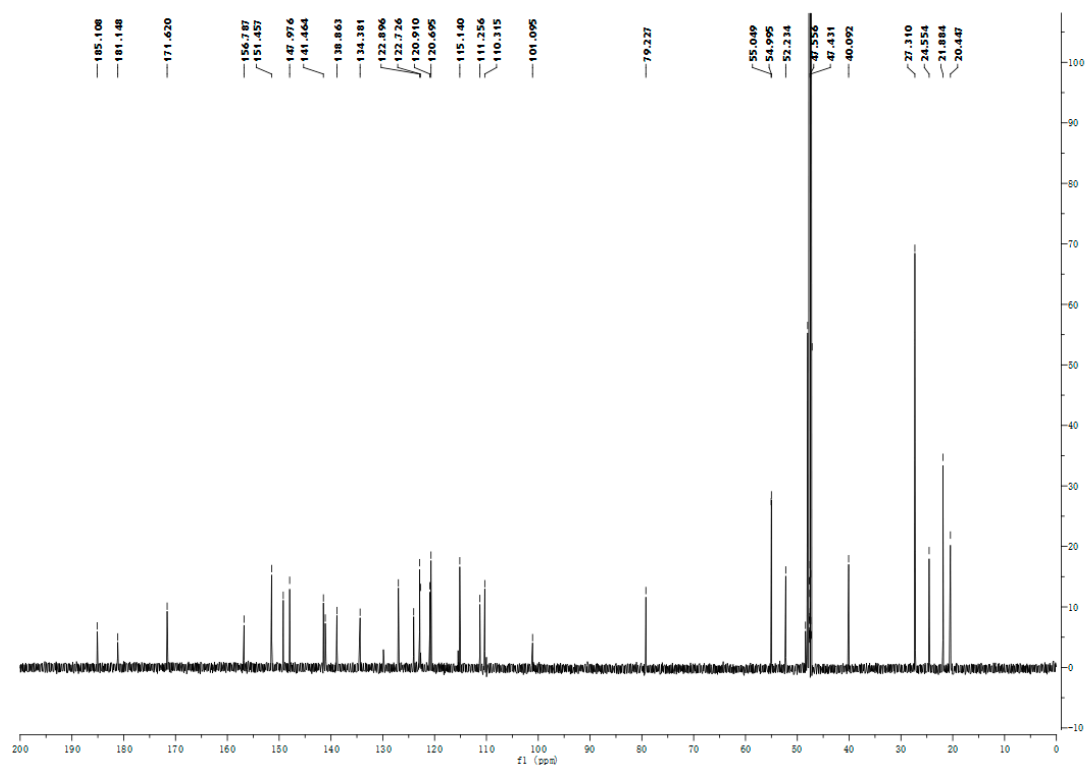

Figure S62.  $^{13}\text{C}$ -NMR for compound 9.

R. Time: 0.375 (Scan#: 46)  
 Mass Peaks: 502 Base Peak: 580 (48435)  
 Spectrum Mode: Single 0.375 (46)  
 BG Mode: Averaged 0.033-0.283 (5-35) Polarity: Negative Segment 1 - Event 1

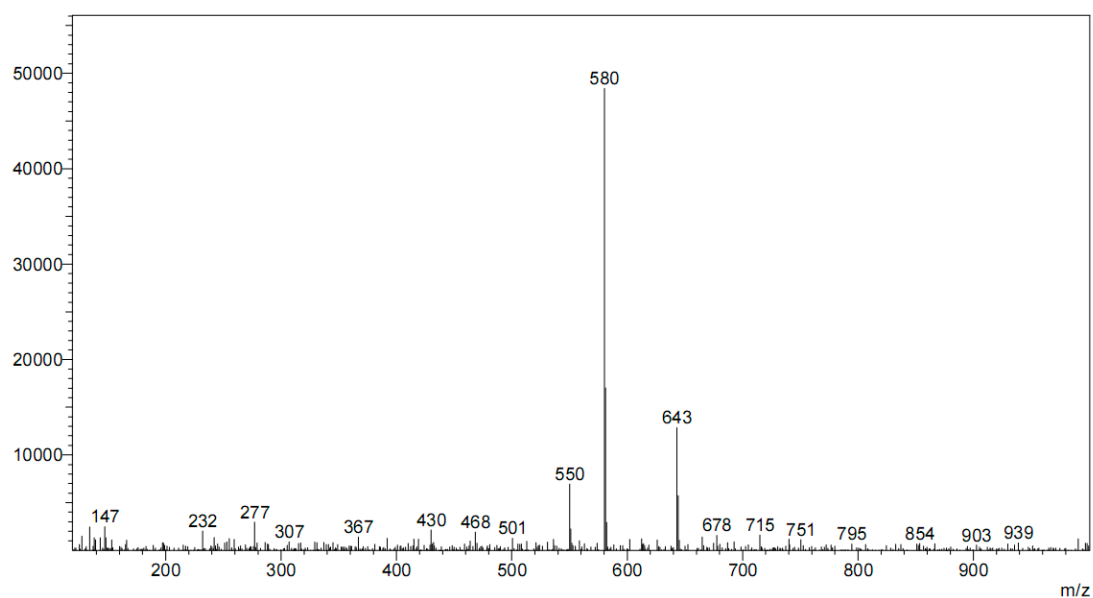

Figure S63. MS-ESI for compound 9.

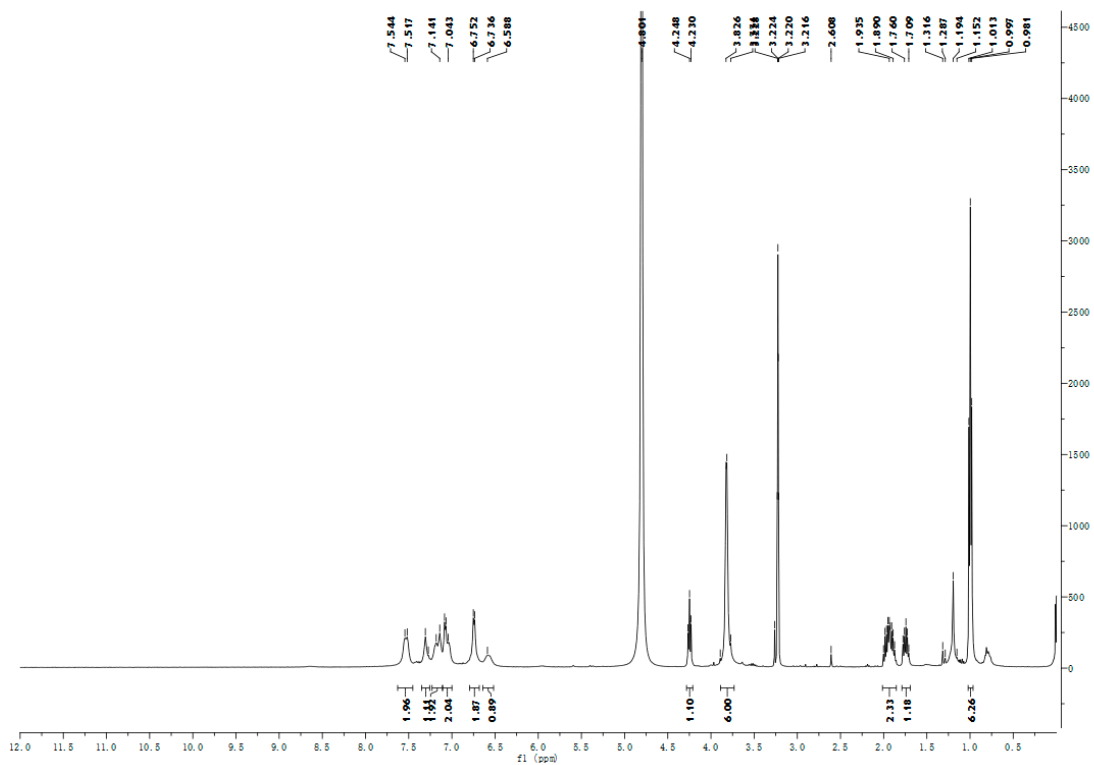

Figure S64.  $^1\text{H-NMR}$  for compound 10.

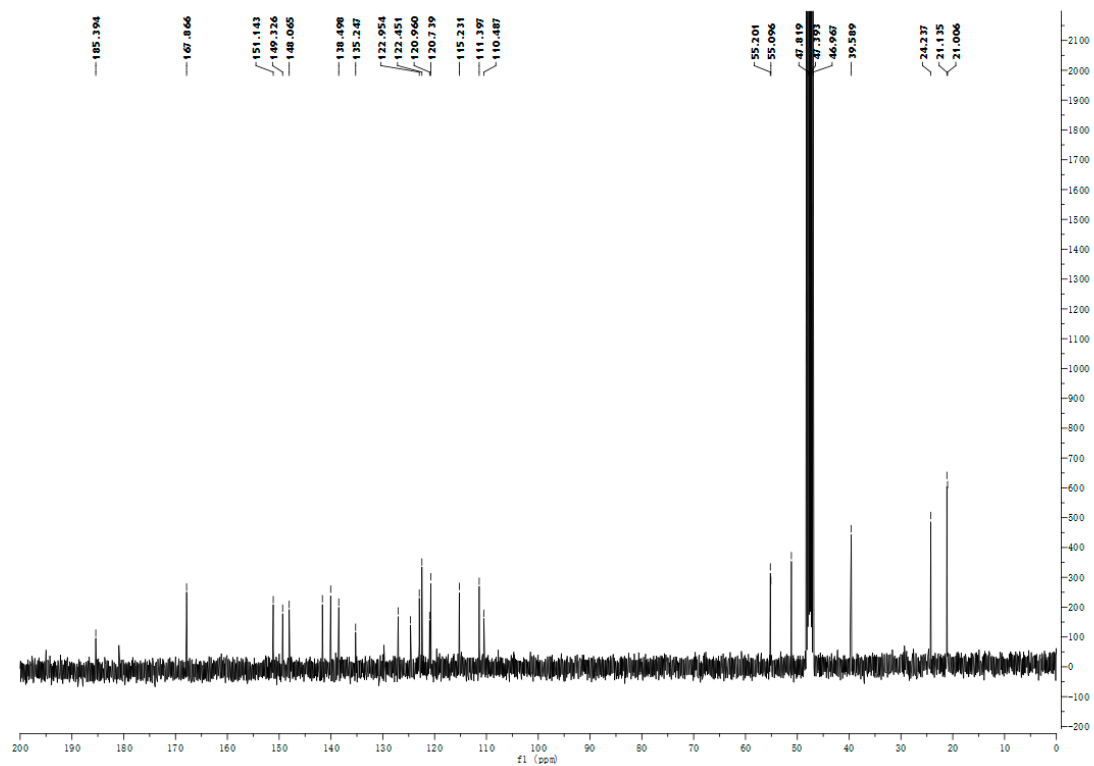

Figure S65.  $^{13}\text{C-NMR}$  for compound 10.



R. Time: 0.175 (Scan#: 22)  
Mass Peaks: 500 Base Peak: 480 (62993)  
Spectrum Mode: Single 0.175 (22)  
BG Mode: Averaged 0.242-0.617 (30-75) Polarity: Negative Segment 1 - Event 1

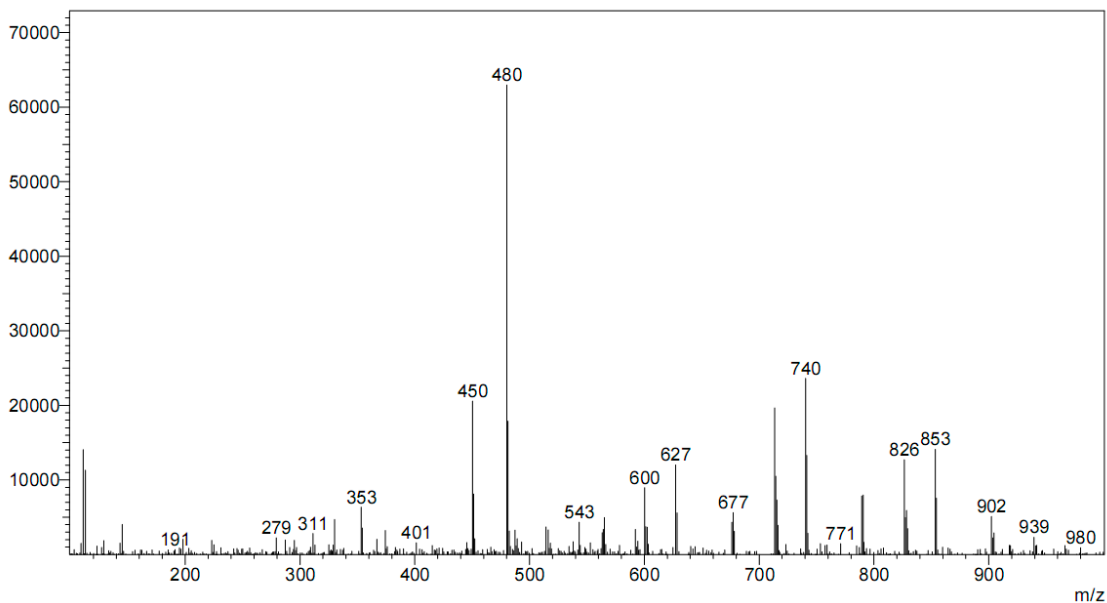

Figure S66. MS-ESI for compound 10.

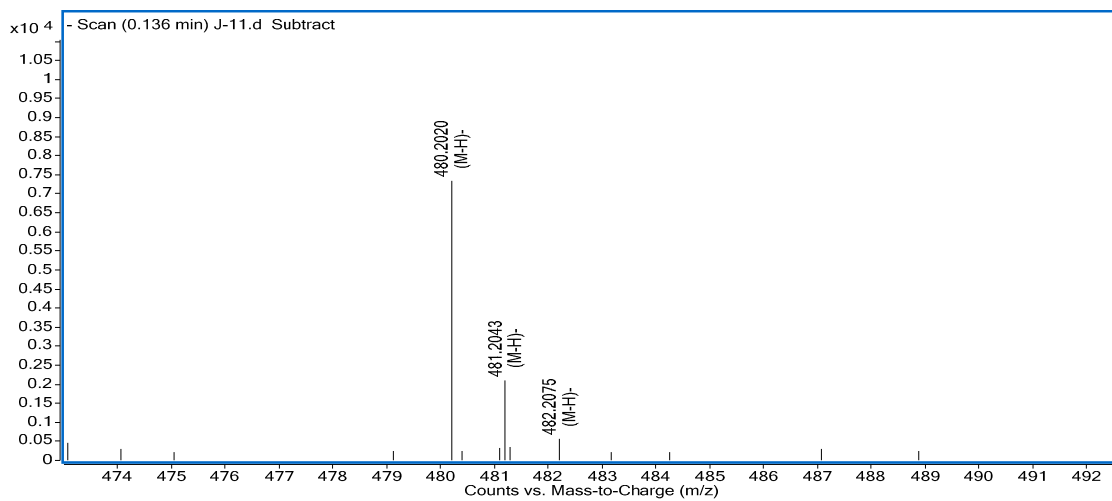

Figure S67. HRMS-ESI for compound 10.

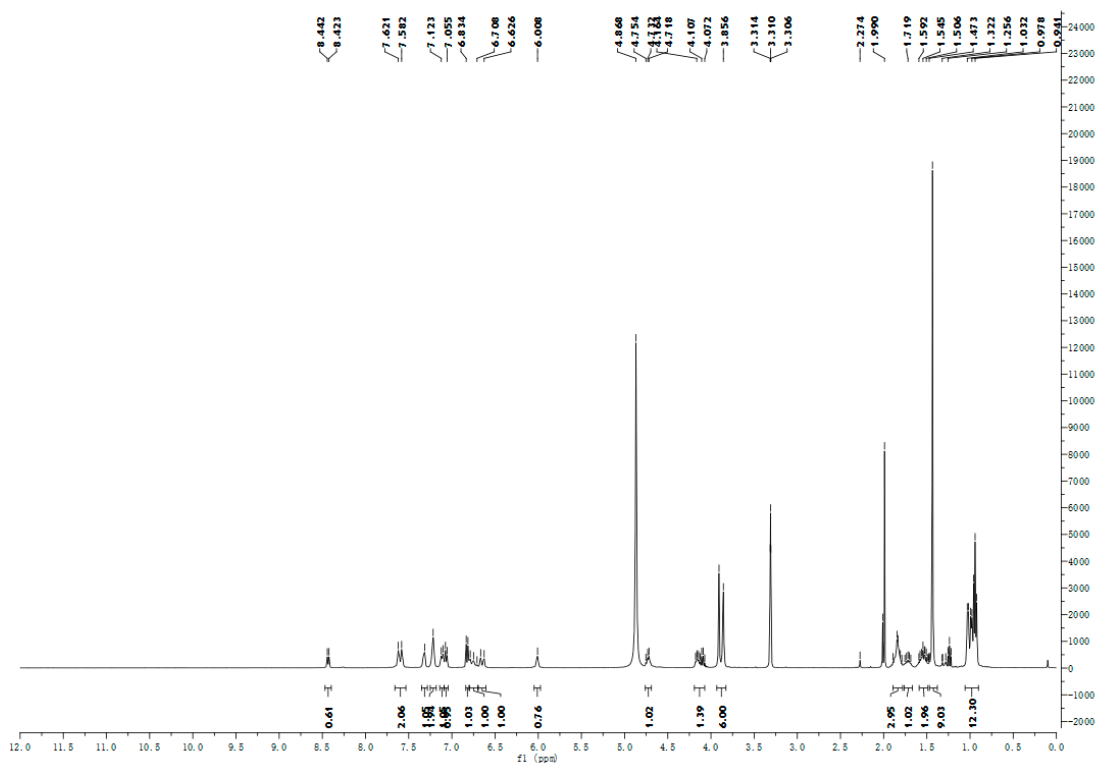

Figure S68.  $^1\text{H-NMR}$  for compound 11.

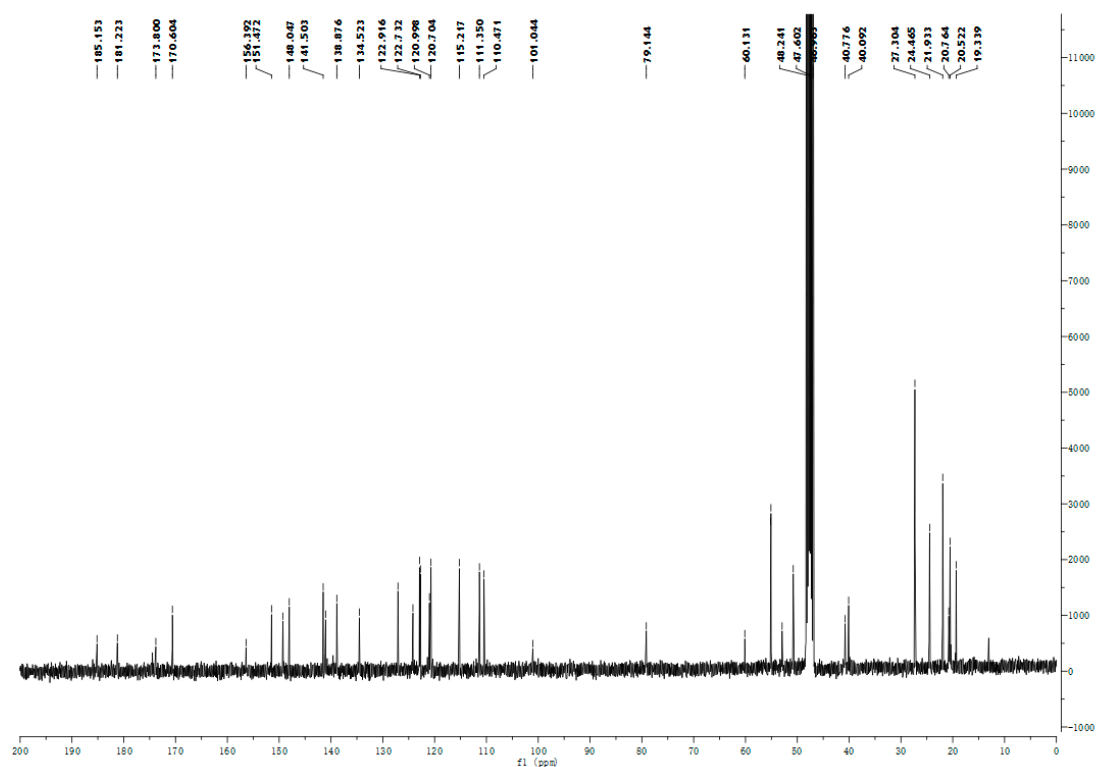

Figure S69.  $^{13}\text{C-NMR}$  for compound 11.

R.Time:0.867(Scan#:105)  
MassPeaks:663 BasePeak:756(79972)  
Spectrum Mode:Single 0.867(105)  
BG Mode:Averaged 0.008-0.700(2-85) Polarity:Negative Segment 1 - Event 1

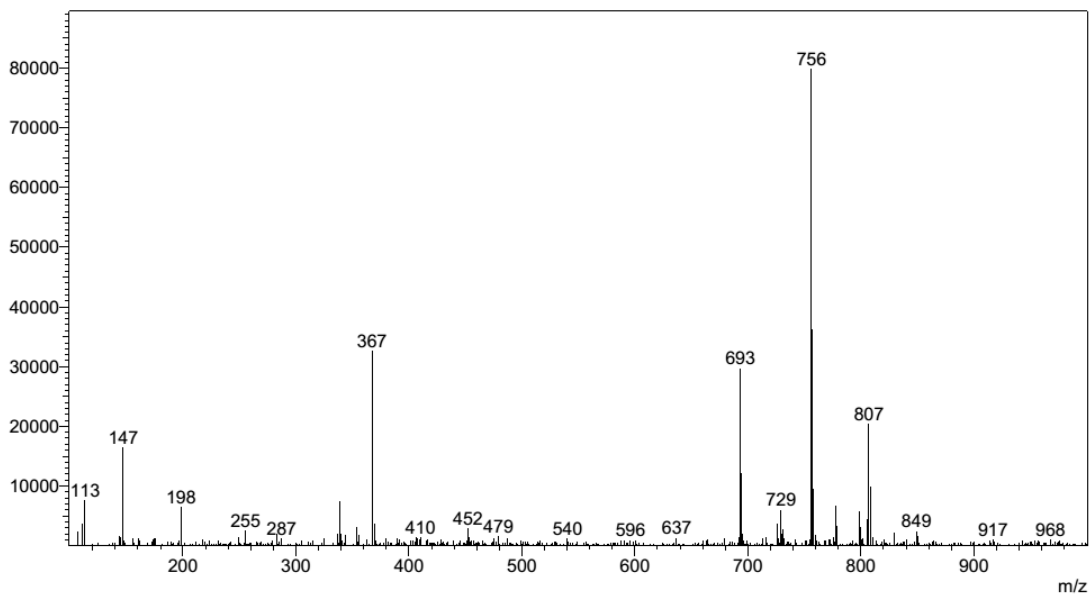

Figure S70. MS-ESI for compound 11.

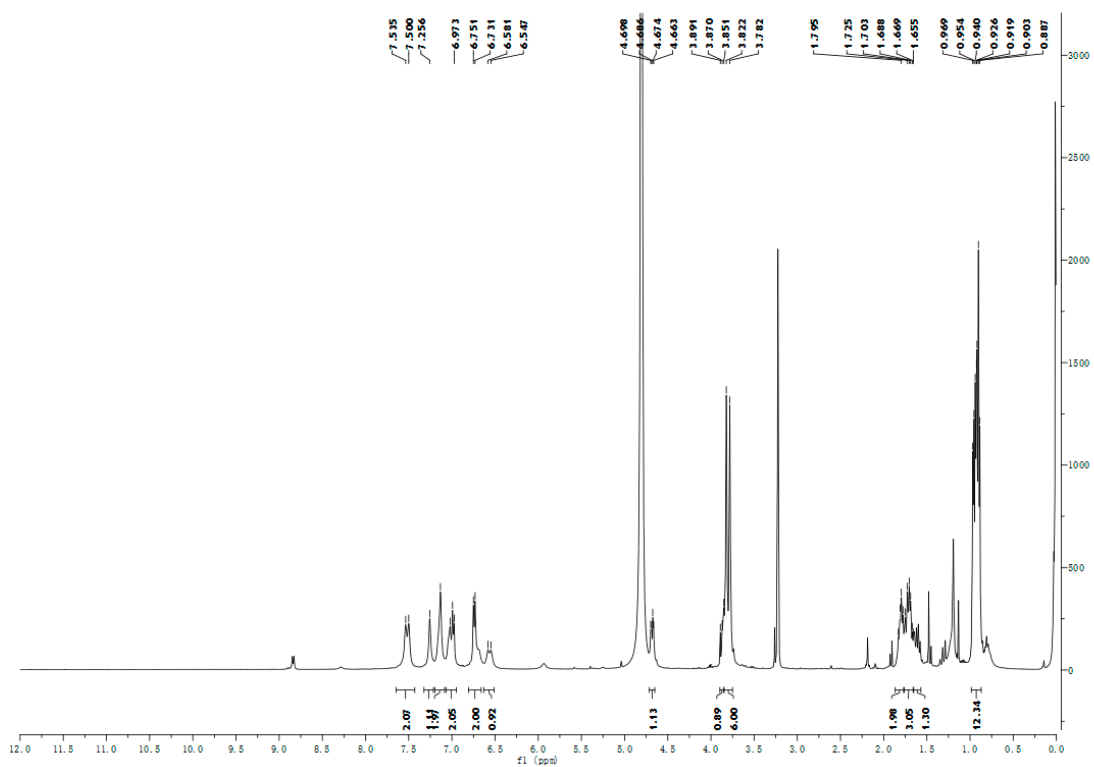

Figure S71. <sup>1</sup>H-NMR for compound 12.

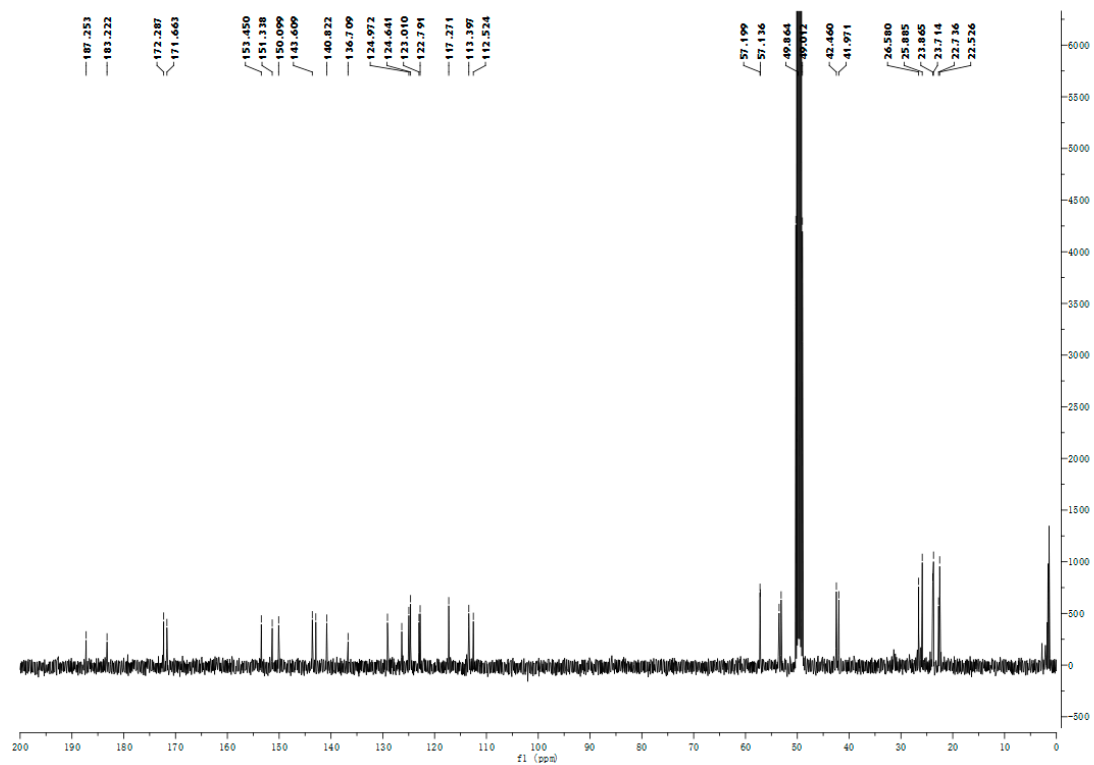

Figure S72. <sup>13</sup>C-NMR for compound 12.

R.Time:0.900(Scan#:109)  
 MassPeaks:635 BasePeak:595(359918)  
 Spectrum Mode:Single 0.900(109)  
 BG Mode:Averaged 0.025-0.700(4-85) Polarity:Positive Segment 1 - Event 1

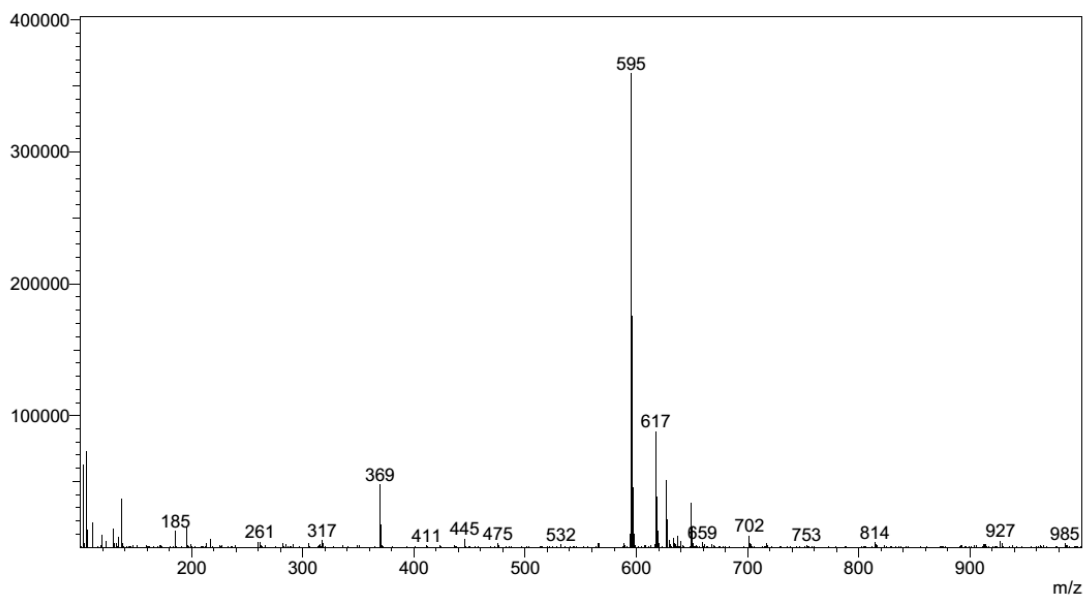

Figure S73. MS-ESI for compound 12.

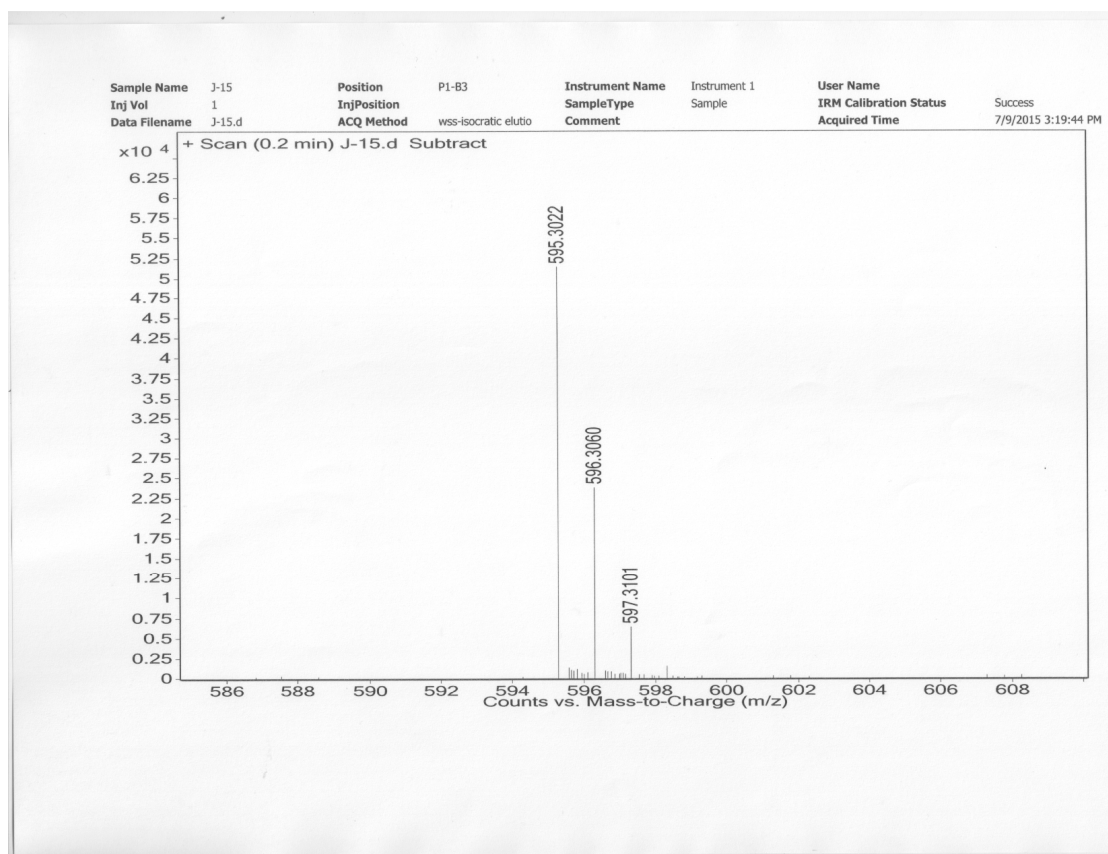

Figure S74. HRMS-ESI for compound 12.

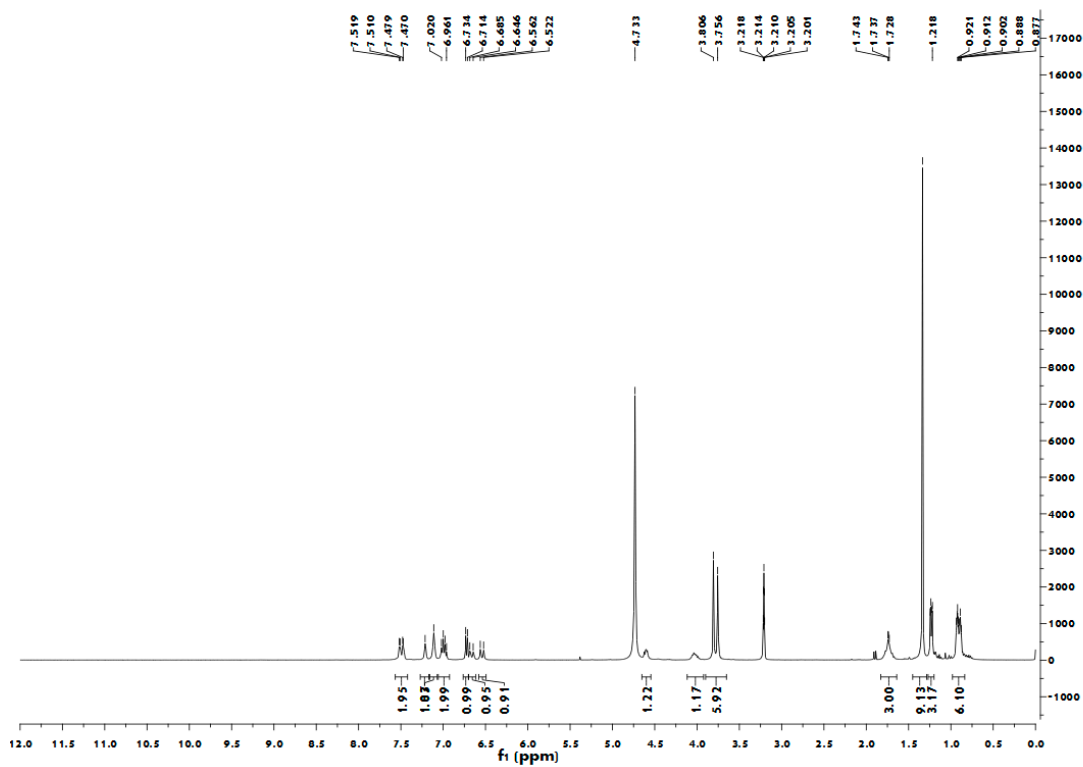

Figure S75. <sup>1</sup>H-NMR for compound 13.

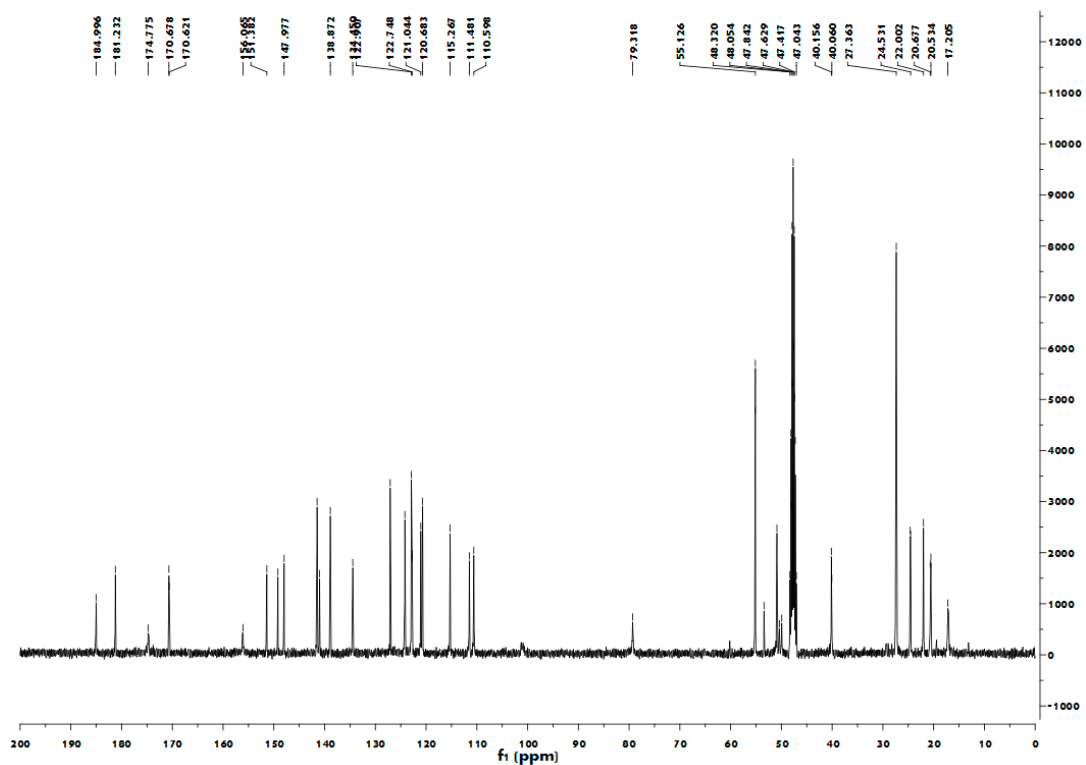

Figure S76. <sup>13</sup>C-NMR for compound 13.

R.Time:0.292(Scan#:36)  
 MassPeaks:467 BasePeak:367(31008)  
 Spectrum Mode:Single 0.292(36)  
 BG Mode:Averaged 0.008-0.150(2-19) Polarity:Negative Segment 1 - Event 1

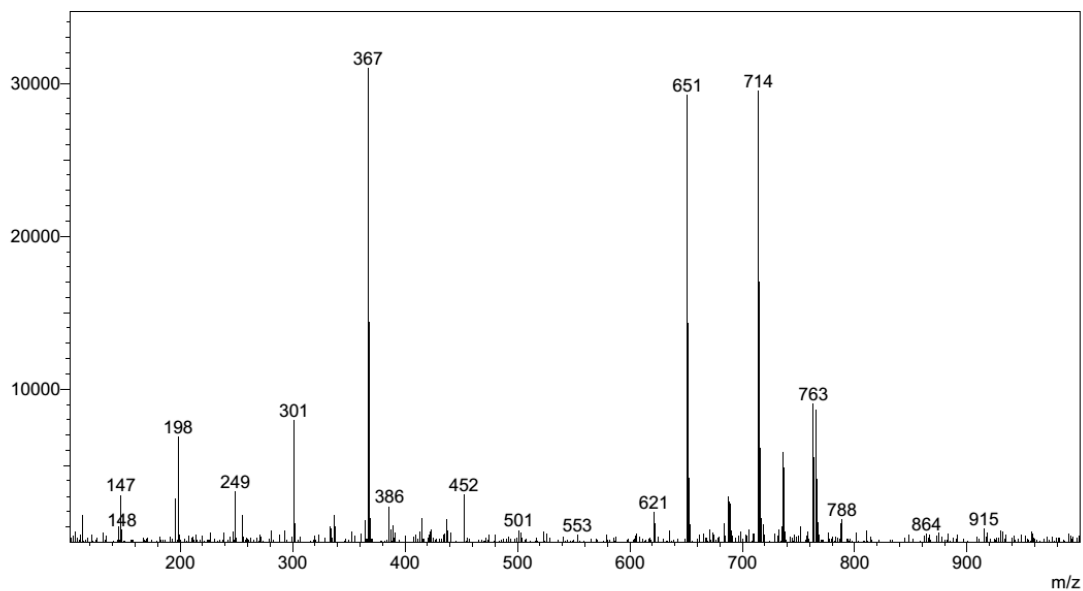

Figure S77. MS-ESI for compound 13.

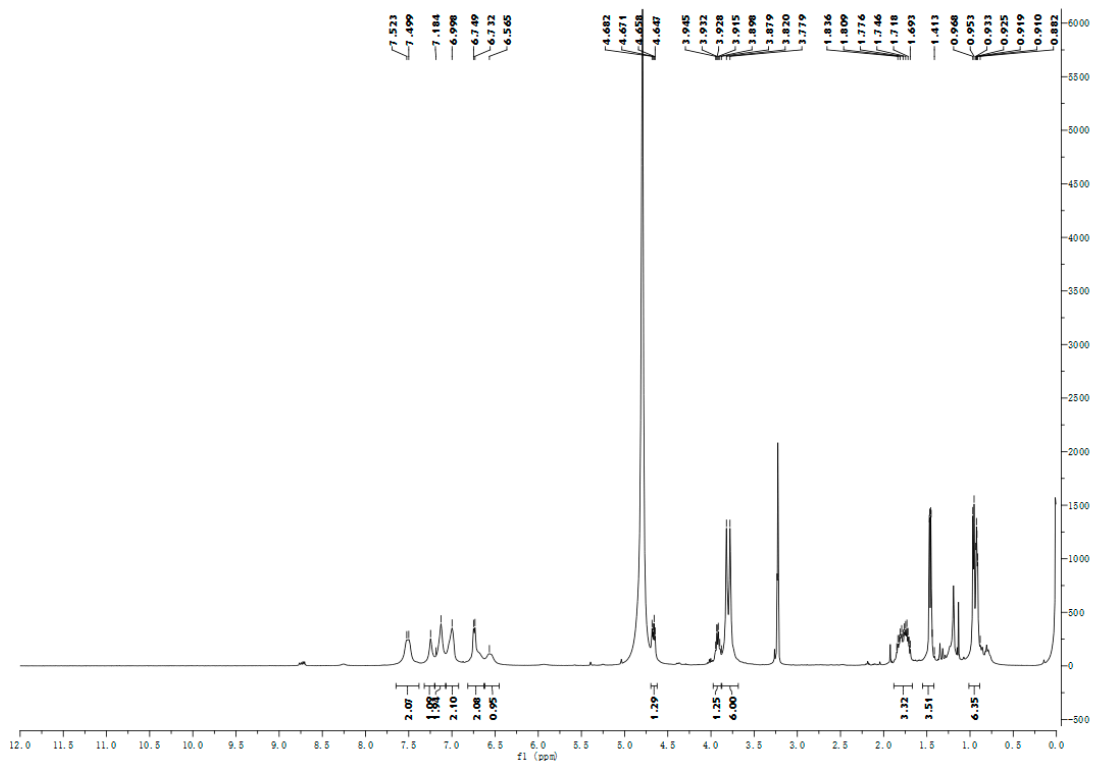

Figure S78.  $^1\text{H-NMR}$  for compound 14.

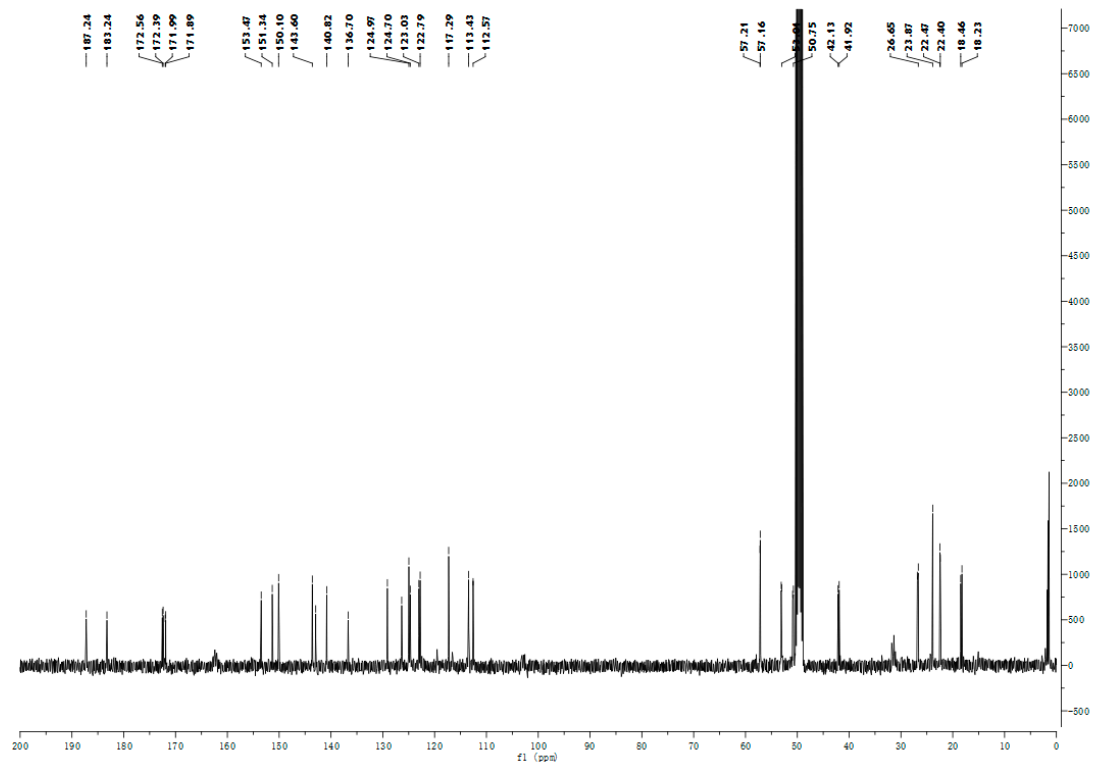

Figure S79.  $^{13}\text{C-NMR}$  for compound 14.

R.Time:0.250(Scan#:31)  
MassPeaks:360 BasePeak:553(342596)  
Spectrum Mode:Single 0.250(31)  
BG Mode:Averaged 0.008-0.183(2-23) Polarity:Positive Segment 1 - Event 1

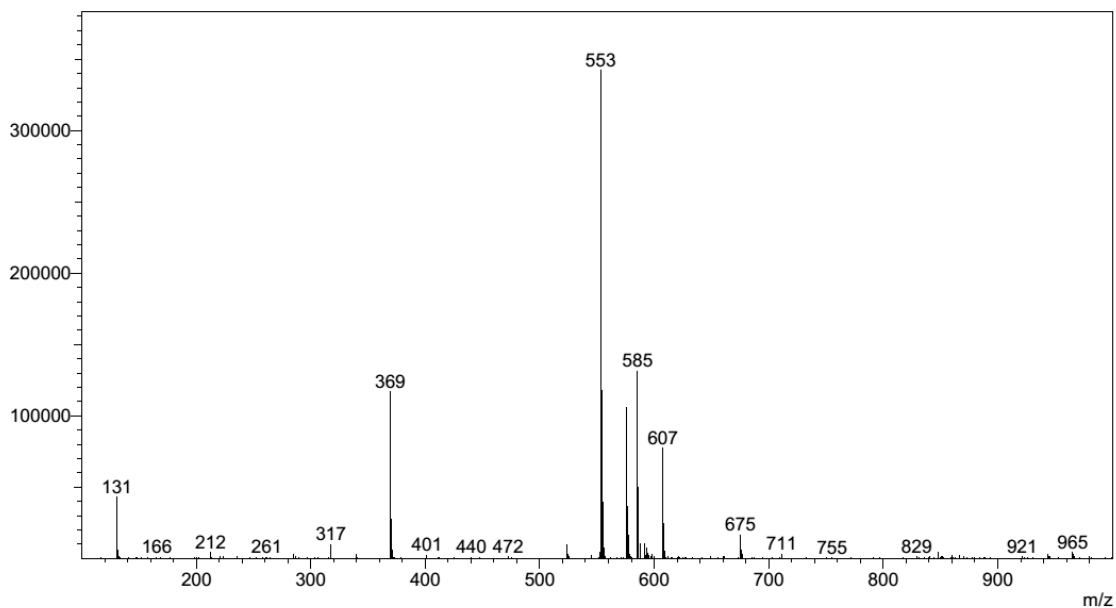

Figure S80. MS-ESI for compound 14.

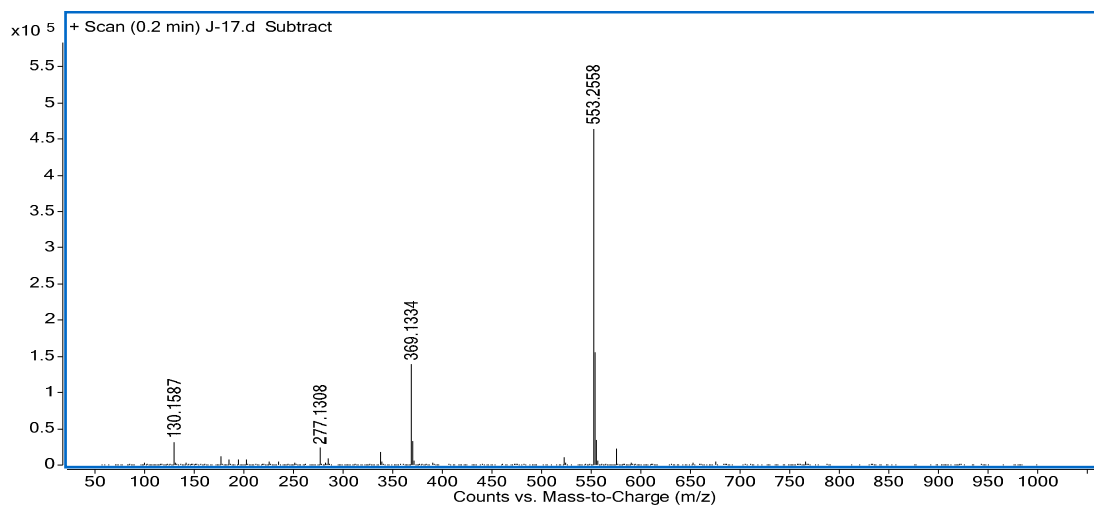

Figure S81. HRMS-ESI for compound 14.



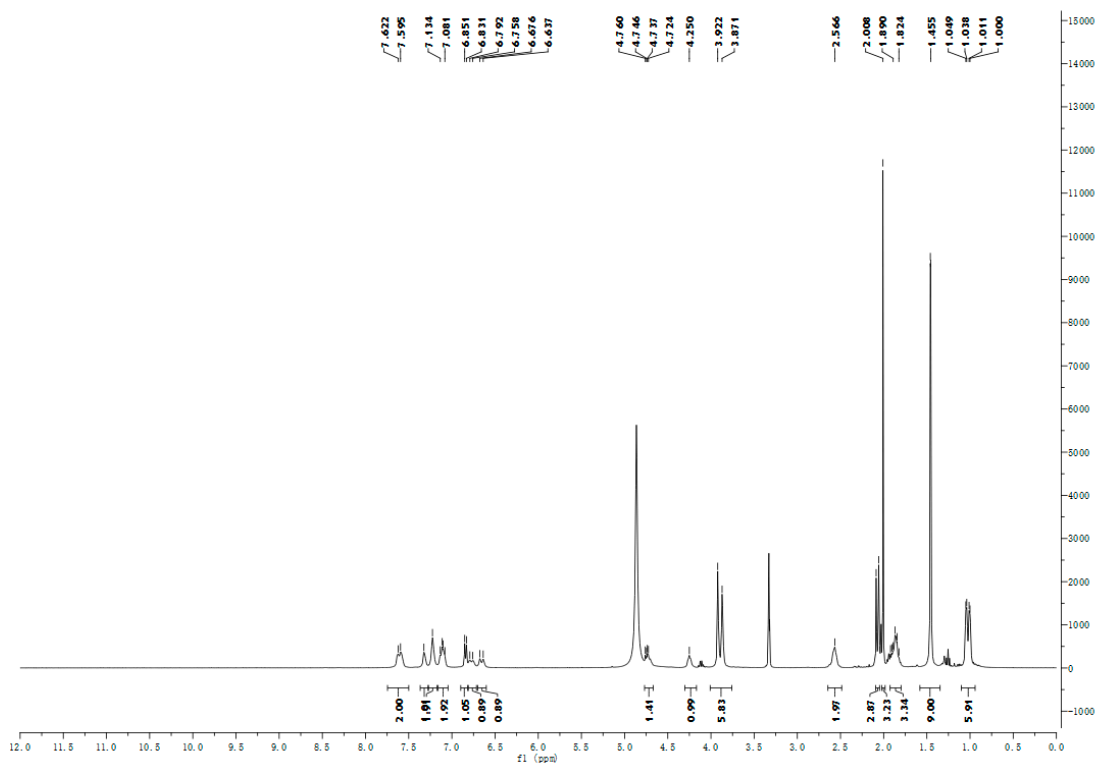

Figure S82.  $^1\text{H-NMR}$  for compound 15.

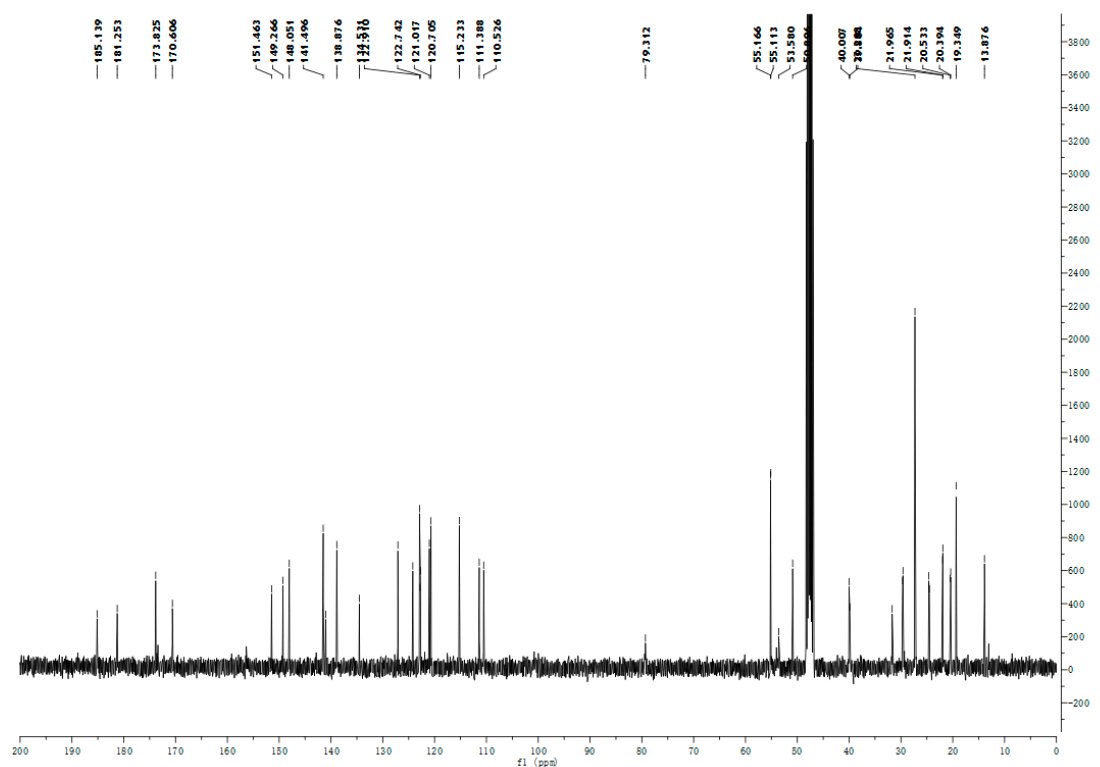

Figure S83.  $^{13}\text{C-NMR}$  for compound 15.

R.Time:0.250(Scan#:31)  
MassPeaks:435 BasePeak:774(154268)  
Spectrum Mode:Single 0.250(31)  
BG Mode:Averaged 0.008-0.158(2-20) Polarity:Negative Segment 1 - Event 1

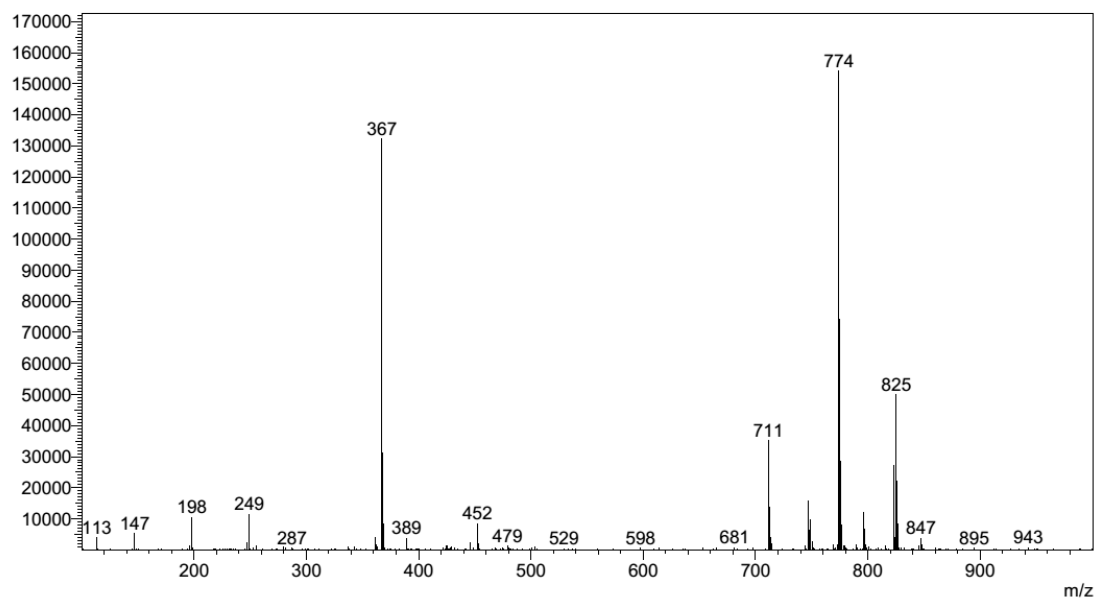

Figure S84. MS-ESI for compound 15.

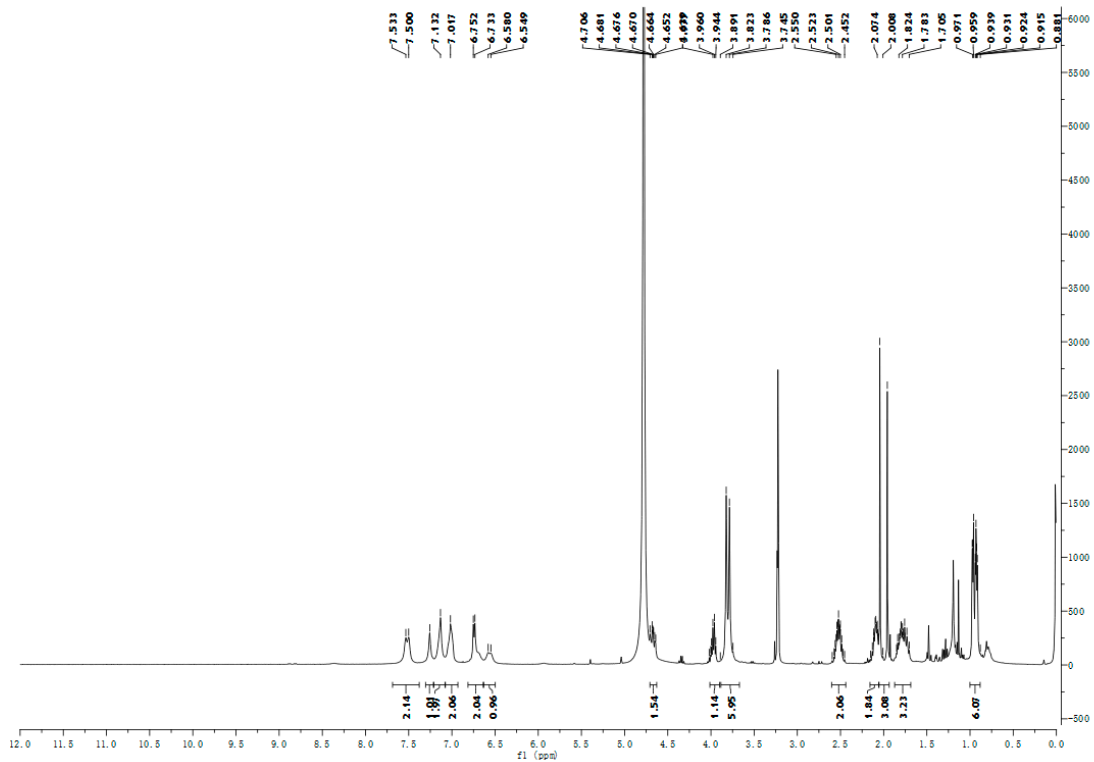

Figure S85. <sup>1</sup>H-NMR for compound 16.

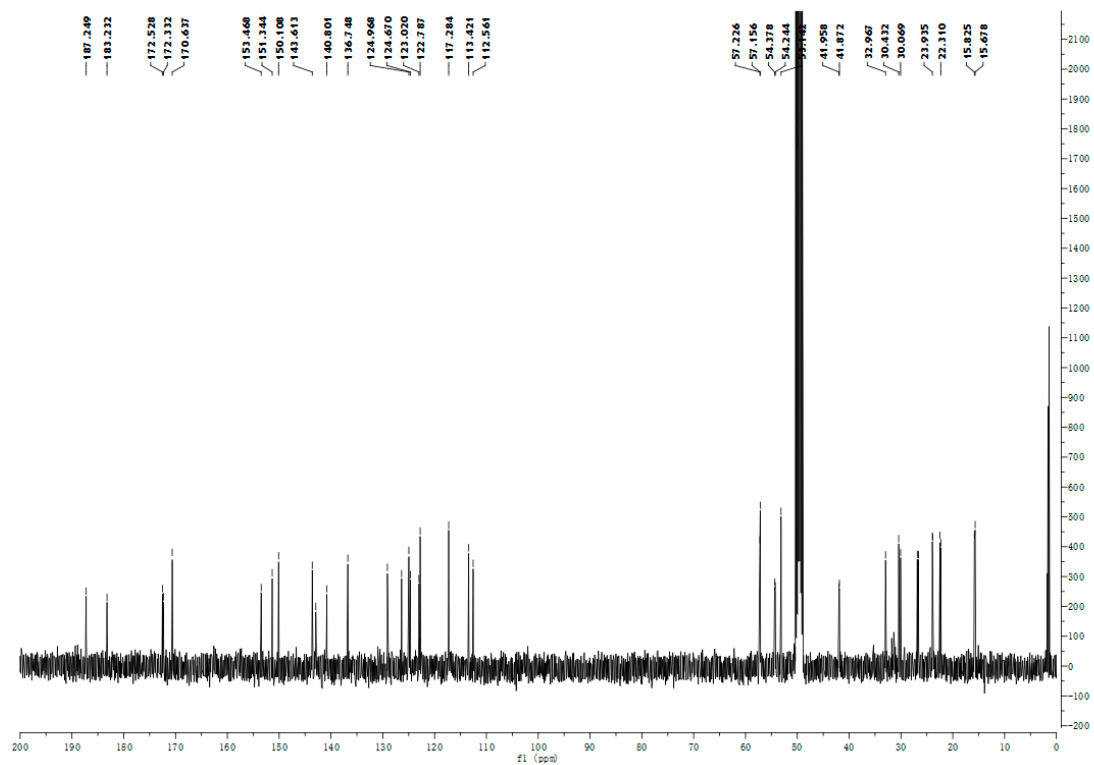

Figure S86.  $^{13}\text{C}$ -NMR for compound 16.

R.Time:0.292(Scan#:36)  
 MassPeaks:341 BasePeak:613(459275)  
 Spectrum Mode:Single 0.292(36)  
 BG Mode:Averaged 0.008-0.083(2-11) Polarity:Positive Segment 1 - Event 1

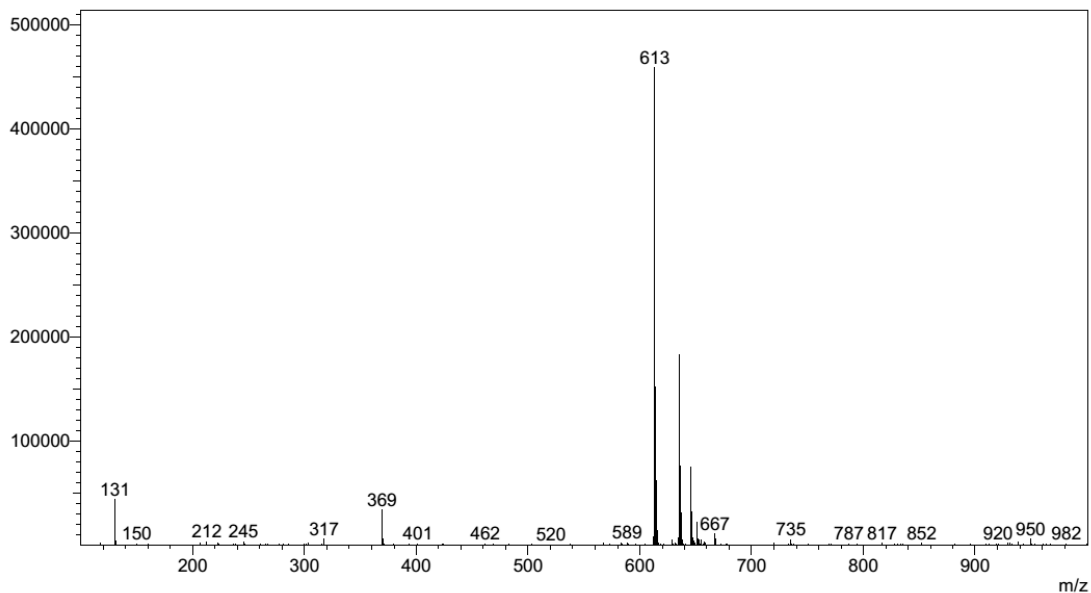

Figure S87. MS-ESI for compound 16.

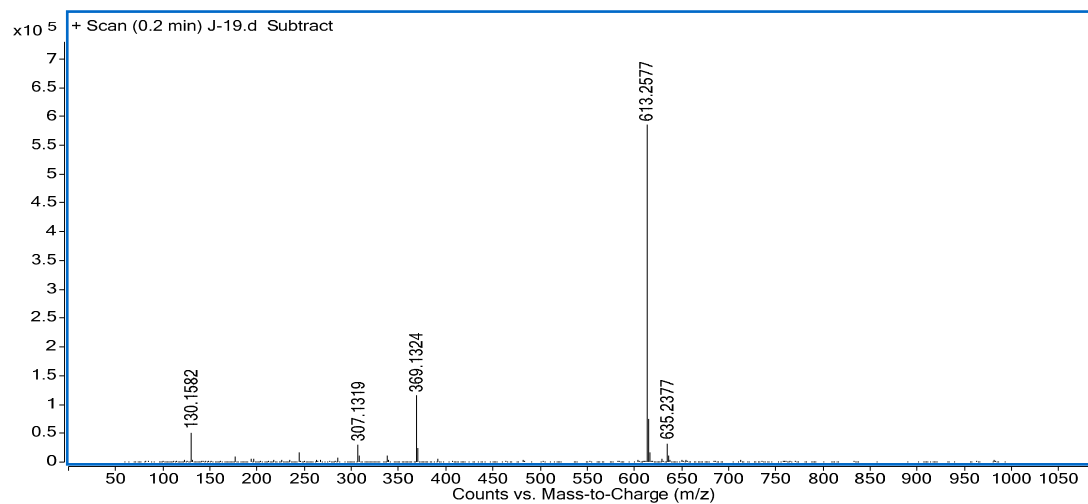

Figure S88. HRMS-ESI for compound 16.

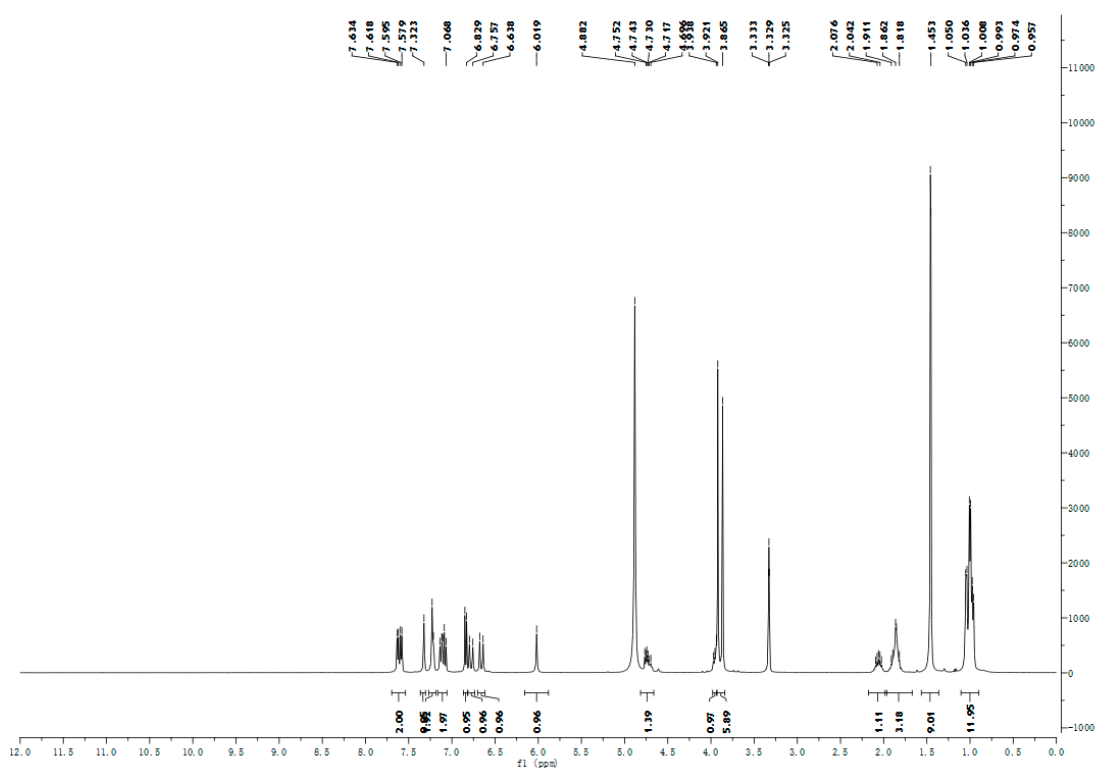

Figure S89. <sup>1</sup>H-NMR for compound 17.

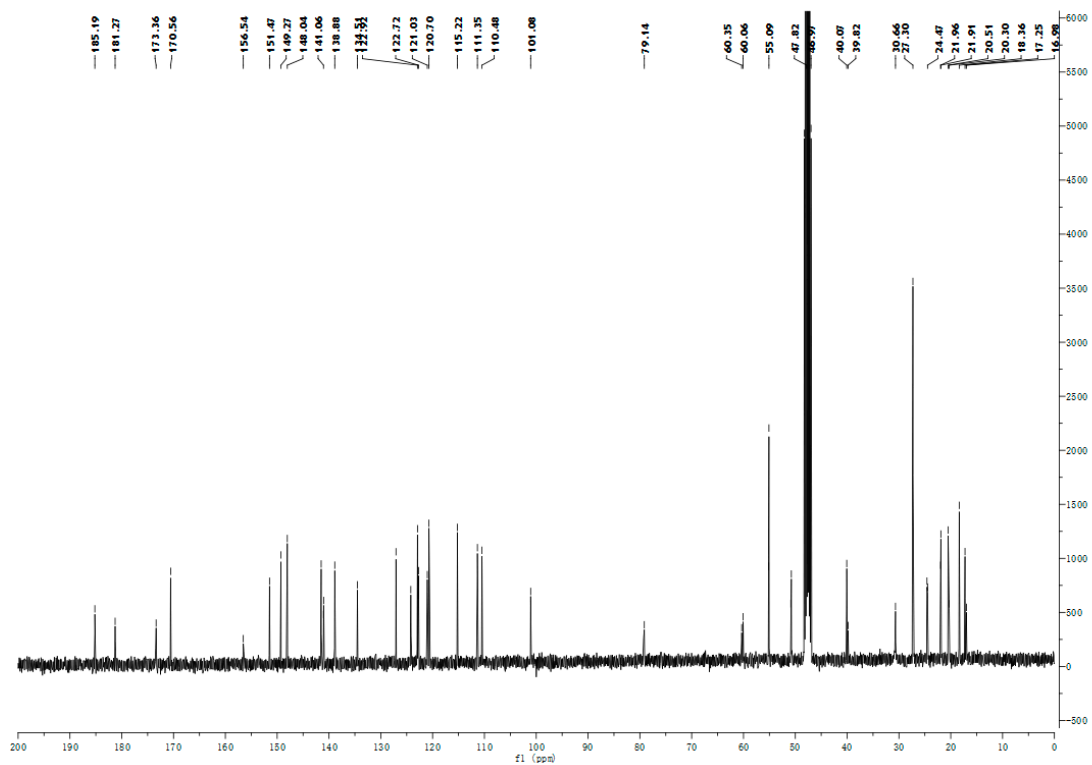

Figure S90.  $^{13}\text{C}$ -NMR for compound 17.

R. Time: 0.367 (Scan#: 45)  
 Mass Peaks: 435 Base Peak: 742 (41032)  
 Spectrum Mode: Single 0.367 (45)  
 BG Mode: Averaged 0.708-1.092 (86-132) Polarity: Negative Segment 1 - Event 1

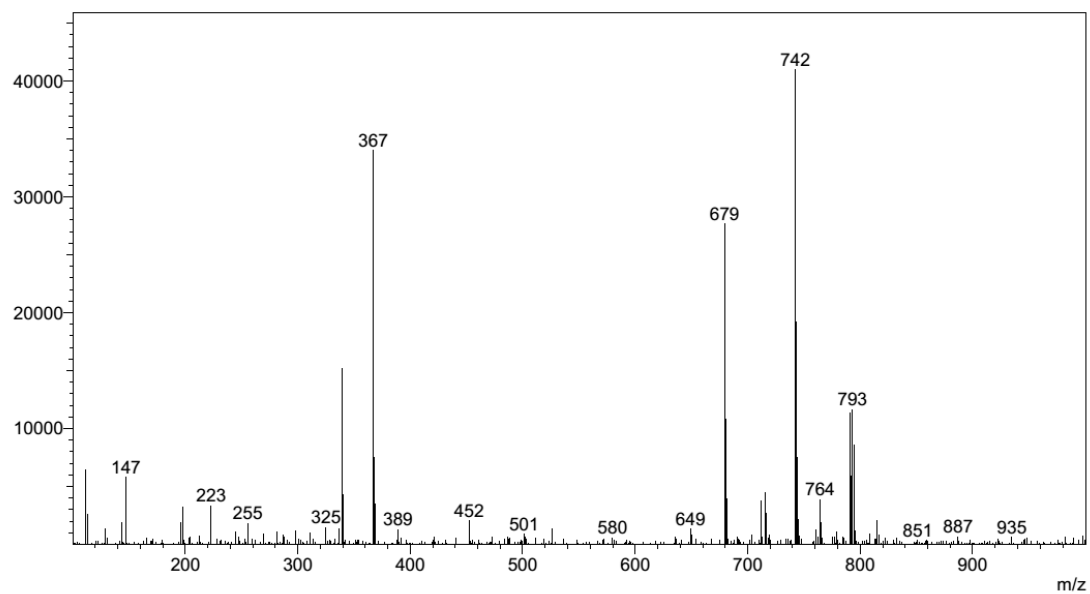

Figure S91. MS-ESI for compound 17.

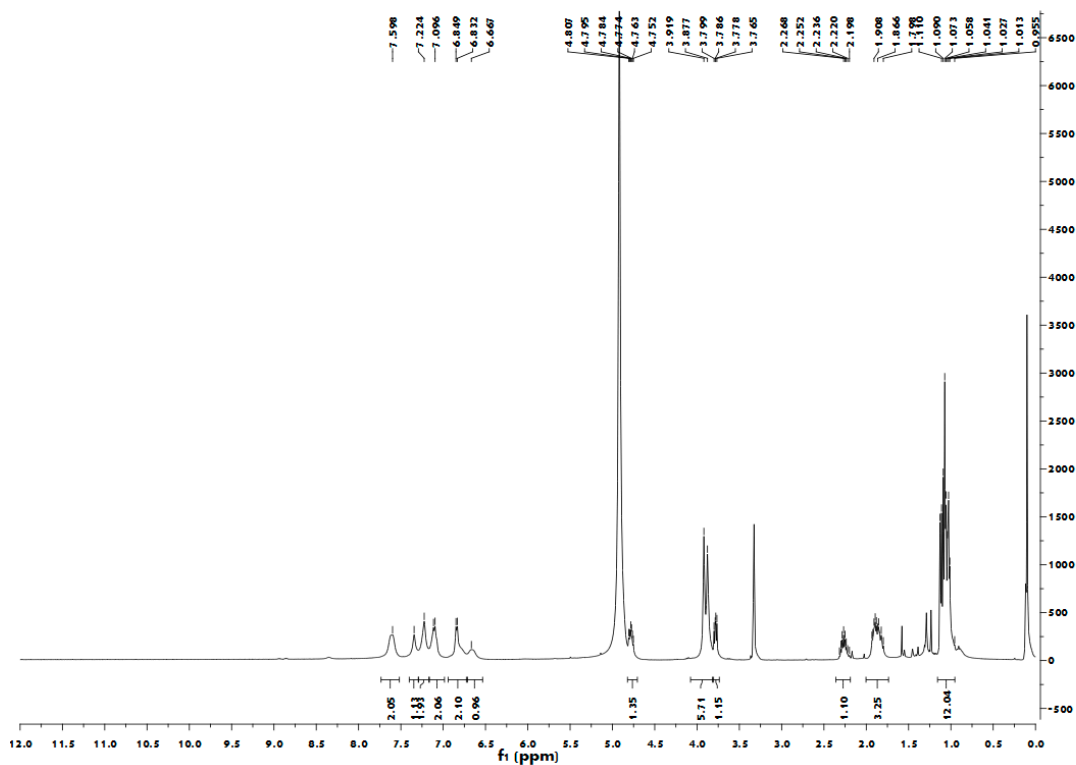

Figure S92.  $^1\text{H-NMR}$  for compound 18.

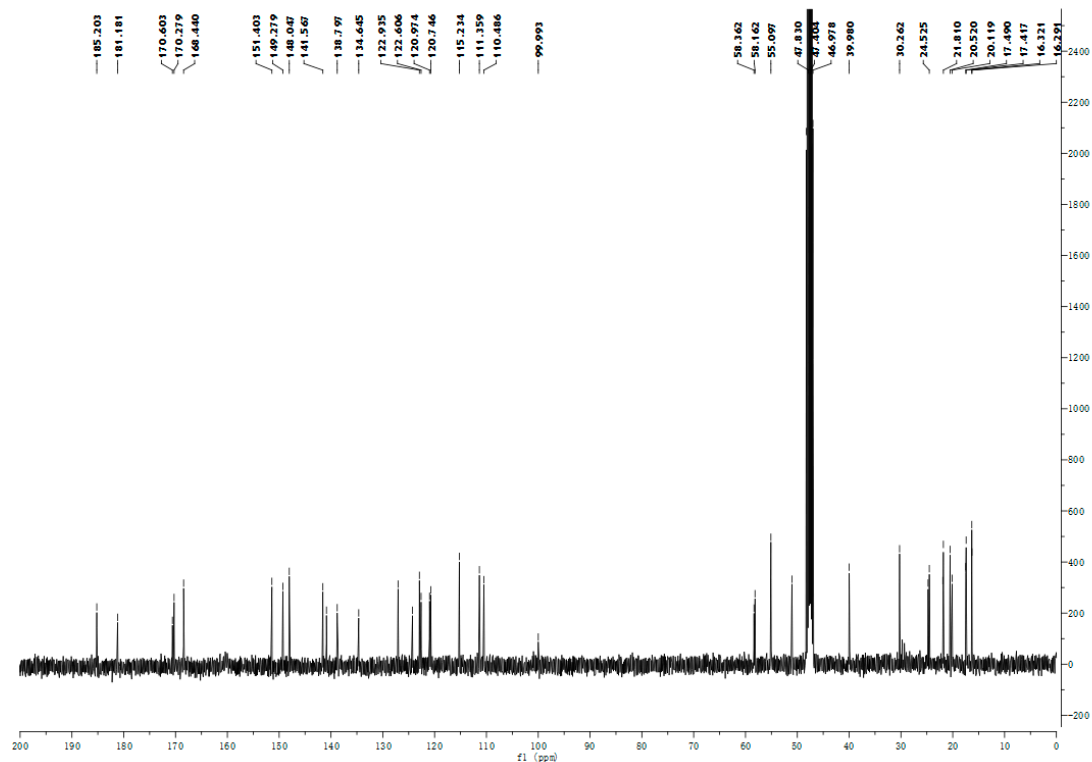

Figure S93.  $^{13}\text{C-NMR}$  for compound 18.

R.Time:0.267(Scan#:33)  
MassPeaks:337 BasePeak:581(578553)  
Spectrum Mode:Single 0.267(33)  
BG Mode:Averaged 0.008-0.142(2-18) Polarity:Positive Segment 1 - Event 1

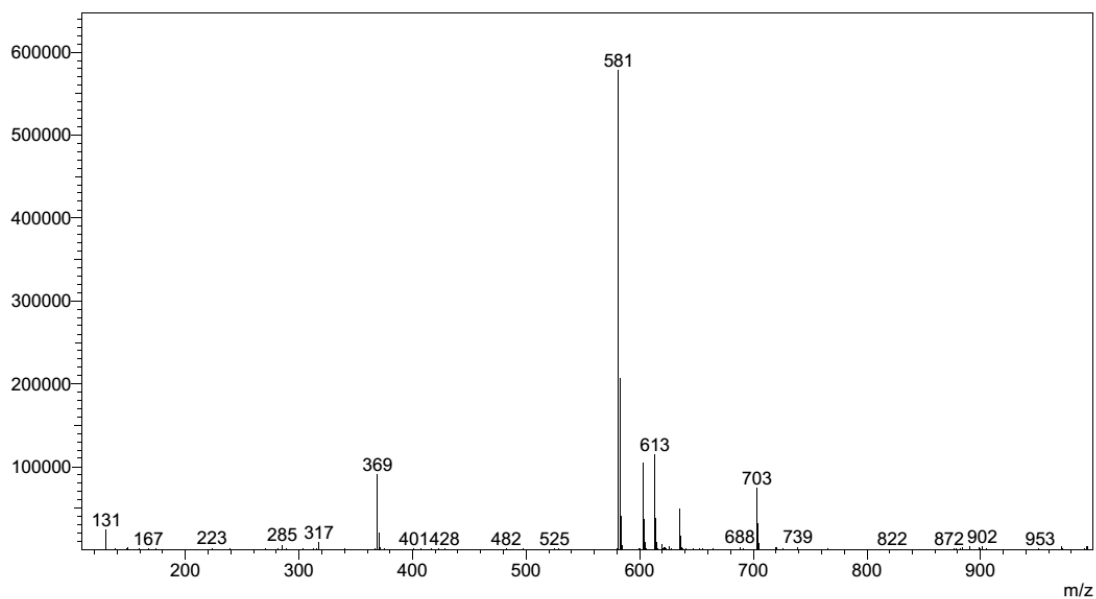

Figure S94. MS-ESI for compound 18.

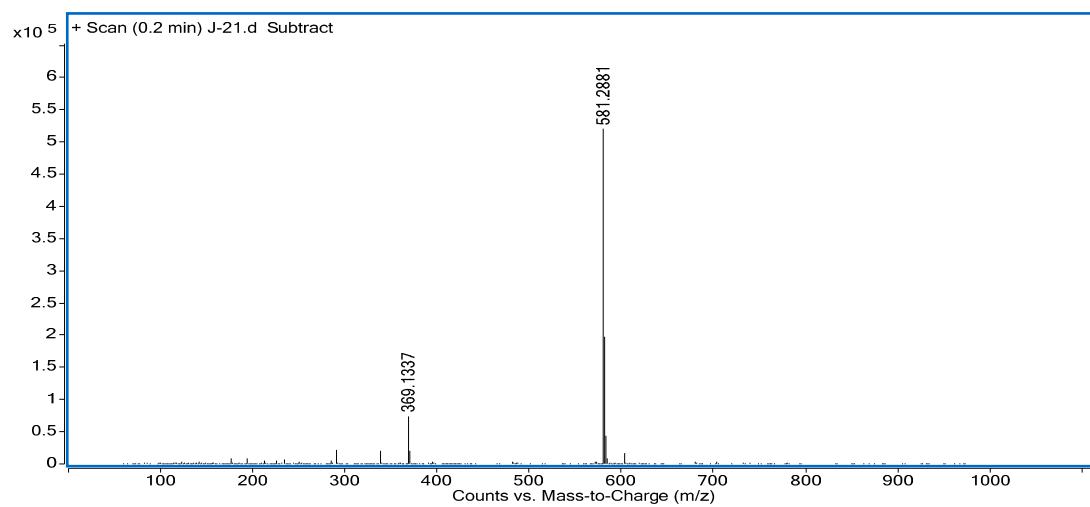

Figure S95. HRMS-ESI for compound 18.
